# Supplementary material for: Asymmetric synthesis of metallocenes with planar and central chirality by rhodium-catalyzed desymmetrization reactions
Source: Royal Society of Chemistry journal article supplement (doi:10.1039/d5sc00158g), 2025-01-01

## Supporting Information

### **Asymmetric synthesis of metallocenes with planar and central chirality by rhodium-catalyzed desymmetrization reactions**

Nan-Nan Hang,<sup>a,b</sup> En-Guang Tong,<sup>a,b</sup> Ting Qi,<sup>c</sup> Chao Sun,<sup>a</sup> and Jialin Ming<sup>\*a</sup>

<sup>a</sup>Natural Products Chem-Bio Innovation Center, College of Food and Biological Engineering,  
College of Chemistry and Chemical Engineering, Chengdu University, Chengdu 610016, China

<sup>b</sup>Inner Mongolia Key Laboratory of Fine Organic Synthesis, Inner Mongolia University, 235 West  
University Street, Hohhot 010021

<sup>c</sup>School of Pharmacy, Chengdu University, Chengdu 610106, China

\*Email: mingjialin@imu.edu.cn

## Contents

|     |                                                                                                                                      |    |
|-----|--------------------------------------------------------------------------------------------------------------------------------------|----|
| 1.  | General method.....                                                                                                                  | 3  |
| 2.  | Materials.....                                                                                                                       | 4  |
| 3.  | Preparation of 1,2-diformylmetallocenes .....                                                                                        | 5  |
| 4.  | A typical procedure for Rh-catalyzed desymmetric addition of organoboronic acids to 1,2-diformylmetallocenes (Table 1, entry 1)..... | 7  |
| 5.  | A typical procedure for kinetic resolution of 2-substituted 1-formylferrocenes (Scheme 4).....                                       | 8  |
| 6.  | Optimization of the reaction conditions .....                                                                                        | 9  |
| 7.  | Synthetic transformations.....                                                                                                       | 11 |
| 7.1 | Synthesis of Josiphos-type ligands.....                                                                                              | 11 |
| 7.2 | Synthesis of Josiphos without central chirality .....                                                                                | 12 |
| 7.3 | Synthesis of Josiphos, PPFA, and other phosphorous ligands.....                                                                      | 13 |
| 7.4 | Palladium-catalyzed asymmetric allylic alkylation.....                                                                               | 16 |
| 8.  | Characterization of the products.....                                                                                                | 18 |
| 9.  | Single crystal x-ray diffraction data for compound 3ah(CCDC 2403094) .....                                                           | 38 |
| 10. | References.....                                                                                                                      | 40 |
| 11. | Chiral HPLC charts and NMR spectra .....                                                                                             | 41 |

## 1. General method

All air-sensitive manipulations were carried out with standard Schlenk techniques under nitrogen or argon. NMR spectra were recorded on Bruker spectrometer AV 600MHz, QNP probe (600 MHz for  $^1\text{H}$ , 150 MHz for  $^{13}\text{C}$ , and 243 MHz for  $^{31}\text{P}$ ). Chemical shifts are reported in  $\delta$  (ppm) referenced to the residual solvent peak of  $\text{CHCl}_3$  ( $\delta$  7.26) for  $^1\text{H}$  NMR spectroscopy and  $\text{CDCl}_3$  ( $\delta$  77.0) for  $^{13}\text{C}$  NMR spectroscopy. The following abbreviations are used to describe the multiplicities; s: singlet, d: doublet, t: triplet, q: quartet, quint: quintet, m: multiplet, br: broad. Coupling constants are reported in Hertz (Hz). Optical rotations were measured on an Anton Paar MCP-4100. High resolution mass spectra (HRMS) (ESI) were obtained on a Bruker microTOF II spectrometer. Matrix-Assisted Laser Desorption/Ionization Time of Flight (MALDI-TOF) mass spectra were measured on an AXIMA Performance spectrometer. For thin layer chromatography (NUO TAI precoated TLC plates (SHF254) were used, and compounds were visualized with a UV light at 254 nm TLC). Further visualization was achieved by staining with  $\text{KMnO}_4$  followed by heating. Flash column chromatography was performed with Silica gel (SANPONT). Enantiomeric excesses (ee) were determined by HPLC analysis on Shimadzu (LC-40) HPLC and Shimadzu (LC-16) HPLC with Daicel chiral columns.

## 2. Materials

*N,N*-dimethylaminomethylferrocene, *N,N*-dimethylaminomethylruthenocene, 1-dimethylaminomethyl-1'-trimethylsilylferrocene, tetrabutylammonium fluoride, tricarbonyl[(1,2,3,4,5- $\eta$ )-1-[(dimethylamino)methyl]-2,4-cyclopentadien-1-yl]manganese, chlorotrimethylsilane, chlorodiphenylphosphine, hydrogen peroxide (30 wt.% in H<sub>2</sub>O), methylmagnesium bromide, phenylmagnesium bromide, sodium borohydride, diphenylphosphine, sodium iodide, triethoxysilane, titanium tetraisopropanolate, 4-dimethylaminopyridine, dicyclohexylphosphine, dimethylamine, tetrabutylammonium fluoride, organoboronic acids **2a–2t** were purchased and used as received. Tetrahydrofuran, ethyl ether, methylene chloride, isopropanol, *tert*-butanol and toluene were distilled over benzophenone ketyl under Ar.

[RhCl(coe)<sub>2</sub>]<sub>2</sub>,<sup>1</sup> [RhCl(*R,R*-Fc-tfb)]<sub>2</sub>,<sup>2</sup> **1e** (CAS No. 146291-53-4),<sup>3</sup> **1f** (CAS No. 854497-34-0),<sup>4</sup> **1g** (CAS No. 934276-76-3),<sup>5</sup> and **21**<sup>6</sup> were prepared according to the reported procedures.



### 3. Preparation of 1,2-diformylmetallocenes

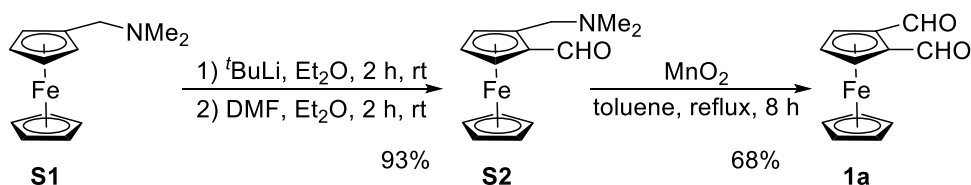

Under argon, to a solution of *N,N*-dimethylaminomethylferrocene (**S1**, 452.2 mg, 1.86 mmol, 1.0 equiv) in Et<sub>2</sub>O (25 mL), <sup>t</sup>BuLi (1.3 M in heptane, 2.2 mL, 2.79 mmol, 1.5 equiv) was added dropwise at 0 °C, and the mixture was stirred at room temperature for 2 h. DMF (271.9 mg, 3.72 mmol, 2.0 equiv) was added to the mixture. The mixture was stirred at room temperature for 2 h, quenched with H<sub>2</sub>O (5.0 mL), and extracted with ethyl acetate. The combined organic layers were dried over MgSO<sub>4</sub>, filtered, and concentrated under vacuum. The residue was purified by flash column chromatography on silica gel (hexane/ethyl ether/triethylamine = 10:1:1) to give compound **S2** (93% yield, 469.1 mg, 1.73 mmol) as a red oil. <sup>1</sup>H NMR (600 MHz, CDCl<sub>3</sub>): δ 10.10 (s, 1H), 4.78 (s, 1H), 4.61 (s, 1H), 4.55 (s, 1H), 4.22 (s, 5H), 3.83 (d, *J* = 13.0 Hz, 1H), 3.34 (d, *J* = 13.0 Hz, 1H), 2.21 (s, 6H). The experimental data are in agreement with the literature report.<sup>7</sup>

Under argon, a solution of compound **S2** (317.2 mg, 1.17 mmol, 1.0 equiv) in toluene (30 mL) was added to activated MnO<sub>2</sub> (2.101 g, 23.4 mmol, 20.0 equiv). The mixture was stirred at reflux for 8 h and then filtered over Celite 545. The organic layers were concentrated under vacuum. The residue was purified by flash column chromatography on silica gel (hexane/ethyl ether = 5:1) to give compound **1a** (68% yield, 193.6 mg, 0.80 mmol) as a red solid. <sup>1</sup>H NMR (600 MHz, CDCl<sub>3</sub>): δ 10.4 (s, 2H), 5.21 (s, 2H), 4.94 (s, 1H), 4.40 (s, 5H). The experimental data are in agreement with the literature report.<sup>7</sup>

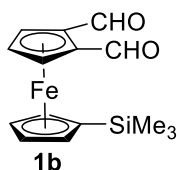

**Compound 1b:** (66% yield, 103.7 mg, 0.33 mmol, a red solid, *R<sub>f</sub>* = 0.3. (eluent: hexane/ethyl acetate = 5:1)). It was synthesized from compound 1-dimethylaminomethyl-1'-trimethylsilylferrocene according to the procedure for compound **1a** in 0.50 mmol scale. <sup>1</sup>H NMR (600 MHz, CDCl<sub>3</sub>): δ 10.4 (s, 2H), 5.16 (d, *J* = 2.8 Hz, 2H), 4.88 (s, 1H), 4.60

(s, 2H), 4.29 (s, 2H), 0.22 (s, 9H). The experimental data are in agreement with the literature report.<sup>7</sup>

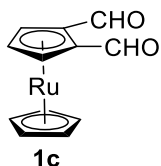

**Compound 1c:** (58% yield, 83.3 mg, 0.29 mmol, a yellow solid,  $R_f = 0.3$ . (eluent: hexane/ethyl acetate = 5:1)). It was synthesized from compound *N,N*-dimethylaminomethylruthenocene according to the procedure for compound **1a** in 0.50 mmol scale.  $^1\text{H NMR}$  (600 MHz,  $\text{CDCl}_3$ ):  $\delta$  10.1 (s, 2H), 5.39 (d,  $J = 2.7$  Hz, 2H), 5.10 (t,  $J = 2.7$  Hz, 1H), 4.77 (s, 5H). The experimental data are in agreement with the literature report.<sup>7</sup>

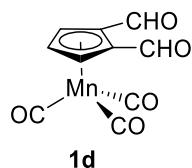

**Compound 1d:** (48% yield, 62.4 mg, 0.24 mmol, a dark green solid,  $R_f = 0.4$ . (eluent: hexane/ethyl acetate = 5:1)). It was synthesized from compound tricarbonyl[(1,2,3,4,5- $\eta$ )-1-[(dimethylamino)methyl]-2,4-cyclopentadien-1-yl]-manganese according to the procedure for compound **1a** in 0.50 mmol scale.  $^1\text{H NMR}$  (600 MHz,  $\text{CDCl}_3$ ):  $\delta$  10.0 (s, 2H), 5.66 (s, 2H), 4.95 (s, 1H). The experimental data are in agreement with the literature report.<sup>7</sup>

4. A typical procedure for Rh-catalyzed desymmetric addition of organoboronic acids to 1,2-diformylmetallocenes (Table 1, entry 1)

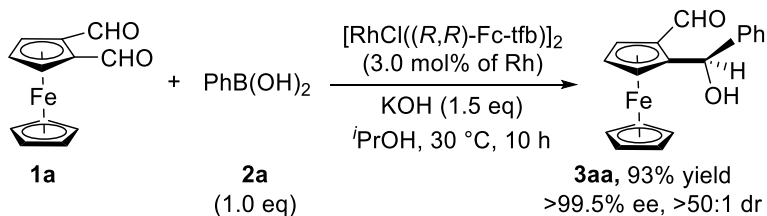

An oven-dried Schlenk tube was charged with **1a** (24.2 mg, 0.10 mmol, 1.0 equiv), [RhCl((*R,R*)-Fc-tfb)<sub>2</sub>] (2.19 mg, 1.5 μmol, 3.0 mol% of Rh), PhB(OH)<sub>2</sub> (12.2 mg, 0.10 mmol, 1.0 equiv), KOH (8.40 mg, 0.15 mmol, 1.5 equiv), and isopropanol (1.0 mL) under argon. The tube was placed in a preheated oil bath at 30 °C. The mixture was stirred at 30 °C for 10 h before extracted with ethyl acetate. The organic layers were concentrated under vacuum. The residue was subjected to column chromatography on silica gel to give compound (*R,Rp*)-**3aa** (93% yield, 29.8 mg, 0.093 mmol) as a red solid, *R<sub>f</sub>* = 0.4 (hexane/ethyl acetate (5/1)).

## 5. A typical procedure for kinetic resolution of 2-substituted 1-formylferrocenes

### (Scheme 4)

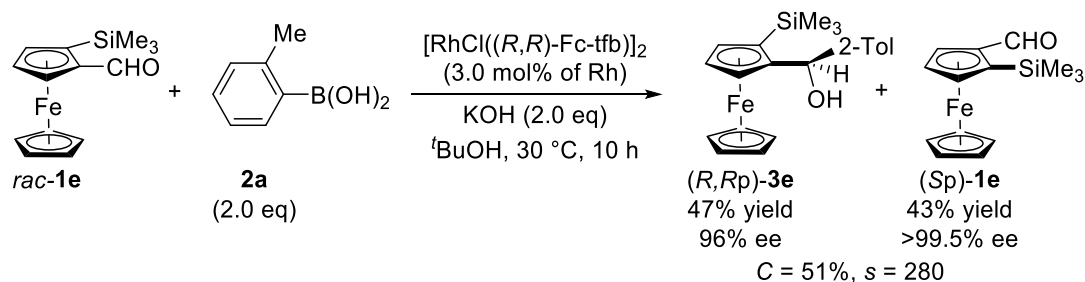

An oven-dried Schlenk tube was charged with compound *rac-1e* (28.6 mg, 0.10 mmol, 1.0 equiv),  $[\text{RhCl}((R,R)\text{-Fc-tfb})_2]$  (2.19 mg, 1.5  $\mu\text{mol}$ , 3.0 mol% Rh), 2-methylphenylboronic acid (27.2 mg, 0.20 mmol, 2.0 equiv), KOH (11.2 mg, 0.20 mmol, 2.0 equiv), and *tert*-butanol (1.0 mL) under argon. The tube was placed in a preheated oil bath at 30 °C. The mixture was stirred at 30 °C for 10 h before extracted with ethyl acetate. The organic layers were concentrated under vacuum. The residue was subjected to column chromatography on silica gel to give compound  $(R,R_p)\text{-3e}$  (47% yield, 17.8 mg, 0.047 mmol) as a yellow solid,  $R_f = 0.60$  (hexane/ethyl acetate (20/1)), and the recovered compound  $(S_p)\text{-1e}$  (43% yield, 12.3 mg, 0.043 mmol) as a red solid,  $R_f = 0.40$  (hexane/ethyl acetate (20/1)). (Calculated conversion,  $C$ , =  $ee_1/(ee_1+ee_3)$ , selectivity factor,  $s = \ln[(1-C)(1-ee_1)]/\ln[(1-C)(1+ee_1)]$ ).

## 6. Optimization of the reaction conditions

**Table S1** Rh-catalyzed addition to metallocene dicarbaldehydes **1a**: evaluation of ligands<sup>a</sup>.

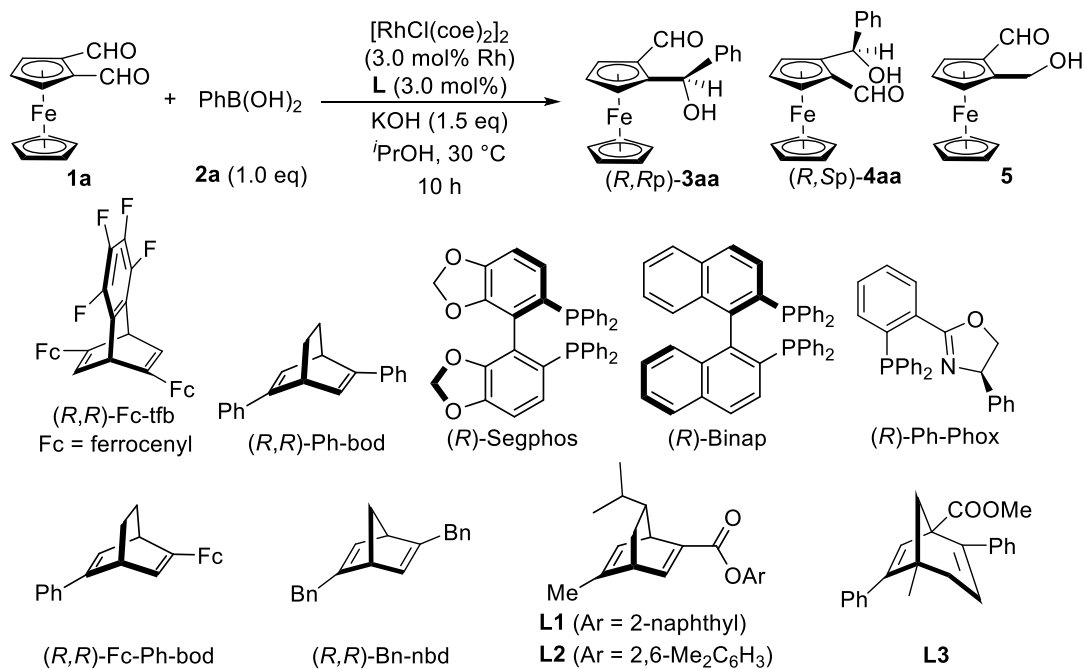

| entry | Rh catalyst                                              | yield (%) <sup>b</sup> <b>3aa</b> + <b>4aa</b> | ratio <sup>c</sup> of <b>3aa/4aa</b> | ee <sup>d</sup> of <b>3aa</b> |
|-------|----------------------------------------------------------|------------------------------------------------|--------------------------------------|-------------------------------|
| 1     | [RhCl(coe) <sub>2</sub> ] <sub>2</sub> + (R,R)-Fc-tfb    | 93                                             | >50:1                                | >99.5                         |
| 2     | [RhCl(coe) <sub>2</sub> ] <sub>2</sub> + (R,R)-Ph-bod    | 44                                             | 67:33                                | 51                            |
| 3     | [RhCl(coe) <sub>2</sub> ] <sub>2</sub> + (R)-Segphos     | <5                                             | --                                   | --                            |
| 4     | [RhCl(coe) <sub>2</sub> ] <sub>2</sub> + (R)-Binap       | 11                                             | 63:37                                | 24                            |
| 5     | [RhCl(coe) <sub>2</sub> ] <sub>2</sub> + (R)-Ph-Phox     | 10                                             | 80:20                                | 0                             |
| 6     | [RhCl(coe) <sub>2</sub> ] <sub>2</sub> + (R,R)-Fc-Ph-bod | <5                                             | --                                   | --                            |
| 7     | [RhCl(coe) <sub>2</sub> ] <sub>2</sub> + Bn-nbd          | 19                                             | 79:21                                | 21                            |
| 8     | [RhCl(coe) <sub>2</sub> ] <sub>2</sub> + <b>L1</b>       | 6                                              | 85:15                                | 40                            |
| 9     | [RhCl(coe) <sub>2</sub> ] <sub>2</sub> + <b>L2</b>       | 6                                              | 88:12                                | 9                             |
| 10    | [RhCl(coe) <sub>2</sub> ] <sub>2</sub> + <b>L3</b>       | <5                                             | --                                   | --                            |
| 11    | PhZnCl                                                   | <5                                             | --                                   | --                            |

<sup>a</sup>Reaction conditions: **1a** (0.10 mmol), **2a** (0.10 mmol), [RhCl(coe)<sub>2</sub>]<sub>2</sub> (1.5 mol% dimer, 3 mol% Rh), ligand (3.0 mol%), KOH (0.15 mmol), and 2-Propanol (1.0 mL) at 30 °C (oil bath) for 10 h. <sup>b</sup>Isolated yield. <sup>c</sup>Determined by <sup>1</sup>H NMR spectroscopy. <sup>d</sup>% ee was determined by HPLC on a chiral stationary phase column.

**Table S2** Rh-catalyzed addition to metallocene dicarbaldehydes **1a**: screening of temperatures<sup>a</sup>.

| entry | T (°C) | conv <sup>b</sup> of <b>1a</b> (%) | yield (%) <sup>c</sup> <b>3aa</b> + <b>4aa</b> | ratio <sup>b</sup> of <b>3aa/4aa</b> |
|-------|--------|------------------------------------|------------------------------------------------|--------------------------------------|
| 1     | 0      | 85                                 | 80                                             | >50:1                                |
| 2     | 30     | 100                                | 93                                             | >50:1                                |
| 3     | 60     | 100                                | <5                                             | --                                   |

<sup>a</sup>Reaction conditions: **1a** (0.10 mmol), **2a** (0.10 mmol), [RhCl((*R,R*)-Fc-tfb)<sub>2</sub>] (3.0 mol% Rh), KOH (0.15 mmol), and 2-propanol (1.0 mL) at T (°C) (oil bath) for 10 h. <sup>b</sup>Determined by <sup>1</sup>H NMR spectroscopy. <sup>c</sup>Isolated yield.

**Table S3** Rh-catalyzed addition to metallocene dicarbaldehydes **1a**: screening of bases<sup>a</sup>.

| entry | base                           | conv <sup>b</sup> of <b>1a</b> (%) | yield (%) <sup>c</sup> <b>3aa</b> + <b>4aa</b> | ratio <sup>b</sup> of <b>3aa/4aa</b> |
|-------|--------------------------------|------------------------------------|------------------------------------------------|--------------------------------------|
| 1     | KOH                            | 100                                | 93                                             | >50:1                                |
| 2     | K <sub>2</sub> CO <sub>3</sub> | 37                                 | 33                                             | >50:1                                |
| 3     | Et <sub>3</sub> N              | <5                                 | --                                             | --                                   |

<sup>a</sup>Reaction conditions: **1a** (0.10 mmol), **2a** (0.10 mmol), [RhCl((*R,R*)-Fc-tfb)<sub>2</sub>] (3.0 mol% Rh), base (0.15 mmol), and 2-Propanol (1.0 mL) at 30 °C (oil bath) for 10 h. <sup>b</sup>Determined by <sup>1</sup>H NMR spectroscopy. <sup>c</sup>Isolated yield.

**Table S4** Rh-catalyzed addition to metallocene dicarbaldehydes **1a**: screening of solvents<sup>a</sup>.

| entry | solvent                         | conv <sup>b</sup> of <b>1a</b> (%) | yield (%) <sup>c</sup> <b>3aa</b> + | ratio <sup>b</sup> of <b>3aa/4aa</b> | ee <sup>d</sup> of <b>3aa</b> |
|-------|---------------------------------|------------------------------------|-------------------------------------|--------------------------------------|-------------------------------|
| 1     | <sup>i</sup> PrOH               | 100                                | 93                                  | >50:1                                | >99.5                         |
| 2     | <sup>t</sup> BuOH               | 100                                | 94                                  | >50:1                                | 96                            |
| 3     | MeOH                            | 22                                 | 20                                  | >50:1                                | 79                            |
| 4     | dioxane/H <sub>2</sub> O (10/1) | 92                                 | 90                                  | >50:1                                | 79                            |

<sup>a</sup>Reaction conditions: **1a** (0.10 mmol), **2a** (0.10 mmol), [RhCl((*R,R*)-Fc-tfb)<sub>2</sub>] (3.0 mol% Rh), KOH (0.15 mmol), and solvent (1.0 mL) at 30 °C (oil bath) for 10 h. <sup>b</sup>Determined by <sup>1</sup>H NMR spectroscopy. <sup>c</sup>Isolated yield. <sup>d</sup>% ee was determined by HPLC on a chiral stationary phase column.

## 7. Synthetic transformations

### 7.1 Synthesis of Josiphos-type ligands

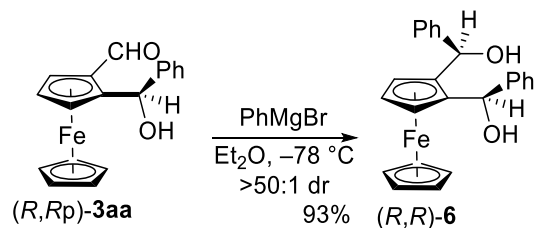

Under argon, to a solution of compound  $(R,Rp)$ -**3aa** (160.1 mg, 0.50 mmol, 1.0 equiv,  $>99.5\%$  ee) in  $\text{Et}_2\text{O}$  (5.0 mL), phenylmagnesium bromide (0.77 M in THF, 1.3 mL, 2.0 equiv) was added dropwise at  $-78\text{ }^\circ\text{C}$ , and the mixture was stirred at  $-78\text{ }^\circ\text{C}$  for 2 h. The mixture was allowed to warm to room temperature slowly and stirred at room temperature for 8 h, quenched with  $\text{H}_2\text{O}$  (5.0 mL), and extracted with dichloromethane. The combined organic layers were dried over  $\text{MgSO}_4$ , filtered, and concentrated under vacuum. The residue was purified by flash column chromatography on silica gel (hexane/dichloromethane = 20:1) to give compound  $(R,R)$ -**6** (93% yield, 185.2 mg, 0.46 mmol) as a brown solid.

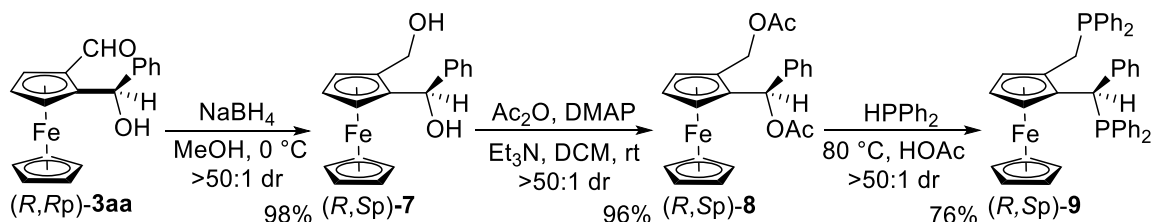

Under argon, to a solution of compound  $(R,Rp)$ -**3aa** (121.7 mg, 0.38 mmol, 1.0 equiv) in  $\text{MeOH}$  (10 mL),  $\text{NaBH}_4$  (21.6 mg, 0.57 mmol, 1.5 equiv) was added in several portions. The mixture was stirred at  $0\text{ }^\circ\text{C}$  for 1 h, quenched with  $\text{H}_2\text{O}$  (2.0 mL), and extracted with dichloromethane. The combined organic layers were dried over  $\text{MgSO}_4$ , filtered, and concentrated under vacuum. The residue was purified by flash column chromatography on silica gel (hexane/dichloromethane = 5:1) to give compound  $(R,Sp)$ -**7** (98% yield, 120.1 mg, 0.37 mmol) as an orange solid.

An oven-dried Schlenk tube was charged with compound  $(R,Sp)$ -**7** (96.6 mg, 0.30 mmol, 1.0 equiv),  $\text{DMAP}$  (29.8 mg, 0.24 mmol, 0.8 equiv),  $\text{Et}_3\text{N}$  (242.9 mg, 2.4 mmol, 8.0 equiv), and  $\text{DCM}$  (5.0 mL) under argon.  $\text{Ac}_2\text{O}$  (245.2 mg, 2.4 mmol, 8.0 equiv) was slowly

added to the Schlenk tube at room temperature. The mixture was stirred for 8 h, quenched with H<sub>2</sub>O (3.0 mL), and extracted with ethyl acetate. The combined organic layers were dried over MgSO<sub>4</sub>, filtered, and concentrated under vacuum. The residue was purified by flash column chromatography on silica gel (hexane/ethyl acetate = 5:1) to give compound (*R,S*)-**8** (96% yield, 117.2 mg, 0.29 mmol) as a yellow oil.

Under argon, to a solution of compound (*R,S*)-**8** (101.6 mg, 0.25 mmol, 1.0 equiv) in HOAc (2.0 mL), HPPPh<sub>2</sub> (465.5 mg, 2.5 mmol, 10 equiv) was added dropwise. The mixture was stirred at 80 °C for 12 h, quenched with saturated NaHCO<sub>3</sub> solution (3.0 mL), and extracted with ethyl acetate. The combined organic layers were dried over MgSO<sub>4</sub>, filtered, and concentrated under vacuum. The residue was purified by flash column chromatography on silica gel (hexane/ethyl acetate = 5:1) to give compound (*R,S*)-**9** (76% yield, 125.1 mg, 0.19 mmol) as a yellow solid.

## 7.2 Synthesis of Josiphos without central chirality

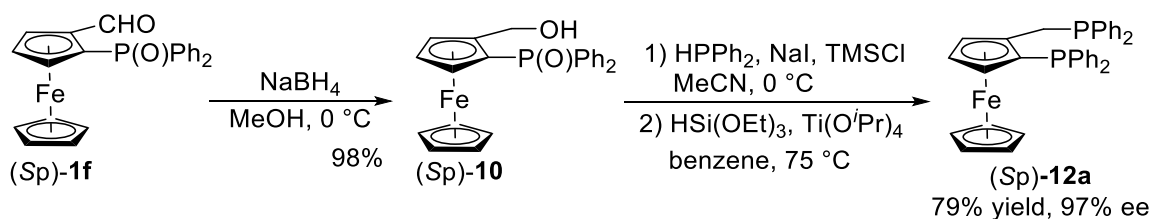

Under argon, to a solution of compound (*Sp*)-**1f** (83.0 mg, 0.20 mmol, 1.0 equiv) in MeOH (5.0 mL), NaBH<sub>4</sub> (15.2 mg, 0.40 mmol, 2.0 equiv) was added in several portions. The mixture was stirred at 0 °C for 2 h, quenched with H<sub>2</sub>O (1.0 mL), and extracted with dichloromethane. The combined organic layers were dried over MgSO<sub>4</sub>, filtered, and concentrated under vacuum. The residue was purified by flash column chromatography on silica gel (hexane/dichloromethane = 2:1) to give compound (*Sp*)-**10** (98% yield, 79.1 mg, 0.19 mmol) as a yellow solid.

An oven-dried Schlenk tube was charged with compound (*Sp*)-**10** (62.4 mg, 0.15 mmol, 1.0 equiv), NaI (45.0 mg, 0.30 mmol, 2.0 equiv), and MeCN (5.0 mL) under argon. Chlorotrimethylsilane (40.8 mg, 0.38 mmol, 2.5 equiv) was added. After stirring for 10 min, HPPPh<sub>2</sub> (56.0 mg, 0.30 mmol, 2.0 equiv) was added dropwise at 0 °C. The mixture was stirred at room temperature for 8 h, quenched with saturated NaHCO<sub>3</sub> solution (2.0 mL), and extracted with ethyl acetate. The combined organic layers were dried over MgSO<sub>4</sub>,



filtered, and concentrated under vacuum without further purification. Under argon, to a solution of the residue in benzene (5.0 mL), titanium tetrakisopropanolate (42.6 mg, 0.15 mmol 1.0 equiv) and triethoxysilane (266.1 mg, 1.62 mmol, 10.8 equiv) was added dropwise. The mixture was stirred at 75 °C for 12 h, filtered, and concentrated under vacuum. The residue was purified by flash column chromatography on silica gel (hexane/ethyl acetate = 20:1) to give compound (Sp)-12a (79% yield, 67.4 mg, 0.12 mmol) as a red solid. The compounds (Sp)-12b and compound (Sp)-12c were synthesized using the same procedure.

### 7.3 Synthesis of Josiphos, PPFA, and other phosphorous ligands

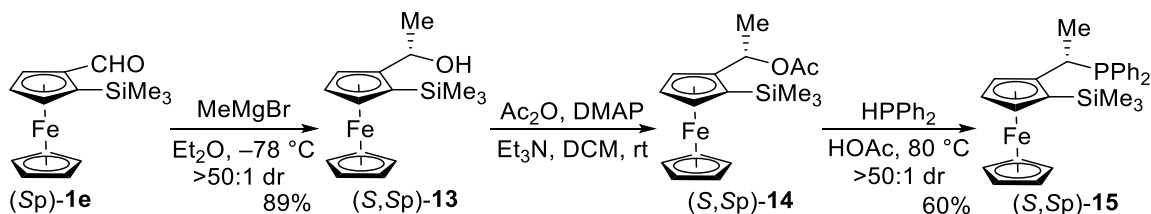

Under argon, to a solution of compound (Sp)-1e (57.2 mg, 0.20 mmol, 1.0 equiv, >99.5% ee) in Et<sub>2</sub>O (5.0 mL), MeMgBr (3.0 M in THF, 0.20 mL, 3.0 equiv) was added dropwise at -78 °C. The mixture was slowly warmed to room temperature and stirred at room temperature for 8 h. The mixture was quenched with H<sub>2</sub>O (5.0 mL) and extracted with ethyl acetate. The combined organic layers were dried over MgSO<sub>4</sub>, filtered, and concentrated under vacuum. The residue was purified by flash column chromatography on silica gel (hexane/ethyl acetate = 20:1) to give compound (S,Sp)-13 (89% yield, 53.8 mg, 0.18 mmol) as a yellow solid.

An oven-dried Schlenk tube was charged with compound (S,Sp)-13 (45.3 mg, 0.15 mmol, 1.0 equiv), DMAP (14.7 mg, 0.12 mmol, 0.8 equiv), Et<sub>3</sub>N (121 mg, 1.2 mmol, 8.0 equiv), and DCM (5.0 mL) under argon. Ac<sub>2</sub>O (30.6 mg, 0.30 mmol, 2.0 equiv) was slowly added to the mixture at room temperature. The mixture was stirred at room temperature for 8 h, quenched with H<sub>2</sub>O (2.0 mL), and extracted with ethyl acetate. The combined organic layers were dried over MgSO<sub>4</sub>, filtered, and concentrated under vacuum. Compound (S,Sp)-14 was obtained as a red oil, which was used for the next step without further purification.

Under argon, to a solution of compound (*S,S*)-**14** (34.4 mg, 0.10 mmol, 1.0 equiv) in HOAc (2.0 mL), HPPPh<sub>2</sub> (37.2 mg, 0.20 mmol, 2.0 equiv) was added dropwise. The mixture was stirred at 80 °C for 12 h, quenched with saturated NaHCO<sub>3</sub> solution (1.0 mL), and extracted with ethyl acetate. The combined organic layers were dried over MgSO<sub>4</sub>, filtered, and concentrated under vacuum. The residue was purified by flash column chromatography on silica gel (hexane/ethyl acetate = 20:1) to give compound (*S,S*)-**15** (60% yield, 28.2 mg, 0.060 mmol) as an orange solid.

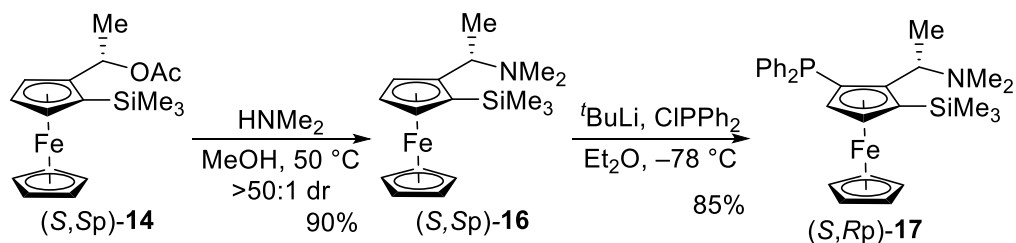

Under argon, to a solution of compound (*S,S*)-**14** (68.9 mg, 0.20 mmol, 1.0 equiv) in MeOH (5.0 mL), HNMe<sub>2</sub> (40 wt.% in H<sub>2</sub>O, 0.20 mL, 10 equiv) was added. The mixture was stirred at 50 °C for 6 h, quenched with phosphoric acid (1.0 M, 0.10 mL), and extracted with ethyl acetate. The combined organic layers were dried over MgSO<sub>4</sub>, filtered, and concentrated under vacuum. The residue was purified by flash column chromatography on silica gel (hexane/ ethyl acetate/ triethylamine = 20:1:1%) to give compound (*S,S*)-**16** (90% yield, 59.2 mg, 0.18 mmol) as an orange oil.

Under argon, to a solution of compound (*S,S*)-**16** (49.5 mg, 0.15 mmol, 1.0 equiv) in Et<sub>2</sub>O (5.0 mL), <sup>t</sup>BuLi (3.0 M in hexane, 76.7 μL, 0.23 mmol, 1.5 equiv) was added dropwise at -78 °C, and the mixture was stirred at room temperature for 2 h. ClPPh<sub>2</sub> (66.2 mg, 0.30 mmol, 2.0 equiv) was added to the mixture. The mixture was stirred at room temperature for 4 h, quenched with H<sub>2</sub>O (1.0 mL), and extracted with ethyl acetate. The combined organic layers were dried over MgSO<sub>4</sub>, filtered, and concentrated under vacuum. The residue was purified by flash column chromatography on silica gel (hexane/ethyl acetate/triethylamine = 10:1:1%) to give compound (*S,Rp*)-**17** (85% yield, 65.4 mg, 0.13 mmol) as a red solid.

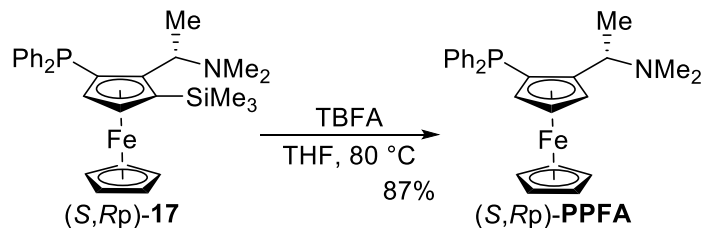

To a solution of (*S,Rp*)-**17** (51.3 mg, 0.10 mmol, 1.0 equiv) in THF (2.0 mL), TBFA (1.0 M in THF, 0.50 mL, 5.0 equiv) was added. The mixture was stirred at 80 °C for 8 h, quenched with H<sub>2</sub>O (2.0 mL), and extracted with ethyl acetate. The combined organic layers were dried over MgSO<sub>4</sub>, filtered, and concentrated under vacuum. The residue was purified by flash column chromatography on silica gel (hexane/ethyl acetate = 20:1) to give compound (*S,Rp*)-**PPFA** (87% yield, 38.4 mg, 0.087 mmol) as a red solid.

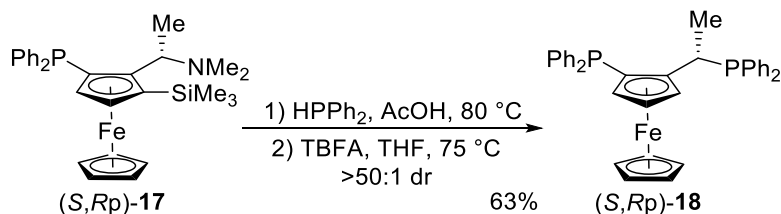

Under argon, to a solution of compound (*S,Sp*)-**17** (25.7 mg, 0.05 mmol, 1.0 equiv) in HOAc (2.0 mL), HPPH<sub>2</sub> (18.6 mg, 0.10 mmol, 2.0 equiv) was added dropwise. The mixture was stirred at 80 °C for 12 h, quenched with saturated NaHCO<sub>3</sub> solution (2.0 mL), and extracted with ethyl acetate. The combined organic layers were dried over MgSO<sub>4</sub>, filtered, and concentrated under vacuum. To a solution of the residue in THF (4.0 mL), TBFA (1.0 M in THF, 0.25 mL, 5.0 equiv) was added. The mixture was stirred at 75 °C for 8 h, quenched with H<sub>2</sub>O (1.0 mL), and extracted with ethyl acetate. The combined organic layers were dried over MgSO<sub>4</sub>, filtered, and concentrated under vacuum. The residue was purified by flash column chromatography on silica gel (hexane/ethyl acetate = 20:1) to give compound (*S,Rp*)-**18** (63% yield, 18.3 mg, 0.031 mmol) as a yellow solid.

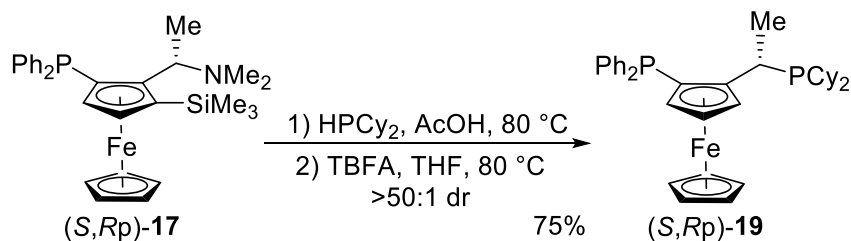

Under argon, to a solution of compound  $(S,Sp)\text{-17}$  (25.9 mg, 0.05 mmol, 1.0 equiv) in HOAc (2.0 mL),  $\text{HPCy}_2$  (19.9 mg, 0.10 mmol, 2.0 equiv) was added dropwise. The mixture was stirred at 80 °C for 12 h, quenched with saturated  $\text{NaHCO}_3$  solution (2.0 mL), and extracted with ethyl acetate. The combined organic layers were dried over  $\text{MgSO}_4$ , filtered, and concentrated under vacuum. To a solution of the residue in THF (4.0 mL), TBFA (1.0 M in THF, 0.25 mL, 5.0 equiv) was added. The mixture was stirred at 80 °C for 8 h, quenched with  $\text{H}_2\text{O}$  (1.0 mL), and extracted with ethyl acetate. The combined organic layers were dried over  $\text{MgSO}_4$ , filtered, and concentrated under vacuum. The residue was purified by flash column chromatography on silica gel (hexane/ethyl acetate = 20:1) to give compound  $(S,Rp)\text{-19}$  (75% yield, 21.9 mg, 0.038 mmol) as a red solid.

#### 7.4 Palladium-catalyzed asymmetric allylic alkylation

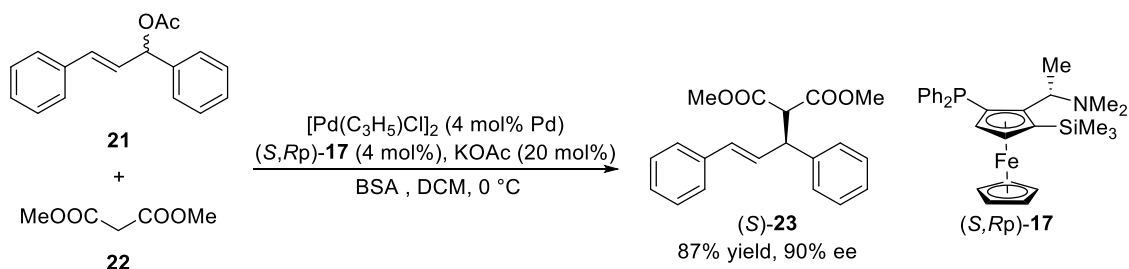

An oven-dried Schlenk tube was charged with compound ligand  $(S,Rp)\text{-17}$  (2.1 mg, 0.004 mmol, 4 mol%),  $[\text{Pd}(\text{C}_3\text{H}_5)\text{Cl}]_2$  (1.4 mg, 0.004 mmol, 4 mol%), and DCM (1.0 mL) under argon. The mixture was stirred at room temperature for 20 min. Compound **21** (25.2 mg, 0.10 mmol, 1.0 equiv) was added. After an additional 20 min, dimethyl malonate **22** (39.6 mg, 0.30 mmol, 3.0 equiv), BSA (40.7 mg, 0.20 mmol, 2.0 equiv), and KOAc (1.90 mg, 0.02 mmol, 20 mol%) were added. The mixture was stirred at 0 °C for 6 h, quenched with saturated  $\text{NH}_4\text{Cl}$  solution, and extracted with ethyl acetate. The combined organic layers were dried over  $\text{MgSO}_4$ , filtered, and concentrated under vacuum. The residue was

purified by flash column chromatography on silica gel (hexane/ethyl acetate = 10:1) to give compound (*S*)-**23** (87% yield, 28.2 mg, 0.087 mmol) as a colorless solid.

## 8. Characterization of the products

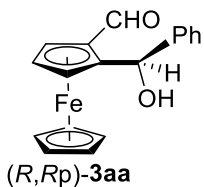

**Compound (R,Rp)-3aa.** (Table 2, entry 1, 29.8 mg, 93% yield, 0.093 mmol, a red solid, eluent: hexane/ethyl acetate (5/1),  $R_f = 0.4$ ). The ee was measured by HPLC (Chiralpak IB N-5 column, hexane/2-propanol = 90/10, 1.0 mL/min, 230 nm,  $t_{\text{major}} = 16.7$  min,  $t_{\text{minor}} = 14.9$  min);  $[\alpha]_{\text{D}}^{25} -7.4 \times 10^2$  ( $c$  0.38,  $\text{CHCl}_3$ ) for >99.5% ee.  **$^1\text{H NMR}$**  (600 MHz,  $\text{CDCl}_3$ )  $\delta$  9.96 (s, 1H), 7.50 (d,  $J = 7.6$  Hz, 2H), 7.38 (t,  $J = 7.5$  Hz, 2H), 7.30 (t,  $J = 7.4$  Hz, 1H), 5.80 (s, 1H), 4.71–4.70 (m, 1H), 4.50 (d,  $J = 2.3$  Hz, 1H), 4.48 (t,  $J = 2.7$  Hz, 1H), 4.39 (s, 5H), 4.25 (s, 1H);  **$^{13}\text{C NMR}$**  (150 MHz,  $\text{CDCl}_3$ )  $\delta$  195.8, 142.3, 128.1, 127.6, 126.7, 97.4, 74.9, 73.1, 71.5, 70.4, 69.5, 69.1; **HRMS (ESI)** calcd for  $\text{C}_{18}\text{H}_{16}\text{FeO}_2\text{Na}$   $[\text{M}+\text{Na}]^+$  343.0392, found 343.0396.

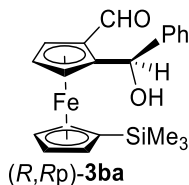

**Compound (R,Rp)-3ba.** (Table 2, entry 2, 34.5 mg, 88% yield, 0.088 mmol, a red solid, eluent: hexane /ethyl acetate (5/1),  $R_f = 0.4$ ). The ee was measured by HPLC (Chiralpak IA column, hexane/2-propanol = 90/10, 1.0 mL/min, 230 nm,  $t_{\text{major}} = 9.2$  min,  $t_{\text{minor}} = 8.1$  min);  $[\alpha]_{\text{D}}^{25} -6.6 \times 10^2$  ( $c$  0.12,  $\text{CHCl}_3$ ) for 94% ee.  **$^1\text{H NMR}$**  (600 MHz,  $\text{CDCl}_3$ ):  $\delta$  9.96 (s, 1H), 7.49 (d,  $J = 7.0$  Hz, 2H), 7.37 (t,  $J = 7.6$  Hz, 2H), 7.30 (t,  $J = 7.4$  Hz, 1H), 5.81 (s, 1H), 4.77 (s, 1H), 4.65 (s, 1H), 4.60 (s, 1H), 4.43 (t,  $J = 2.6$  Hz, 1H), 4.35–4.34 (m, 2H), 4.29 (s, 1H), 4.12 (s, 1H), 0.19 (s, 9H).  **$^{13}\text{C NMR}$**  (150 MHz,  $\text{CDCl}_3$ ):  $\delta$  195.6, 142.4, 128.2, 127.6, 126.7, 97.0, 75.1, 74.8, 74.5, 74.1, 73.5, 73.4, 71.8, 69.6, -0.4; **HRMS (ESI)** calcd for  $\text{C}_{21}\text{H}_{24}\text{FeO}_2\text{SiNa}$   $[\text{M}+\text{Na}]^+$  415.0787, found 415.0780.

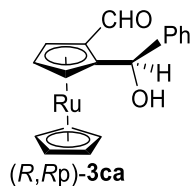

**Compound (R,Rp)-3ca.** (Table 2, entry 3, 28.1 mg, 77% yield, 0.077 mmol, a yellow solid, eluent: hexane/ethyl acetate (5/1),  $R_f = 0.4$ ). The ee was measured by HPLC (Chiralpak IJ column, hexane/2-propanol = 90/10, 1.0 mL/min, 230 nm,  $t_{\text{major}} = 31.1$  min,  $t_{\text{minor}} = 38.5$  min);  $[\alpha]_D^{25} -3.4 \times 10^2$  ( $c$  0.20,  $\text{CHCl}_3$ ) for 86% ee.  **$^1\text{H NMR}$**  (600 MHz,  $\text{CDCl}_3$ ):  $\delta$  9.82 (s, 1H), 7.45 (d,  $J = 7.2$  Hz, 2H), 7.34 (t,  $J = 7.5$  Hz, 2H), 7.28 (t,  $J = 7.3$  Hz, 1H), 5.74 (s, 1H), 4.98 (s, 1H), 4.75 (s, 5H), 4.72 (t,  $J = 2.6$  Hz, 1H), 4.50 (s, 1H), 3.83 (d,  $J = 2.3$  Hz, 1H);  **$^{13}\text{C NMR}$**  (150 MHz,  $\text{CDCl}_3$ ):  $\delta$  192.0, 142.0, 128.1, 127.6, 126.6, 100.7, 81.4, 76.0, 74.1, 73.1, 72.9, 68.4; **HRMS (ESI)** calcd for  $\text{C}_{18}\text{H}_{16}\text{O}_2\text{RuNa}$   $[\text{M}+\text{Na}]^+$  389.0086, found 389.0095.

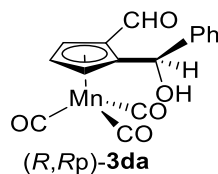

**Compound (R,Rp)-3da.** (Table 2, entry 4, 24.7 mg, 73% yield, 0.073 mmol, a deep green solid, eluent: hexane/ethyl acetate (5/1),  $R_f = 0.4$ ). The ee was measured by HPLC (Chiralpak IJ column, hexane/2-propanol = 90/10, 1.0 mL/min, 230 nm,  $t_{\text{major}} = 32.2$  min,  $t_{\text{minor}} = 38.0$  min);  $[\alpha]_D^{25} -1.9 \times 10^2$  ( $c$  0.17,  $\text{CHCl}_3$ ) for 89% ee.  **$^1\text{H NMR}$**  (600 MHz,  $\text{CDCl}_3$ ):  $\delta$  9.61 (s, 1H), 7.48 (d,  $J = 7.5$  Hz, 2H), 7.38 (t,  $J = 7.5$  Hz, 2H), 7.33 (t,  $J = 7.5$  Hz, 1H), 5.93 (s, 1H), 5.38 (s, 1H), 4.89 (s, 1H), 4.70 (s, 1H), 3.51 (s, 1H);  **$^{13}\text{C NMR}$**  (150 MHz,  $\text{CDCl}_3$ ):  $\delta$  222.2, 188.4, 141.4, 128.7, 128.5, 126.7, 114.8, 90.0, 87.9, 86.0, 80.0, 68.8; **HRMS (ESI)** calcd for  $\text{C}_{16}\text{H}_{11}\text{MnO}_5\text{Na}$   $[\text{M}+\text{Na}]^+$  360.9879, found 360.9882.

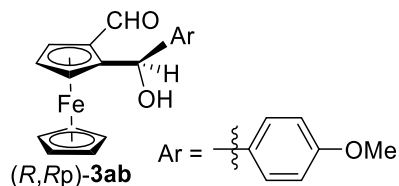

**Compound (R,Rp)-3ab.** (Table 2, entry 5, 30.1 mg, 86% yield, 0.086 mmol, a deep green solid, eluent: hexane/ethyl acetate (5/1),  $R_f = 0.4$ ). The ee was measured by HPLC

(Chiralpak IB N-5 column, hexane/2-propanol = 90/10, 0.5 mL/min, 230 nm,  $t_{\text{major}} = 39.8$  min,  $t_{\text{minor}} = 37.2$  min);  $[\alpha]_{\text{D}}^{25} -7.9 \times 10^2$  ( $c$  0.12,  $\text{CHCl}_3$ ) for >99.5% ee.  **$^1\text{H NMR}$**  (600 MHz,  $\text{CDCl}_3$ ):  $\delta$  9.95 (s, 1H), 7.41 (d,  $J = 8.2$  Hz, 2H), 6.90 (d,  $J = 8.2$  Hz, 2H), 5.77 (s, 1H), 4.70 (s, 1H), 4.48 (t,  $J = 2.9$  Hz, 1H), 4.38 (s, 5H), 4.32 (s, 1H), 4.30 (s, 1H), 3.82 (s, 3H);  **$^{13}\text{C NMR}$**  (150 MHz,  $\text{CDCl}_3$ ):  $\delta$  195.7, 159.1, 134.7, 127.9, 113.6, 97.6, 75.0, 74.7, 73.1, 71.4, 70.4, 69.2, 55.3; **HRMS (ESI)** calcd for  $\text{C}_{19}\text{H}_{18}\text{FeO}_3\text{Na}$   $[\text{M}+\text{Na}]^+$  373.0497, found 373.0503.

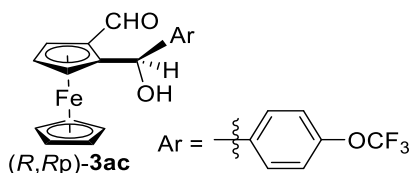

**Compound (R,Rp)-3ac.** (Table 2, entry 6, 33.1 mg, 82% yield, 0.082 mmol, a red solid, eluent: hexane/ethyl acetate (5/1),  $R_f = 0.4$ ). The ee was measured by HPLC (Chiralpak IC column, hexane/2-propanol = 80/20, 1.0 mL/min, 230 nm,  $t_{\text{major}} = 6.8$  min,  $t_{\text{minor}} = 5.7$  min);  $[\alpha]_{\text{D}}^{25} -5.8 \times 10^2$  ( $c$  0.070,  $\text{CHCl}_3$ ) for 92% ee.  **$^1\text{H NMR}$**  (600 MHz,  $\text{CDCl}_3$ ):  $\delta$  9.95 (s, 1H), 7.54 (d,  $J = 8.6$  Hz, 2H), 7.22 (d,  $J = 8.2$  Hz, 2H), 5.81 (s, 1H), 4.73–4.70 (m, 1H), 4.58 (d,  $J = 2.2$  Hz, 1H), 4.50 (t,  $J = 2.7$  Hz, 1H), 4.39 (s, 5H), 4.23 (s, 1H);  **$^{13}\text{C NMR}$**  (150 MHz,  $\text{CDCl}_3$ ):  $\delta$  195.8, 148.6, 141.0, 128.2, 120.6, 120.5 (q,  $J_{\text{C},^{19}\text{F}} = 255.2$  Hz), 96.9, 75.0, 74.6, 73.5, 71.6, 70.4, 68.9; **HRMS (ESI)** calcd for  $\text{C}_{19}\text{H}_{15}\text{F}_3\text{FeO}_3\text{Na}$   $[\text{M}+\text{Na}]^+$  427.0215, found 427.0218.

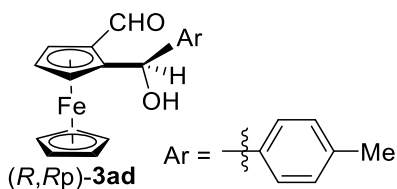

**Compound (R,Rp)-3ad.** (Table 2, entry 7, 28.4 mg, 85% yield, 0.085 mmol, a red solid, eluent: hexane/ethyl acetate (5/1),  $R_f = 0.4$ ). The ee was measured by HPLC (Chiralpak IA column, hexane/2-propanol = 90/10, 1.0 mL/min, 230 nm,  $t_{\text{major}} = 16.2$  min,  $t_{\text{minor}} = 14.6$  min);  $[\alpha]_{\text{D}}^{25} -6.0 \times 10^2$  ( $c$  0.13,  $\text{CHCl}_3$ ) for 99% ee.  **$^1\text{H NMR}$**  (600 MHz,  $\text{CDCl}_3$ ):  $\delta$  9.96 (s, 1H), 7.38 (d,  $J = 7.6$  Hz, 2H), 7.18 (d,  $J = 7.6$  Hz, 2H), 5.77 (s, 1H), 4.70 (s, 1H), 4.48 (s, 1H), 4.38 (s, 5+1H), 4.28 (s, 1H), 2.36 (s, 3H);  **$^{13}\text{C NMR}$**  (150 MHz,  $\text{CDCl}_3$ ):  $\delta$



195.8, 139.4, 137.2, 128.9, 126.7, 97.5, 74.90, 74.88, 73.1, 71.5, 70.4, 69.4, 21.2. **HRMS (ESI)** calcd for C<sub>19</sub>H<sub>18</sub>FeO<sub>2</sub>Na [M+Na]<sup>+</sup> 357.0548, found 357.0551.

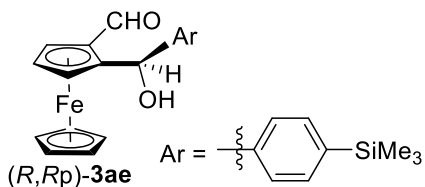

**Compound (R,Rp)-3ae.** (Table 2, entry 8, 34.1 mg, 87% yield, 0.087 mmol, a red solid, eluent: hexane/ethyl acetate (5/1),  $R_f = 0.4$ ). The ee was measured by HPLC (Chiralpak IJ column, hexane/2-propanol = 95/5, 0.8 mL/min, 230 nm,  $t_{\text{major}} = 21.7$  min,  $t_{\text{minor}} = 25.2$  min);  $[\alpha]^{25}_{\text{D}} -6.3 \times 10^2$  ( $c$  0.29, CHCl<sub>3</sub>) for >99.5% ee. **<sup>1</sup>H NMR** (600 MHz, CDCl<sub>3</sub>)  $\delta$  9.97 (s, 1H), 7.52 (d,  $J = 7.4$  Hz, 2H), 7.47 (d,  $J = 7.6$  Hz, 2H), 5.80 (s, 1H), 4.70 (s, 1H), 4.49 (s, 1H), 4.39 (s, 5H), 4.33 (s, 1+1H),  $-0.27$  (s, 9H); **<sup>13</sup>C NMR** (150 MHz, CDCl<sub>3</sub>):  $\delta$  195.6, 142.9, 139.7, 133.2, 126.1, 97.2, 75.1, 74.7, 73.0, 71.5, 70.4, 69.6,  $-1.1$ . **HRMS (ESI)** calcd for C<sub>21</sub>H<sub>24</sub>FeO<sub>2</sub>SiNa [M+Na]<sup>+</sup> 415.0787, found 415.0791.

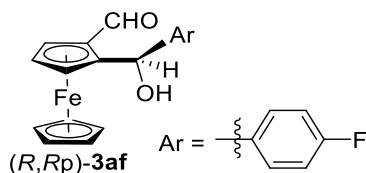

**Compound (R,Rp)-3af.** (Table 2, entry 9, 27.7 mg, 82% yield, 0.082 mmol, a red solid, eluent: hexane/ethyl acetate (5/1),  $R_f = 0.4$ ). The ee was measured by HPLC (Chiralpak IA column, hexane/2-propanol = 90/10, 1.0 mL/min, 230 nm,  $t_{\text{major}} = 15.9$  min,  $t_{\text{minor}} = 15.0$  min);  $[\alpha]^{25}_{\text{D}} -7.4 \times 10^2$  ( $c$  0.18, CHCl<sub>3</sub>) for 95% ee. **<sup>1</sup>H NMR** (600 MHz, CDCl<sub>3</sub>):  $\delta$  9.94 (s, 1H), 7.48 (dd,  $J = 8.5$  Hz, 5.5 Hz, 2H), 7.06 (dd,  $J = 8.6$  Hz, 8.5 Hz, 2H), 5.78 (s, 1H), 4.71 (s, 1H), 4.57 (s, 1H), 4.49 (t,  $J = 2.8$  Hz, 1H), 4.38 (s, 5H), 4.22 (s, 1H); **<sup>13</sup>C NMR** (150 MHz, CDCl<sub>3</sub>):  $\delta$  195.8, 162.2 (d,  $J_{\text{C},^{19}\text{F}} = 244.0$  Hz), 138.2 (d,  $J_{\text{C},^{19}\text{F}} = 3.2$  Hz), 128.4 (d,  $J_{\text{C},^{19}\text{F}} = 8.0$  Hz), 115.0 (d,  $J_{\text{C},^{19}\text{F}} = 21.2$  Hz), 97.2, 74.9, 74.7, 73.4, 71.5, 70.4, 68.9; **HRMS (ESI)** calcd for C<sub>18</sub>H<sub>15</sub>FFeO<sub>2</sub>Na [M+Na]<sup>+</sup> 361.0298, found 361.0301.

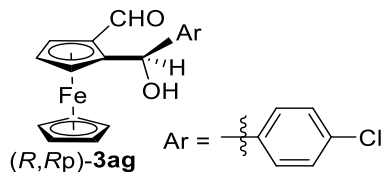

**Compound (R,Rp)-3ag.** (Table 2, entry 10, 28.4 mg, 80% yield, 0.080 mmol, a red solid, eluent: hexane/ethyl acetate (5/1),  $R_f = 0.4$ ). The ee was measured by HPLC (Chiralpak IA column, hexane/2-propanol = 90/10, 0.6 mL/min, 230 nm,  $t_{\text{major}} = 36.5$  min,  $t_{\text{minor}} = 30.8$  min);  $[\alpha]_D^{25} -6.9 \times 10^2$  ( $c$  0.19,  $\text{CHCl}_3$ ) for 96% ee.  **$^1\text{H NMR}$**  (600 MHz,  $\text{CDCl}_3$ ):  $\delta$  9.94 (s, 1H), 7.45 (d,  $J = 8.6$  Hz, 2H), 7.35 (d,  $J = 8.3$  Hz, 2H), 5.78 (s, 1H), 4.71 (s, 1H), 4.63 (s, 1H), 4.49 (t,  $J = 2.6$  Hz, 1H), 4.38 (s, 5H), 4.21 (s, 1H);  **$^{13}\text{C NMR}$**  (150 MHz,  $\text{CDCl}_3$ ):  $\delta$  196.0, 140.8, 133.2, 128.3, 128.2, 97.0, 74.9, 73.5, 71.6, 71.2, 70.4, 68.9; **HRMS (ESI)** calcd for  $\text{C}_{18}\text{H}_{15}\text{ClFeO}_2\text{Na}$   $[\text{M}+\text{Na}]^+$  377.0002, found 377.0005.

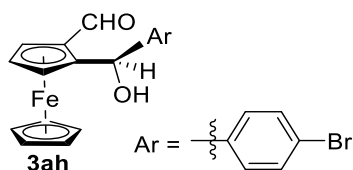

**Compound (R,Rp)-3ah.** (Table 2, entry 11, 31.1 mg, 78% yield, 0.078 mmol, a red solid, eluent: hexane/ethyl acetate (5/1),  $R_f = 0.4$ ). The ee was measured by HPLC (Chiralpak IA column, hexane/2-propanol = 90/10, 1.0 mL/min, 230 nm,  $t_{\text{major}} = 19.7$  min,  $t_{\text{minor}} = 16.8$  min);  $[\alpha]_D^{25} -8.9 \times 10^2$  ( $c$  0.15,  $\text{CHCl}_3$ ) for 98% ee.  **$^1\text{H NMR}$**  (600 MHz,  $\text{CDCl}_3$ ):  $\delta$  9.94 (s, 1H), 7.51 (d,  $J = 8.1$  Hz, 2H), 7.39 (d,  $J = 8.1$  Hz, 2H), 5.75 (s, 1H), 4.71 (s, 1H), 4.65 (s, 1H), 4.49 (t,  $J = 2.7$  Hz, 1H), 4.38 (s, 5H), 4.20 (s, 1H);  **$^{13}\text{C NMR}$**  (150 MHz,  $\text{CDCl}_3$ ):  $\delta$  196.0, 141.3, 131.3, 128.5, 121.4, 96.9, 74.9, 74.8, 73.6, 71.6, 70.4, 68.9; **HRMS (ESI)** calcd for  $\text{C}_{18}\text{H}_{15}\text{BrFeO}_2\text{Na}$   $[\text{M}+\text{Na}]^+$  420.9497, found 420.9508. The absolute configuration was determined by X-ray analysis (CCDC 2403094).

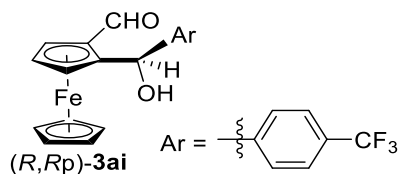

**Compound (R,Rp)-3ai.** (Table 2, entry 12, 29.5 mg, 76% yield, 0.076 mmol, a red solid, eluent: hexane/ethyl acetate (5/1),  $R_f = 0.4$ ). The ee was measured by HPLC (Chiralpak IA column, hexane/2-propanol = 90/10, 1.0 mL/min, 230 nm,  $t_{\text{major}} = 13.5$  min,

$t_{\text{minor}} = 12.5$  min);  $[\alpha]_{\text{D}}^{25} -7.4 \times 10^2$  ( $c$  0.14,  $\text{CHCl}_3$ ) for 84% ee.  **$^1\text{H NMR}$**  (600 MHz,  $\text{CDCl}_3$ ):  $\delta$  9.96 (s, 1H), 7.64 (s, 2+2H), 5.86 (s, 1H), 4.73–4.71 (m, 1H), 4.69 (d,  $J = 2.2$  Hz, 1H), 4.50 (t,  $J = 2.6$  Hz, 1H), 4.39 (s, 5H), 4.19 (s, 1H);  **$^{13}\text{C NMR}$**  (150 MHz,  $\text{CDCl}_3$ )  $\delta$  195.9, 146.3, 129.8 (q,  $J_{\text{C},^{19}\text{F}} = 32.1$  Hz), 127.1, 125.1 (q,  $J_{\text{C},^{19}\text{F}} = 3.8$  Hz), 124.2 (q,  $J_{\text{C},^{19}\text{F}} = 270.3$  Hz), 96.6, 75.0, 74.6, 73.6, 71.7, 70.5, 69.0; **HRMS (ESI)** calcd for  $\text{C}_{19}\text{H}_{15}\text{F}_3\text{FeO}_2\text{Na}$   $[\text{M}+\text{Na}]^+$  411.0266, found 411.0270.

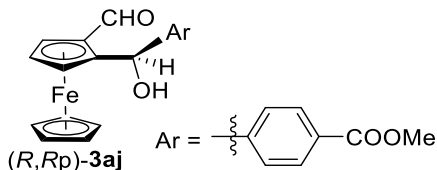

**Compound (R,Rp)-3aj.** (Table 2, entry 13, 30.3 mg, 80% yield, 0.080 mmol, a red solid, eluent: hexane/ethyl acetate (5/1),  $R_f = 0.4$ ). The ee was measured by HPLC (Chiralpak IC column, hexane/2-propanol = 80/20, 1.0 mL/min, 230 nm,  $t_{\text{major}} = 22.6$  min,  $t_{\text{minor}} = 18.9$  min);  $[\alpha]_{\text{D}}^{25} -7.6 \times 10^2$  ( $c$  0.11,  $\text{CHCl}_3$ ) for 89% ee.  **$^1\text{H NMR}$**  (600 MHz,  $\text{CDCl}_3$ ):  $\delta$  9.95 (s, 1H), 8.06 (d,  $J = 8.1$  Hz, 2H), 7.60 (d,  $J = 8.0$  Hz, 2H), 5.83 (s, 1H), 4.82 (d,  $J = 2.2$  Hz, 1H), 4.71 (dd,  $J = 2.6$  Hz, 1.6 Hz, 1H), 4.48 (t,  $J = 2.7$  Hz, 1H), 4.38 (s, 5H), 4.15 (s, 1H), 3.93 (s, 3H);  **$^{13}\text{C NMR}$**  (150 MHz,  $\text{CDCl}_3$ ):  $\delta$  196.1, 167.0, 147.3, 129.5, 129.4, 126.8, 96.8, 75.0, 73.6, 71.6, 70.9, 70.5, 69.1, 52.1; **HRMS (ESI)** calcd for  $\text{C}_{20}\text{H}_{18}\text{FeO}_4\text{Na}$   $[\text{M}+\text{Na}]^+$  401.0447, found 401.0454.

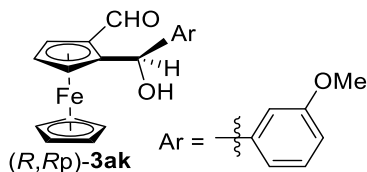

**Compound (R,Rp)-3ak.** (Table 2, entry 14, 27.3 mg, 78% yield, 0.078 mmol, a red solid, eluent: hexane/ethyl acetate (5/1),  $R_f = 0.4$ ). The ee was measured by HPLC (Chiralpak IB N-5 column, hexane/2-propanol = 90/10, 0.8 mL/min, 230 nm,  $t_{\text{major}} = 34.9$  min,  $t_{\text{minor}} = 41.7$  min);  $[\alpha]_{\text{D}}^{25} -6.2 \times 10^2$  ( $c$  0.19,  $\text{CHCl}_3$ ) for 89% ee.  **$^1\text{H NMR}$**  (600 MHz,  $\text{CDCl}_3$ ):  $\delta$  9.96 (s, 1H), 7.28 (t,  $J = 7.9$  Hz, 1H), 7.09 (s, 1H), 7.06 (d,  $J = 7.6$  Hz, 1H), 6.85 (dd,  $J = 8.2$  Hz, 2.6 Hz, 1H), 5.77 (s, 1H), 4.71–4.69 (m, 1H), 4.52 (s, 1H), 4.49 (t,  $J = 2.6$  Hz, 1H), 4.39 (s, 5H), 4.29 (s, 1H), 3.83 (s, 3H);  **$^{13}\text{C NMR}$**  (150 MHz,  $\text{CDCl}_3$ ):  $\delta$  195.8,

159.6, 143.9, 129.1, 119.2, 113.2, 112.2, 97.3, 74.9, 73.1, 71.5, 71.2, 70.4, 69.4, 55.2.

**HRMS (ESI)** calcd for  $C_{19}H_{18}FeO_3Na$   $[M+Na]^+$  373.0497, found 373.0502.

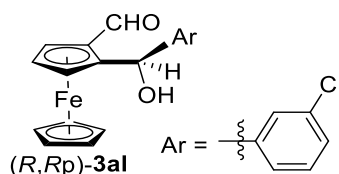

**Compound (R,Rp)-3al.** (Table 2, entry 15, 28.7 mg, 81% yield, 0.081 mmol, a red solid, eluent: hexane/ethyl acetate (5/1),  $R_f = 0.4$ ). The ee was measured by HPLC (Chiralpak IA column, hexane/2-propanol = 90/10, 1.0 mL/min, 230 nm,  $t_{major} = 19.2$  min,  $t_{minor} = 14.0$  min);  $[\alpha]_D^{25} -8.3 \times 10^2$  ( $c$  0.25,  $CHCl_3$ ) for 89% ee.  **$^1H$  NMR** (600 MHz,  $CDCl_3$ ):  $\delta$  9.94 (s, 1H), 7.54 (s, 1H), 7.36 (d,  $J = 6.9$  Hz, 1H), 7.31–7.27 (m, 2H), 5.75 (s, 1H), 4.71 (s, 1H), 4.68 (s, 1H), 4.50 (t,  $J = 2.8$  Hz, 1H), 4.39 (s, 5H), 4.22 (s, 1H);  **$^{13}C$  NMR** (150 MHz,  $CDCl_3$ ):  $\delta$  195.9, 144.3, 134.1, 129.4, 127.7, 127.0, 125.1, 96.8, 74.9, 73.5, 71.6, 71.2, 70.4, 69.0. **HRMS (ESI)** calcd for  $C_{18}H_{15}ClFeO_2Na$   $[M+Na]^+$  377.0002, found 377.0007.

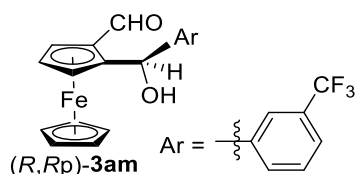

**Compound (R,Rp)-3am.** (Table 2, entry 16, 30.7 mg, 79% yield, 0.079 mmol, a red solid, eluent: hexane/ethyl acetate (5/1),  $R_f = 0.4$ ). The ee was measured by HPLC (Chiralpak IA column, hexane/2-propanol = 90/10, 1.0 mL/min, 230 nm,  $t_{major} = 12.4$  min,  $t_{minor} = 10.0$  min);  $[\alpha]_D^{25} -7.4 \times 10^2$  ( $c$  0.14,  $CHCl_3$ ) for 90% ee.  **$^1H$  NMR** (600 MHz,  $CDCl_3$ ):  $\delta$  9.95 (s, 1H), 7.86 (s, 1H), 7.67 (d,  $J = 7.7$  Hz, 1H), 7.59 (d,  $J = 7.8$  Hz, 1H), 7.50 (t,  $J = 7.7$  Hz, 1H), 5.82 (s, 1H), 4.91 (s, 1H), 4.72 (s, 1H), 4.50 (t,  $J = 2.8$  Hz, 1H), 4.39 (s, 5H), 4.10 (s, 1H);  **$^{13}C$  NMR** (150 MHz,  $CDCl_3$ )  $\delta$  196.1, 143.3, 130.6 (q,  $J_C, ^{19}F = 32.0$  Hz), 130.3, 128.5, 124.4 (q,  $J_C, ^{19}F = 3.8$  Hz), 124.2 (q,  $J_C, ^{19}F = 270.7$  Hz), 123.7 (q,  $J_C, ^{19}F = 3.8$  Hz), 96.9, 75.0, 74.8, 73.7, 71.7, 70.4, 69.0; **HRMS (ESI)** calcd for  $C_{19}H_{15}F_3FeO_2Na$   $[M+Na]^+$  411.0266, found 411.0271.

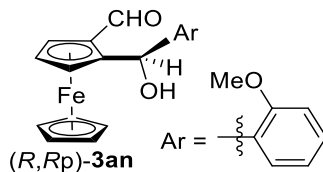

**Compound (R,Rp)-3an.** (Table 2, entry 17, 29.1 mg, 83% yield, 0.083 mmol, a red solid, eluent: hexane/ethyl acetate (5/1),  $R_f = 0.4$ ). The ee was measured by HPLC (Chiralpak IB N-5 column, hexane/2-propanol = 90/10, 0.5 mL/min, 230 nm,  $t_{\text{major}} = 26.8$  min,  $t_{\text{minor}} = 31.6$  min);  $[\alpha]_{\text{D}}^{25} -6.5 \times 10^2$  ( $c$  0.18,  $\text{CHCl}_3$ ) for >99.5% ee.  **$^1\text{H NMR}$**  (600 MHz,  $\text{CDCl}_3$ ):  $\delta$  9.99 (s, 1H), 7.58 (dd,  $J = 7.4$  Hz, 1.7 Hz, 1H), 7.29–7.26 (m, 1H), 7.01 (t,  $J = 7.5$  Hz, 1H), 6.88 (d,  $J = 8.2$  Hz, 1H), 6.07 (d,  $J = 3.1$  Hz, 1H), 4.73–4.70 (m, 1H), 4.58 (d,  $J = 3.1$  Hz, 1H), 4.50 (t,  $J = 2.7$  Hz, 1H), 4.36 (s, 5H), 4.32 (s, 1H), 3.80 (s, 3H);  **$^{13}\text{C NMR}$**  (150 MHz,  $\text{CDCl}_3$ ):  $\delta$  195.5, 156.1, 131.1, 128.5, 127.2, 120.7, 110.2, 96.4, 75.2, 74.8, 71.9, 71.4, 70.3, 64.1, 55.3; **HRMS (ESI)** calcd for  $\text{C}_{19}\text{H}_{18}\text{FeO}_3\text{Na}$   $[\text{M}+\text{Na}]^+$  373.0497, found 373.0503.

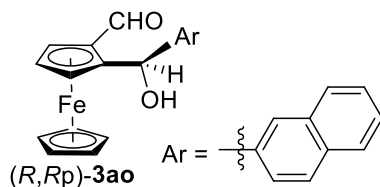

**Compound (R,Rp)-3ao.** (Table 2, entry 18, 29.6 mg, 80% yield, 0.080 mmol, a red solid, eluent: hexane/ethyl acetate (5/1),  $R_f = 0.4$ ). The ee was measured by HPLC (Chiralpak IB N-5 column, hexane/2-propanol = 80/20, 0.8 mL/min, 230 nm,  $t_{\text{major}} = 17.0$  min,  $t_{\text{minor}} = 16.0$  min);  $[\alpha]_{\text{D}}^{25} -7.9 \times 10^2$  ( $c$  0.14,  $\text{CHCl}_3$ ) for 91% ee.  **$^1\text{H NMR}$**  (600 MHz,  $\text{CDCl}_3$ ):  $\delta$  9.99 (s, 1H), 7.98 (s, 1H), 7.89–7.83 (m, 3H), 7.62 (dd,  $J = 8.4$  Hz, 1.7 Hz, 1H), 7.51–7.45 (m, 2H), 5.97 (s, 1H), 4.72–4.70 (m, 1H), 4.66 (d,  $J = 2.2$  Hz, 1H), 4.47 (t,  $J = 2.7$  Hz, 1H), 4.40 (s, 5H), 4.25 (s, 1H);  **$^{13}\text{C NMR}$**  (150 MHz,  $\text{CDCl}_3$ ):  $\delta$  195.8, 139.8, 133.3, 133.1, 128.1, 127.8, 127.7, 126.0, 125.8, 125.5, 125.1, 97.4, 75.1, 73.2, 71.5, 70.5, 69.6; **HRMS (ESI)** calcd for  $\text{C}_{22}\text{H}_{18}\text{FeO}_2\text{Na}$   $[\text{M}+\text{Na}]^+$  393.0548, found 393.0553.

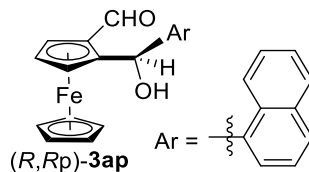

**Compound (R,Rp)-3ap.** (Table 2, entry 19, 28.9 mg, 78% yield, 0.078 mmol, a red solid, eluent: hexane/ethyl acetate (5/1),  $R_f = 0.4$ ). The ee was measured by HPLC (Chiralpak IF column, hexane/2-propanol = 85/15, 1.0 mL/min, 230 nm,  $t_{\text{major}} = 44.8$  min,  $t_{\text{minor}} = 13.9$  min);  $[\alpha]_{\text{D}}^{25} -1.0 \times 10^3$  ( $c$  0.24,  $\text{CHCl}_3$ ) for >99.5% ee.  **$^1\text{H NMR}$**  (600 MHz,  $\text{CDCl}_3$ ):  $\delta$  10.0 (s, 1H), 7.98 (d,  $J = 7.2$  Hz, 1H), 7.89 (d,  $J = 8.1$  Hz, 1H), 7.85 (d,  $J = 8.2$  Hz, 1H), 7.82 (d,  $J = 8.4$  Hz, 1H), 7.59 (t,  $J = 7.7$  Hz, 1H), 7.46 (t,  $J = 7.4$  Hz, 1H), 7.42 (t,  $J = 7.6$  Hz, 1H), 6.46 (s, 1H), 5.25 (s, 1H), 4.71 (s, 1H), 4.40–4.39 (m, 1+5H), 3.91 (s, 1H);  **$^{13}\text{C NMR}$**  (150 MHz,  $\text{CDCl}_3$ ):  $\delta$  196.6, 137.9, 133.4, 130.9, 128.7, 128.0, 126.0, 125.6, 125.4, 124.1, 123.6, 97.0, 74.7, 73.2, 71.6, 71.5, 70.5, 65.4; **HRMS (ESI)** calcd for  $\text{C}_{22}\text{H}_{18}\text{FeO}_2\text{Na}$   $[\text{M}+\text{Na}]^+$  393.0548, found 393.0552.

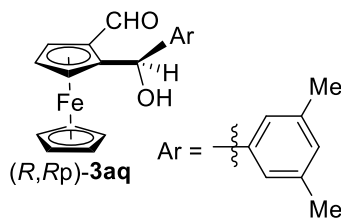

**Compound (R,Rp)-3aq.** (Table 2, entry 20, 29.6 mg, 85% yield, 0.085 mmol, a red solid, eluent: hexane/ethyl acetate (5/1),  $R_f = 0.4$ ). The ee was measured by HPLC (Chiralpak IA column, hexane/2-propanol = 90/10, 0.5 mL/min, 230 nm,  $t_{\text{major}} = 30.6$  min,  $t_{\text{minor}} = 25.8$  min);  $[\alpha]_{\text{D}}^{25} -6.2 \times 10^2$  ( $c$  0.19,  $\text{CHCl}_3$ ) for 92% ee.  **$^1\text{H NMR}$**  (600 MHz,  $\text{CDCl}_3$ ):  $\delta$  9.97 (s, 1H), 7.10 (s, 2H), 6.93 (s, 1H), 5.73 (d,  $J = 2.2$  Hz, 1H), 4.72–4.68 (m, 1H), 4.49 (t,  $J = 2.7$  Hz, 1H), 4.38 (s, 5H), 4.33 (s, 1H), 4.28 (d,  $J = 2.3$  Hz, 1H), 2.33 (s, 6H);  **$^{13}\text{C NMR}$**  (150 MHz,  $\text{CDCl}_3$ ):  $\delta$  195.6, 142.3, 137.6, 129.2, 124.6, 97.5, 75.1, 74.8, 72.9, 71.5, 70.4, 69.6, 21.4; **HRMS (ESI)** calcd for  $\text{C}_{20}\text{H}_{20}\text{FeO}_2\text{Na}$   $[\text{M}+\text{Na}]^+$  371.0705, found 371.0708.

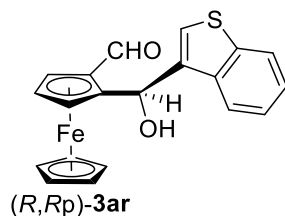

**Compound (R,Rp)-3ar.** (Table 2, entry 21, 21.8 mg, 58% yield, 0.058 mmol, a red solid, eluent: hexane/ethyl acetate (5/1),  $R_f = 0.4$ ). The ee was measured by HPLC (Chiralpak IJ column, hexane/2-propanol = 90/10, 1.0 mL/min, 230 nm,  $t_{\text{major}} = 75.0$  min,  $t_{\text{minor}} = 53.1$  min);  $[\alpha]_D^{25} -5.0 \times 10^2$  ( $c$  0.11,  $\text{CHCl}_3$ ) for 85% ee.  **$^1\text{H NMR}$**  (600 MHz,  $\text{CDCl}_3$ ):  $\delta$  9.97 (s, 1H), 7.88 (d,  $J = 7.4$  Hz, 1H), 7.68 (d,  $J = 7.5$  Hz, 1H), 7.63 (s, 1H), 7.36–7.31 (m, 2H), 6.16 (s, 1H), 4.96 (s, 1H), 4.71 (s, 1H), 4.46 (s, 1H), 4.38 (s, 5H), 4.24 (s, 1H);  **$^{13}\text{C NMR}$**  (150 MHz,  $\text{CDCl}_3$ ):  $\delta$  196.1, 140.5, 137.7, 137.6, 124.3, 124.0, 123.5, 122.8, 122.3, 96.0, 75.8, 74.9, 73.2, 71.6, 70.5, 65.0; **HRMS (ESI)** calcd for  $\text{C}_{20}\text{H}_{16}\text{FeO}_2\text{SNa}$   $[\text{M}+\text{Na}]^+$  399.0112, found 399.0116.

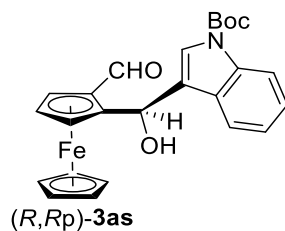

**Compound (R,Rp)-3as.** (Table 2, entry 22, 26.2 mg, 57% yield, 0.057 mmol, a red solid, eluent: hexane/ethyl acetate (5/1),  $R_f = 0.4$ ). The ee was measured by HPLC (Chiralpak IB N-5 column, hexane/2-propanol = 90/10, 0.8 mL/min, 230 nm,  $t_{\text{major}} = 16.4$  min,  $t_{\text{minor}} = 18.4$  min);  $[\alpha]_D^{25} -5.9 \times 10^2$  ( $c$  0.31,  $\text{CHCl}_3$ ) for 97% ee.  **$^1\text{H NMR}$**  (600 MHz,  $\text{CDCl}_3$ ):  $\delta$  9.98 (s, 1H), 8.17 (d,  $J = 7.9$  Hz, 1H), 7.70 (s, 1H), 7.52 (d,  $J = 7.9$  Hz, 1H), 7.31 (t,  $J = 7.8$  Hz, 1H), 7.21 (t,  $J = 7.5$  Hz, 1H), 6.10 (s, 1H), 4.72 (s, 1H), 4.55–4.45 (m, 3H), 4.40 (s, 5H), 1.67 (s, 9H);  **$^{13}\text{C NMR}$**  (150 MHz,  $\text{CDCl}_3$ ):  $\delta$  195.8, 149.7, 135.5, 129.0, 124.4, 123.7, 122.8, 122.6, 119.7, 115.3, 96.0, 83.7, 75.2, 75.0, 73.1, 71.6, 70.4, 63.5, 28.2; **HRMS (ESI)** calcd for  $\text{C}_{25}\text{H}_{25}\text{FeNO}_4\text{Na}$   $[\text{M}+\text{Na}]^+$  482.1025, found 482.1026.

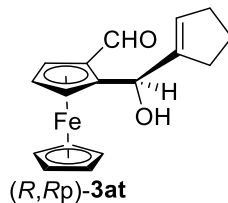

**Compound (R,Rp)-3at.** (Table 2, entry 23, 24.2 mg, 78% yield, 0.078 mmol, a red solid, eluent: hexane/ethyl acetate (5/1),  $R_f = 0.4$ ). The ee was measured by HPLC (Chiralpak IC column, hexane/2-propanol = 80/20, 1.0 mL/min, 230 nm,  $t_{\text{major}} = 10.9$  min,  $t_{\text{minor}} = 9.6$  min);  $[\alpha]_{\text{D}}^{25} -4.6 \times 10^2$  ( $c$  0.15,  $\text{CHCl}_3$ ) for 94% ee.  **$^1\text{H NMR}$**  (600 MHz,  $\text{CDCl}_3$ ):  $\delta$  9.96 (s, 1H), 5.67 (s, 1H), 5.45 (s, 1H), 4.72 (s, 1H), 4.65 (s, 1H), 4.55 (s, 1H), 4.35 (s, 5H), 3.39 (s, 1H), 2.44–2.32 (m, 4H), 1.92–1.87 (m, 2H);  **$^{13}\text{C NMR}$**  (150 MHz,  $\text{CDCl}_3$ ):  $\delta$  194.7, 145.3, 127.1, 95.4, 73.0, 71.8, 71.4, 71.0, 70.3, 66.8, 32.2, 31.9, 23.2; **HRMS (ESI)** calcd for  $\text{C}_{17}\text{H}_{18}\text{FeO}_2\text{Na}$   $[\text{M}+\text{Na}]^+$  333.0548, found 333.0552.

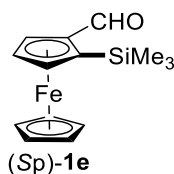

**Compound (Sp)-1e [32648-55-8].** (Scheme 2, 12.3 mg, 43% yield, 0.043 mmol, a red solid, eluent: hexane/ethyl acetate (20/1),  $R_f = 0.6$ ). The ee was measured by HPLC (Chiralpak IC column, hexane/2-propanol = 95/5, 1.0 mL/min, 230 nm,  $t_{\text{major}} = 8.7$  min,  $t_{\text{minor}} = 8.0$  min);  $[\alpha]_{\text{D}}^{25} -1.5 \times 10^2$  ( $c$  0.25, EtOH) for >99.5% ee. Reported value<sup>8</sup> for 99.8% ee (**(Sp)-1e** is  $[\alpha]_{\text{D}}^{20} -2.0 \times 10^2$  ( $c$  0.24, EtOH).  **$^1\text{H NMR}$**  (600 MHz,  $\text{CDCl}_3$ ):  $\delta$  10.0 (s, 1H), 4.96 (s, 1H), 4.70 (s, 1H), 4.51 (s, 1H), 4.24 (s, 5H), 0.31 (s, 9H). The spectral data are in agreement with reported literature values.<sup>8</sup>

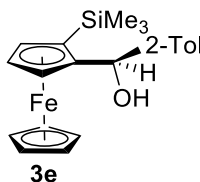

**Compound (R,Rp)-3e.** (Scheme 2, 17.8 mg, 47% yield, 0.047 mmol, a yellow solid, eluent: hexane/ethyl acetate (20/1),  $R_f = 0.4$ ). The ee was measured by HPLC (Chiralpak IC column, hexane/2-propanol = 95/5, 1.0 mL/min, 230 nm,  $t_{\text{major}} = 6.7$  min,  $t_{\text{minor}} = 5.2$  min);  $[\alpha]_{\text{D}}^{25} -17$  ( $c$  0.43,  $\text{CHCl}_3$ ) for 96% ee.  **$^1\text{H NMR}$**  (600 MHz,  $\text{CDCl}_3$ ):  $\delta$  7.16–7.13



(m, 3H), 7.09 (t,  $J = 7.3$  Hz, 1H), 5.64 (s, 1H), 4.47 (s, 1H), 4.43 (s, 1H), 4.32 (s, 5H), 4.26 (s, 1H), 2.39 (s, 3H), 2.26 (s, 1H), 0.08 (s, 9H);  $^{13}\text{C}$  NMR (150 MHz,  $\text{CDCl}_3$ ):  $\delta$  141.1, 136.1, 130.2, 127.6, 127.0, 125.7, 99.0, 75.2, 71.2, 70.7, 69.9, 69.0, 68.7, 19.1, 0.1. HRMS (MALDI-TOF)  $m/z$ :  $[\text{M}]^+$  Calcd for  $\text{C}_{21}\text{H}_{26}\text{FeSiO}^+$  378.1097; Found 378.1106.

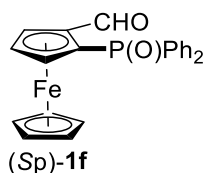

**Compound (Sp)-1f.** (Scheme 2, 18.6 mg, 45% yield, 0.045 mmol, an orange solid, eluent: dichloromethane/ethyl acetate (4/1),  $R_f = 0.2$ ). The ee of (Sp)-1f was determined by its derivative (Sp)-12;  $[\alpha]^{25}_{\text{D}} +3.5 \times 10^2$  ( $c$  0.21,  $\text{CHCl}_3$ ) for 97% ee. Reported value<sup>4</sup> for (Rp)-1f is  $[\alpha]^{25}_{\text{D}} -5.1 \times 10^2$  ( $c$  0.13,  $\text{CHCl}_3$ ).  $^1\text{H}$  NMR (600 MHz,  $\text{CDCl}_3$ ):  $\delta$  10.4 (s, 1H), 7.80 (dd,  $J = 11.9$  Hz, 7.4 Hz, 2H), 7.60–7.48 (m, 6H), 7.40 (td,  $J = 7.7$  Hz, 2.8 Hz, 2H), 5.23 (s, 1H), 4.76 (s, 1H), 4.40 (s, 5H), 4.24 (s, 1H);  $^{31}\text{P}$  NMR (243 MHz,  $\text{CDCl}_3$ ):  $\delta$  27.7. The spectral data are in agreement with reported literature values.<sup>[4]</sup>

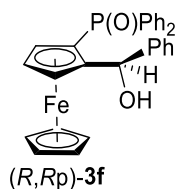

**Compound (R,Rp)-3f.** (Scheme 2, 23.1 mg, 47% yield, 0.047 mmol, a yellow solid, eluent: dichloromethane/ethyl acetate (5/1),  $R_f = 0.4$ ). The ee was measured by HPLC (Chiralpak IA column, hexane/2-propanol = 80/20, 1.0 mL/min, 230 nm,  $t_{\text{major}} = 31.8$  min,  $t_{\text{minor}} = 14.7$  min);  $[\alpha]^{25}_{\text{D}} -17$  ( $c$  0.43,  $\text{CHCl}_3$ ) for 94% ee.  $^1\text{H}$  NMR (600 MHz,  $\text{CDCl}_3$ ):  $\delta$  7.82 (dd,  $J = 12.2$  Hz, 7.6 Hz, 2H), 7.60–7.52 (m, 5H), 7.50 (t,  $J = 7.5$  Hz, 1H), 7.42–7.41 (m, 4H), 7.31 (t,  $J = 7.4$  Hz, 2H), 7.25 (t,  $J = 7.3$  Hz, 1H), 6.26 (s, 1H), 5.43 (s, 1H), 4.37 (s, 5H), 4.20 (s, 1H), 3.91 (s, 1H), 3.84 (s, 1H);  $^{13}\text{C}$  NMR (150 MHz,  $\text{CDCl}_3$ ):  $\delta$  142.1, 134.2, 133.5, 132.7, 132.0 (d,  $J_{\text{C-P}} = 3.3$  Hz), 131.8 (d,  $J_{\text{C-P}} = 2.7$  Hz), 131.7 (d,  $J_{\text{C-P}} = 9.9$  Hz), 131.5 (d,  $J_{\text{C-P}} = 10.1$  Hz), 128.5 (d,  $J_{\text{C-P}} = 12.1$  Hz), 128.3 (d,  $J_{\text{C-P}} = 12.1$  Hz), 127.9, 127.2, 127.0, 101.1 (d,  $J_{\text{C-P}} = 10.8$  Hz), 74.7 (d,  $J_{\text{C-P}} = 9.4$  Hz), 73.3 (d,  $J_{\text{C-P}} = 15.0$  Hz), 70.2, 70.0 (d,  $J_{\text{C-P}} = 20.5$  Hz), 69.1 (d,  $J_{\text{C-P}} = 11.1$  Hz), 68.8;  $^{31}\text{P}$  NMR (243 MHz,  $\text{CDCl}_3$ ):

$\delta$  33.2. HRMS (MALDI-TOF)  $m/z$ :  $[M]^+$  Calcd for  $C_{29}H_{25}FeO_2P^{*+}$  492.0936; Found 492.0932.

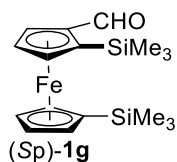

**Compound (Sp)-1g [934276-76-3].** (Scheme 2, 16.8 mg, 47% yield, 0.047 mmol, a red solid, eluent: hexane/ethyl acetate (20/1),  $R_f$  = 0.6). The ee was measured by HPLC (Chiralpak ID column, hexane/2-propanol = 98/2, 0.5 mL/min, 230 nm,  $t_{major}$  = 11.0 min,  $t_{minor}$  = 10.5 min);  $[\alpha]^{25}_D +1.6 \times 10^2$  ( $c$  0.15,  $CHCl_3$ ) for >99.5% ee. **<sup>1</sup>H NMR** (600 MHz,  $CDCl_3$ ):  $\delta$  10.0 (s, 1H), 4.93 (s, 1H), 4.67 (s, 1H), 4.49 (s, 2H), 4.41 (s, 1H), 4.24 (s, 1H), 4.10 (s, 1H), 0.32 (s, 9H), 0.22 (s, 9H). The spectral data are in agreement with reported literature values.<sup>5</sup>

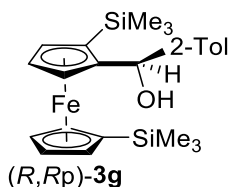

**Compound (R,Rp)-3g.** (Scheme 2, 21.6 mg, 48% yield, 0.048 mmol, a yellow solid, eluent: hexane/ethyl acetate (20/1),  $R_f$  = 0.4). The ee was measured by HPLC (Chiralpak ID column, hexane/2-propanol = 95/5, 1.0 mL/min, 230 nm,  $t_{major}$  = 5.5 min,  $t_{minor}$  = 4.4 min);  $[\alpha]^{25}_D -5.1$  ( $c$  0.079,  $CHCl_3$ ) for >99.5% ee. **<sup>1</sup>H NMR** (600 MHz,  $CDCl_3$ ):  $\delta$  7.17–7.13 (m, 3H), 7.10 (t,  $J$  = 7.3 Hz, 1H), 5.59 (s, 1H), 4.53–4.26 (m, 7H), 2.38 (s, 3H), 2.22 (s, 1H), 0.19 (s, 9H), 0.06 (s, 9H); **<sup>13</sup>C NMR** (150 MHz,  $CDCl_3$ ):  $\delta$  141.1, 136.1, 130.2, 127.6, 127.0, 125.7, 98.6, 75.1, 73.7, 73.2, 71.8, 71.0, 70.7, 70.3, 68.7, 19.1, 0.1, -0.2. HRMS (MALDI-TOF)  $m/z$ :  $[M]^+$  Calcd for  $C_{24}H_{34}FeOSi_2^{*+}$  450.1492; Found 450.1496.

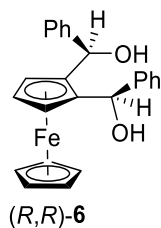

**Compound (R,R)-6** [417710-62-4]. (Scheme 3, 185.2 mg, 93% yield, 0.46 mmol, a brown solid, eluent: hexane/ethyl acetate (20/1),  $R_f$  = 0.5);  $^1\text{H NMR}$  (600 MHz,  $\text{CDCl}_3$ ):  $\delta$  7.39 (d,  $J$  = 7.6 Hz, 2H), 7.35–7.28 (m, 6H), 7.27–7.25 (m, 2H), 5.64–5.63 (m, 1H), 5.43 (s, 1H), 4.29 (s, 5H), 4.17 (t,  $J$  = 2.0 Hz, 1H), 4.07 (t,  $J$  = 2.6 Hz, 1H), 3.80 (t,  $J$  = 2.0 Hz, 1H), 3.26 (s, 1H), 3.21 (s, 1H); **HRMS (ESI)** calcd for  $\text{C}_{24}\text{H}_{22}\text{FeO}_2\text{Na}$   $[\text{M}+\text{Na}]^+$  421.0861, found 421.0866. The experimental data are in agreement with the literature report.<sup>9</sup>

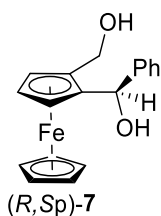

**Compound (R,Sp)-7.** (Scheme 3, 120.1 mg, 98% yield, 0.37 mmol, an orange solid, eluent: hexane/ethyl acetate (5/1),  $R_f$  = 0.5);  $^1\text{H NMR}$  (600 MHz,  $\text{CDCl}_3$ ):  $\delta$  7.41 (d,  $J$  = 7.1 Hz, 2H), 7.34 (t,  $J$  = 7.5 Hz, 2H), 7.28–7.27 (m, 1H), 5.61 (s, 1H), 4.41 (d,  $J$  = 12.2 Hz, 1H), 4.35 (d,  $J$  = 12.3 Hz, 1H), 4.30 (s, 5+1H), 4.22 (s, 1H), 4.16 (s, 1H), 2.66 (brs., 1H), 1.63 (brs., 1H);  $^{13}\text{C NMR}$  (150 MHz,  $\text{CDCl}_3$ ):  $\delta$  143.3, 128.3, 127.6, 126.3, 93.0, 85.9, 70.4, 69.5, 68.9, 67.2, 66.5, 59.1; **HRMS (ESI)** calcd for  $\text{C}_{18}\text{H}_{18}\text{FeO}_2$   $[\text{M}+\text{Na}]^+$  345.0548, found 345.0554.

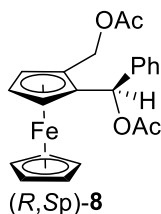

**Compound (R,Sp)-8.** (Scheme 3, 117.2 mg, 96% yield, 0.29 mmol, an orange solid, eluent: hexane/ethyl acetate (5/1),  $R_f$  = 0.5);  $^1\text{H NMR}$  (600 MHz,  $\text{CDCl}_3$ ):  $\delta$  7.33–7.27 (m, 5H), 6.88 (s, 1H), 4.99 (d,  $J$  = 12.4 Hz, 1H), 4.82 (d,  $J$  = 12.1 Hz, 1H), 4.41 (s, 1H), 4.30 (s, 1H), 4.24 (s, 1H), 4.21 (s, 5H), 2.22 (s, 3H), 1.76 (s, 3H);  $^{13}\text{C NMR}$  (150 MHz,  $\text{CDCl}_3$ ):

$\delta$  170.5, 169.7, 140.5, 128.2, 128.0, 127.4, 88.7, 79.1, 72.2, 70.5, 69.4, 67.5, 67.4, 61.2, 21.2, 20.5; **HRMS (ESI)** calcd for  $C_{22}H_{22}FeO_4$   $[M+Na]^+$  429.0760, found 429.0762.

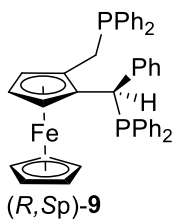

**Compound (R,Sp)-9.** (Scheme 3, 125.1 mg, 76% yield, 0.19 mmol, a yellow solid, eluent: hexane/ethyl acetate (5/1),  $R_f = 0.6$ );  **$^1H$  NMR** (600 MHz,  $CDCl_3$ ):  $\delta$  7.70 (s, 2H), 7.95–6.46 (m, 21H), 6.71 (s, 2H), 4.88 (s, 1H), 4.42 (s, 1H), 4.03 (s, 1H), 3.98 (s, 5H), 3.88 (s, 1H), 3.03 (d,  $J = 15.2$  Hz, 1H), 2.79 (d,  $J = 15.4$  Hz, 1H);  **$^{13}C$  NMR** (150 MHz,  $CDCl_3$ ):  $\delta$  141.6, 139.5 (d,  $J_{C-P} = 15.1$  Hz), 139.2 (d,  $J_{C-P} = 15.7$  Hz), 135.5 (d,  $J_{C-P} = 22.2$  Hz), 133.3 (d,  $J_{C-P} = 20.0$  Hz), 133.2 (d,  $J_{C-P} = 19.0$  Hz), 132.1 (d,  $J_{C-P} = 18.0$  Hz), 131.2, 130.3, 128.9 (d,  $J_{C-P} = 3.7$  Hz), 128.8 (d,  $J_{C-P} = 21.9$  Hz), 128.5 (d,  $J_{C-P} = 5.1$  Hz), 128.4 (d,  $J_{C-P} = 8.9$  Hz), 128.3 (d,  $J_{C-P} = 11.7$  Hz), 128.1 (d,  $J_{C-P} = 24.0$  Hz), 127.6 (d,  $J_{C-P} = 8.0$  Hz), 127.5, 125.7, 124.4, 113.0, 89.9 (dd,  $J_{C-P} = 20.6, 3.8$  Hz), 83.4 (dd,  $J_{C-P} = 14.8, 6.9$  Hz), 69.9, 69.2 (d,  $J_{C-P} = 9.8$  Hz), 65.5, 57.3, 45.6 (d,  $J_{C-P} = 21.9$  Hz), 28.0 (d,  $J_{C-P} = 14.8$  Hz);  **$^{31}P$  NMR** (243 MHz,  $CDCl_3$ ):  $\delta$  1.9, -19.1; **HRMS (ESI)** calcd for  $C_{42}H_{37}FeP_2$   $[M+H]^+$  659.1715, found 659.1711.

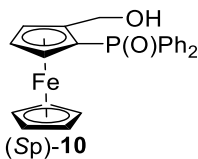

**Compound (Sp)-10 [494205-49-1].** (Scheme 3, 79.1 mg, 98% yield, 0.19 mmol, a yellow solid, eluent: dichloromethane/ethyl acetate (4/1),  $R_f = 0.6$ ).  **$^1H$  NMR** (600 MHz,  $CDCl_3$ ):  $\delta$  7.83–7.80 (m, 2H), 7.60 (td,  $J = 7.4$  Hz, 1.5 Hz, 1H), 7.56–7.52 (m, 4H), 7.49–7.46 (m, 1H), 7.41–7.37 (m, 2H), 5.47 (dd,  $J = 10.5$  Hz, 2.8 Hz, 1H), 4.54 (s, 1H), 4.34–4.32 (m, 2H), 4.26 (s, 5H), 4.17 (dd,  $J = 13.1$  Hz, 10.5 Hz, 1H), 3.93 (s, 1H).  **$^{31}P$  NMR** (243 MHz,  $CDCl_3$ ):  $\delta$  33.4. The spectral data are in agreement with reported literature values.<sup>10</sup>

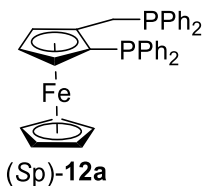

**Compound (Sp)-12a [395080-13-4].** (Scheme 3, 67.4 mg, 79% yield, 0.12 mmol, a red solid, eluent: hexane/ethyl acetate (20/1),  $R_f = 0.6$ ). The ee was measured by HPLC (Chiralpak IA column, hexane/2-propanol = 95/5, 1.0 mL/min, 230 nm,  $t_{\text{major}} = 4.8$  min (major),  $t_{\text{minor}} = 4.4$  min);  $[\alpha]^{25}_{\text{D}} -1.5 \times 10^2$  ( $c$  0.12,  $\text{CHCl}_3$ ) for 97% ee. Reported value<sup>11</sup> for (Rp)-12a is  $[\alpha]^{25}_{\text{D}} +1.8 \times 10^2$  ( $c$  0.44,  $\text{CHCl}_3$ ). <sup>1</sup>H NMR (600 MHz,  $\text{CDCl}_3$ ):  $\delta$  7.61–7.58 (m, 2H), 7.45–7.42 (m, 2H), 7.40–7.39 (m, 3H), 7.35–7.34 (m, 3H), 7.32 (td,  $J = 6.2$  Hz, 2.2 Hz, 2H), 7.27–7.25 (m, 6H), 7.20 (td,  $J = 7.0$  Hz, 2.8 Hz, 2H), 4.15 (s, 1H), 4.08 (s, 1H), 3.97 (s, 5H), 3.76 (s, 1H), 3.36 (s, 2H); <sup>31</sup>P NMR (243 MHz,  $\text{CDCl}_3$ ):  $\delta$  -15.0, -23.5. The spectral data are in agreement with reported literature values.<sup>11</sup>

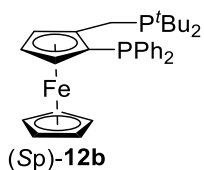

**Compound (Sp)-12b [950982-86-2].** (Scheme 3, 50.2 mg, 63% yield, 0.095 mmol, a yellow solid, eluent: hexane/ethyl acetate (20/1),  $R_f = 0.4$ );  $[\alpha]^{25}_{\text{D}} -1.6 \times 10^2$  ( $c$  0.12,  $\text{CHCl}_3$ ). Reported value<sup>11</sup> for (Sp)-12b is  $[\alpha]^{20}_{\text{D}} -1.6 \times 10^2$  ( $c$  1.0,  $\text{CHCl}_3$ ). <sup>1</sup>H NMR (600 MHz,  $\text{CDCl}_3$ ):  $\delta$  7.61–7.58 (m, 2H), 7.38–7.37 (m, 3H), 7.25–7.23 (m, 5H), 4.76 (s, 1H), 4.21 (s, 1H), 3.99 (s, 5H), 3.77 (s, 1H), 2.81 (d,  $J = 16.4$  Hz, 1H), 2.62 (dd,  $J = 16.4$  Hz, 5.0 Hz, 1H), 1.19 (d,  $J = 11.0$  Hz, 9H), 0.89 (d,  $J = 10.9$  Hz, 9H); <sup>31</sup>P NMR (243 MHz,  $\text{CDCl}_3$ ):  $\delta$  26.9, -23.6. The spectral data are in agreement with reported literature values.<sup>11</sup>

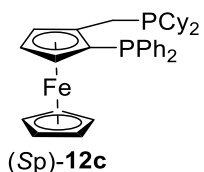

**Compound (Sp)-12c [395080-11-2].** (Scheme 3, 58.3 mg, 67% yield, 0.10 mmol, a yellow solid, eluent: hexane/ethyl acetate (20/1),  $R_f = 0.4$ );  $[\alpha]^{25}_{\text{D}} -1.5 \times 10^2$  ( $c$  0.12,  $\text{CHCl}_3$ ). Reported value<sup>11</sup> for (Sp)-12c is  $[\alpha]^{20}_{\text{D}} -1.6 \times 10^2$  ( $c$  1.0,  $\text{CHCl}_3$ ). <sup>1</sup>H NMR (600 MHz,

CDCl<sub>3</sub>):  $\delta$  7.59–7.56 (m, 2H), 7.38–7.37 (m, 3H), 7.23–7.18 (m, 5H), 4.55 (s, 1H), 4.22 (s, 1H), 3.97 (s, 5H), 3.74 (s, 1H), 2.71 (d,  $J = 15.4$  Hz, 1H), 2.63 (d,  $J = 15.6$  Hz, 1H), 1.81–1.79 (m, 4H), 1.71 (s, 1H), 1.63–1.56 (m, 3H), 1.51–1.47 (m, 2H), 1.35–1.22 (m, 7H), 1.07–1.02 (m, 5H); <sup>31</sup>P NMR (243 MHz, CDCl<sub>3</sub>):  $\delta$  -2.1, -23.6. The spectral data are in agreement with reported literature values.<sup>11</sup>

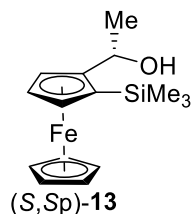

**Compound (S,Sp)-13.** (Scheme 3, 53.8 mg, 89% yield, 0.18 mmol, a yellow solid, eluent: hexane/ethyl acetate (20/1),  $R_f = 0.4$ );  $[\alpha]^{25}_D +38$  ( $c$  0.080, CHCl<sub>3</sub>). Reported value<sup>12</sup> for (*R,Rp*)-**13** is  $[\alpha]^{20}_D -45$  ( $c$  0.83, CHCl<sub>3</sub>). <sup>1</sup>H NMR (600 MHz, CDCl<sub>3</sub>):  $\delta$  4.54–4.51 (m, 2H), 4.38 (s, 1H), 4.27 (s, 5H), 4.21 (s, 1H), 1.96 (s, 1H), 1.34 (d,  $J = 6.1$  Hz, 3H), 0.23 (s, 9H). The spectral data are in agreement with reported literature values.<sup>12</sup>

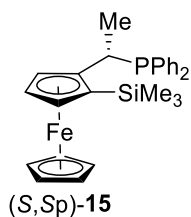

**Compound (S,Sp)-15.** (Scheme 3, 28.2 mg, 60% yield, 0.060 mmol, an orange solid, eluent: hexane/ethyl acetate (20/1),  $R_f = 0.4$ );  $[\alpha]^{25}_D +1.3 \times 10^2$  ( $c$  0.093 CHCl<sub>3</sub>). <sup>1</sup>H NMR (600 MHz, CDCl<sub>3</sub>):  $\delta$  7.65–7.62 (m, 2H), 7.51 (t,  $J = 7.2$  Hz, 2H), 7.40–7.38 (m, 5H), 7.33 (dd,  $J = 7.5$  Hz, 7.2 Hz, 1H), 4.24 (s, 1H), 4.21 (s, 1H), 4.12 (s, 5H), 4.07 (s, 1H), 3.42 (qd,  $J = 7.8$  Hz, 3.1 Hz, 1H), 1.19 (dd,  $J = 7.7$  Hz, 7.6 Hz, 3H), 0.38 (s, 9H); <sup>31</sup>P NMR (243 MHz, CDCl<sub>3</sub>):  $\delta$  0.2. The spectral data are in agreement with reported literature values.<sup>13</sup>

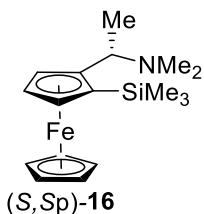

**Compound (S,Sp)-16 [62960-90-1].** (Scheme 3, 59.2 mg, 90% yield, 0.18 mmol, an orange oil, eluent: hexane/ethyl acetate/triethylamine (20/1/1%),  $R_f = 0.4$ );  $[\alpha]^{25}_D -67$  ( $c$  0.042,  $\text{CHCl}_3$ ). Reported value<sup>12</sup> for (R,Rp)-16 is  $[\alpha]^{20}_D +46$  ( $c$  1.32,  $\text{CHCl}_3$ ). **<sup>1</sup>H NMR** (600 MHz,  $\text{CDCl}_3$ ):  $\delta$  4.33 (s, 1H), 4.26 (t,  $J = 2.5$  Hz, 1H), 4.12 (s, 5H), 4.02 (s, 1H), 3.33 (q,  $J = 6.9$  Hz, 1H), 2.36 (s, 6H), 1.18 (d,  $J = 6.9$  Hz, 3H), 0.30 (s, 9H). The spectral data are in agreement with reported literature values.<sup>12</sup>

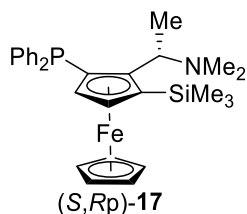

**Compound (S,Rp)-17.** (Scheme 3, 65.4 mg, 85% yield, 0.13 mmol, a red solid, eluent: hexane/ethyl acetate/triethylamine (10/1/1%),  $R_f = 0.4$ );  $[\alpha]^{25}_D +1.6 \times 10^2$  ( $c$  0.12,  $\text{CHCl}_3$ ). **<sup>1</sup>H NMR** (600 MHz,  $\text{CDCl}_3$ ):  $\delta$  7.59–7.56 (m, 2H), 7.39–7.37 (m, 3H), 7.24–7.22 (m, 5H), 4.20 (d,  $J = 2.4$  Hz, 1H), 3.96 (s, 5H), 3.93 (d,  $J = 2.4$  Hz, 1H), 3.17 (qd,  $J = 7.1$  Hz, 3.1 Hz, 1H), 1.82 (s, 6H), 1.63 (d,  $J = 7.0$  Hz, 3H), 0.29 (s, 9H); **<sup>13</sup>C NMR** (150 MHz,  $\text{CDCl}_3$ ):  $\delta$  139.8 (d,  $J_{C-P} = 9.1$  Hz), 138.5 (d,  $J_{C-P} = 10.2$  Hz), 135.3 (d,  $J_{C-P} = 21.7$  Hz), 132.7 (d,  $J_{C-P} = 18.6$  Hz), 128.9, 128.0 (d,  $J_{C-P} = 7.7$  Hz), 127.7 (d,  $J_{C-P} = 6.4$  Hz), 127.7, 107.4 (d,  $J_{C-P} = 20.2$  Hz), 78.1, 75.4, 73.5 (d,  $J_{C-P} = 2.7$  Hz), 72.4 (d,  $J_{C-P} = 4.4$  Hz), 69.8, 59.5 (d,  $J_{C-P} = 10.1$  Hz), 43.6, 22.6, 1.6; **<sup>31</sup>P NMR** (243 MHz,  $\text{CDCl}_3$ ):  $\delta$  -23.8; HRMS (MALDI-TOF)  $m/z$ :  $[M]^+$  Calcd for  $\text{C}_{29}\text{H}_{36}\text{FeNPSi}^+$  513.1699; Found 513.1704.

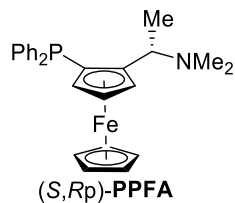

**Compound (S,Rp)-PPFA [55650-58-3].** (Scheme 3, 38.4 mg, 87% yield, 0.087 mmol, a red solid, eluent: hexane/ethyl acetate (20/1),  $R_f = 0.4$ );  $[\alpha]^{25}_D +3.5 \times 10^2$  ( $c$  0.12,  $\text{CHCl}_3$ ). Reported value<sup>14</sup> for (R,Sp)-PPFA is  $[\alpha]^{25}_D -3.5 \times 10^2$  ( $c$  0.25,  $\text{CHCl}_3$ ). **<sup>1</sup>H NMR** (600 MHz,  $\text{CDCl}_3$ ):  $\delta$  7.61–7.58 (m, 2H), 7.36–7.35 (m, 3H), 7.22–7.15 (m, 5H), 4.37 (s, 1H), 4.25 (s, 1H), 4.16 (qd,  $J = 6.6$  Hz, 2.7 Hz, 1H), 3.94 (s, 5H), 3.86 (s, 1H), 1.78 (s, 6H), 1.26 (d,  $J = 6.7$  Hz, 3H); **<sup>31</sup>P NMR** (243 MHz,  $\text{CDCl}_3$ ):  $\delta$  -22.8. The spectral data are in agreement with reported literature values.<sup>14</sup>

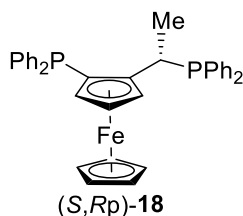

**Compound (S,Rp)-18 [155941-31-4].** (Scheme 3, 18.3 mg, 0.031 mmol, 63% yield, a yellow solid, eluent: hexane/ethyl acetate (20/1),  $R_f = 0.4$ );  $[\alpha]^{25}_D +3.2 \times 10^2$  ( $c$  0.12,  $\text{CHCl}_3$ ). Reported value<sup>15</sup> for (S,Rp)-18 is  $[\alpha]^{22}_D +3.6 \times 10^2$  ( $c$  1.0,  $\text{CHCl}_3$ ). **<sup>1</sup>H NMR** (600 MHz,  $\text{CDCl}_3$ ):  $\delta$  7.68–7.65 (m, 2H), 7.40–7.38 (m, 3H), 7.34–7.30 (m, 3H), 7.29–7.26 (m, 4H), 7.25–7.22 (m, 2H), 7.22–7.17 (m, 6H), 4.24 (t,  $J = 2.6$  Hz, 1H), 4.05 (s, 1H), 4.01 (s, 1H), 3.86 (s, 5H), 3.77 (qd,  $J = 7.0$  Hz, 3.7 Hz, 1H), 1.46 (dd,  $J = 7.3$  Hz, 7.3 Hz, 3H); **<sup>31</sup>P NMR** (243 MHz,  $\text{CDCl}_3$ ):  $\delta$  6.34 (d,  $J = 20.5$  Hz), -25.5 (d,  $J = 20.5$  Hz). The spectral data are in agreement with reported literature values.<sup>15</sup>

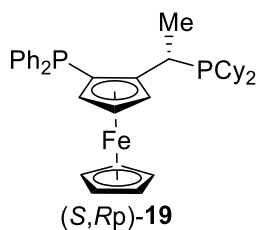

**Compound (S,Rp)-19 [162291-02-3].** (Scheme 3, 22.6 mg, 75% yield, 0.038 mmol, a red solid, eluent: hexane/ethyl acetate (20/1),  $R_f = 0.4$ );  $[\alpha]^{25}_D +2.9 \times 10^2$  ( $c$  0.12,  $\text{CHCl}_3$ ).



Reported value<sup>15</sup> for (*R,S*)-**19** is  $[\alpha]^{25}_{\text{D}} -3.5 \times 10^2$  (*c* 0.60, CHCl<sub>3</sub>). **<sup>1</sup>H NMR** (600 MHz, CDCl<sub>3</sub>):  $\delta$  7.70–7.67 (m, 2H), 7.38 (t, *J* = 7.0 Hz, 2H), 7.08–7.05 (m, 5H), 6.99–6.98 (m, 1H), 4.21 (s, 1H), 4.12 (s, 1H), 4.08 (s, 1H), 3.78 (s, 5H), 3.51 (qd, *J* = 7.0 Hz, 3.1 Hz, 1H), 1.83 (d, *J* = 12.9 Hz, 1H), 1.76 (d, *J* = 10.9 Hz, 2H), 1.70–1.67 (m, 3H), 1.65–1.63 (m, 3H), 1.61–1.58 (m, 5H), 1.41–1.35 (m, 1H), 1.26–1.11 (m, 10H); **<sup>31</sup>P NMR** (243 MHz, CDCl<sub>3</sub>):  $\delta$  14.8 (d, *J* = 36.7 Hz), –25.8 (d, *J* = 36.5 Hz). The spectral data are in agreement with reported literature values.<sup>15</sup>

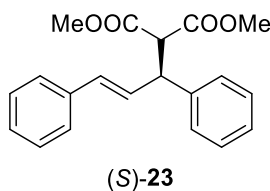

**Compound (S)-23[96482-64-3]**. (Scheme 3, 28.2 mg, 87% yield, 0.087 mmol, a colorless solid, eluent: hexane/ethyl acetate (10/1), *R<sub>f</sub>* = 0.4). The ee was measured by HPLC (Chiralpak IA column, hexane/2-propanol = 90/10, 1.0 mL/min, 230 nm, *t*<sub>major</sub> = 10.3 min (major), *t*<sub>minor</sub> = 8.4 min);  $[\alpha]^{25}_{\text{D}} -14$  (*c* 0.27, CHCl<sub>3</sub>) for 90% ee. Reported value<sup>6</sup> for 93% ee (*R*)-**23** is  $[\alpha]^{22}_{\text{D}} +4.7$  (*c* 1.8, CH<sub>2</sub>Cl<sub>2</sub>). **<sup>1</sup>H NMR** (600 MHz, CDCl<sub>3</sub>):  $\delta$  7.35–7.32 (m, 6H), 7.29 (t, *J* = 7.3 Hz, 2H), 7.26–7.25 (m, 1H), 7.22 (t, *J* = 7.4 Hz, 1H), 6.52 (d, *J* = 15.7 Hz, 1H), 6.38 (dd, *J* = 15.8 Hz, 8.6 Hz, 1H), 4.31 (dd, *J* = 9.9 Hz, 9.7 Hz, 1H), 4.00 (d, *J* = 10.9 Hz, 1H), 3.72 (s, 3H), 3.54 (s, 3H); **<sup>13</sup>C NMR** (150 MHz, CDCl<sub>3</sub>):  $\delta$  168.2, 167.8, 140.3, 136.9, 131.9, 129.2, 128.8, 128.5, 127.9, 127.6, 127.2, 126.4, 57.7, 52.6, 52.4, 49.2. The spectral data are in agreement with reported literature values.<sup>6</sup>

## 9. Single crystal x-ray diffraction data for compound 3ah(CCDC 2403094)

Suitable crystals of compound **3ah** were obtained by slowly evaporating a mixture of dichloromethane and hexane solution at ambient temperature. red crystal of **3ah** was mounted on a glass fiber at a random orientation. The data were collected by Rigaku Oxford Diffraction Supernova Dual Source, Cu at Zero equipped with an AtlasS2 CCD using  $\text{CuK}\alpha$  radiation (1.54178 Å) by using a  $\omega$  scan mode. The structures were solved by direct methods using Olex2 software, and the nonhydrogen atoms were located from the trial structure and then refined anisotropically with XL using a full-matrix least squares procedure based on  $F^2$ . The weighted R factor, wR and goodness-of-fit S values were obtained based on  $F^2$ . The hydrogen atom positions were fixed geometrically at the calculated distances and allowed to ride on the parent atoms.

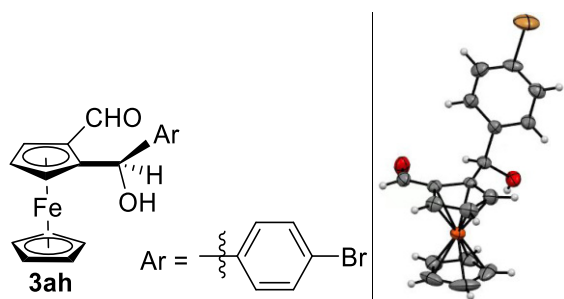

Figure S1. ORTEP illustration of compound **3ha** with thermal ellipsoids drawn at 50% probability level.

**Table S5** Crystal data and structure refinement for 3ah.

|                     |                                            |
|---------------------|--------------------------------------------|
| Identification code | Febr                                       |
| Empirical formula   | $\text{C}_{18}\text{H}_{15}\text{BrFeO}_2$ |
| Formula weight      | 399.06                                     |
| Temperature/K       | 219.99(10)                                 |
| Crystal system      | triclinic                                  |
| Space group         | P1                                         |
| $a/\text{Å}$        | 7.6130(5)                                  |
| $b/\text{Å}$        | 8.5829(4)                                  |
| $c/\text{Å}$        | 12.8193(7)                                 |
| $\alpha/^\circ$     | 80.360(4)                                  |
| $\beta/^\circ$      | 73.628(5)                                  |
| $\gamma/^\circ$     | 82.082(5)                                  |

|                                             |                                                               |
|---------------------------------------------|---------------------------------------------------------------|
| Volume/Å <sup>3</sup>                       | 788.68(8)                                                     |
| Z                                           | 2                                                             |
| ρ <sub>calc</sub> /cm <sup>3</sup>          | 1.680                                                         |
| μ/mm <sup>-1</sup>                          | 10.660                                                        |
| F(000)                                      | 400.0                                                         |
| Crystal size/mm <sup>3</sup>                | 0.16 × 0.12 × 0.11                                            |
| Radiation                                   | Cu Kα (λ = 1.54184)                                           |
| 2θ range for data collection/°              | 7.254 to 148.02                                               |
| Index ranges                                | -9 ≤ h ≤ 9, -10 ≤ k ≤ 10, -15 ≤ l ≤ 15                        |
| Reflections collected                       | 12506                                                         |
| Independent reflections                     | 5856 [R <sub>int</sub> = 0.0551, R <sub>sigma</sub> = 0.0644] |
| Data/restraints/parameters                  | 5856/3/399                                                    |
| Goodness-of-fit on F <sup>2</sup>           | 1.080                                                         |
| Final R indexes [I ≥ 2σ (I)]                | R <sub>1</sub> = 0.0445, wR <sub>2</sub> = 0.1133             |
| Final R indexes [all data]                  | R <sub>1</sub> = 0.0507, wR <sub>2</sub> = 0.1195             |
| Largest diff. peak/hole / e Å <sup>-3</sup> | 0.40/-0.52                                                    |
| Flack/Hooft parameter                       | -0.006(5)/-0.004(4)                                           |

## 10. References

1. A. van der Ent and A. L. Onderdelinden, *Inorg. Synth.*, 1990, **28**, 90–92.
2. T. Nishimura, H. Kumamoto, M. Nagaosa and T. Hayashi, *Chem. Commun.*, 2009, 5713–5715.
3. A. Sadeer, T. Kojima, J. S. Ng, K. Gan, R. J. Chew, Y. Li and S. A. Pullarkat, *Tetrahedron*, 2020, **76**, 131259.
4. S.-i. Fukuzawa, I. Oura, K. Shimizu, M. Kato and K.-i. Ogata, *Eur. J. Org. Chem.*, 2009, **2009**, 716–720.
5. H. Li, H.-S. Cheng, A.-H. Seow and T.-P. Loh, *Tetrahedron. Lett.*, 2007, **48**, 2209–2211.
6. C.-X. Liu, F. Zhao, Q. Gu and S.-L. You, *ACS Cent. Sci.*, 2023, **9**, 2036–2043.
7. Y. Yang, N.-N. Hang, H.-Y. Liu, S. Chen and J. Ming, *ACS Catal.*, 2023, **13**, 12464–12471.
8. O. Riant, O. Samuel, T. Flessner, S. Taudien and H. B. Kagan, *J. Org. Chem.*, 1997, **62**, 6733–6745.
9. S.-i. Fukuzawa, K. Fujimoto, Y. Komuro and H. Matsuzawa, *Org. Lett.*, 2002, **4**, 707–709.
10. P. Štěpnička and I. Císařová, *New J. Chem.*, 2002, **26**, 1389–1396.
11. G. Argouarch, O. Samuel and H. B. Kagan, *Eur. J. Org. Chem.*, 2000, **2000**, 2885–2891.
12. V. Bariak, A. Malastová, A. Almásson and R. Šebesta, *Chem. Eur. J.*, 2015, **21**, 13445–13453.
13. M. Murakami, R. Minamida, K. Itami, M. Sawamura and Y. Ito, *Chem. Commun.*, 2000, 2293–2294.
14. H. Nie, L. Yao, B. Li, S. Zhang and W. Chen, *Organometallics*, 2014, **33**, 2109–2114.
15. A. Togni, C. Breutel, A. Schnyder, F. Spindler, H. Landert and A. Tijani, *J. Am. Chem. Soc.*, 1994, **116**, 4062–4066.

## 11. Chiral HPLC charts and NMR spectra

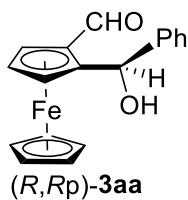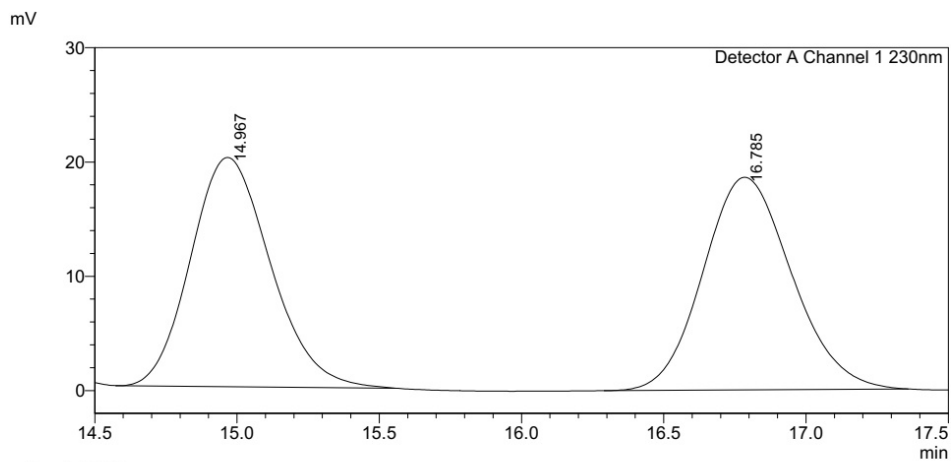

### <Peak Table>

Detector A Channel 1 230nm

| Peak# | Ret. Time | Area   | Height | Area%   |
|-------|-----------|--------|--------|---------|
| 1     | 14.967    | 391856 | 20070  | 49.277  |
| 2     | 16.785    | 403357 | 18611  | 50.723  |
| Total |           | 795213 | 38682  | 100.000 |

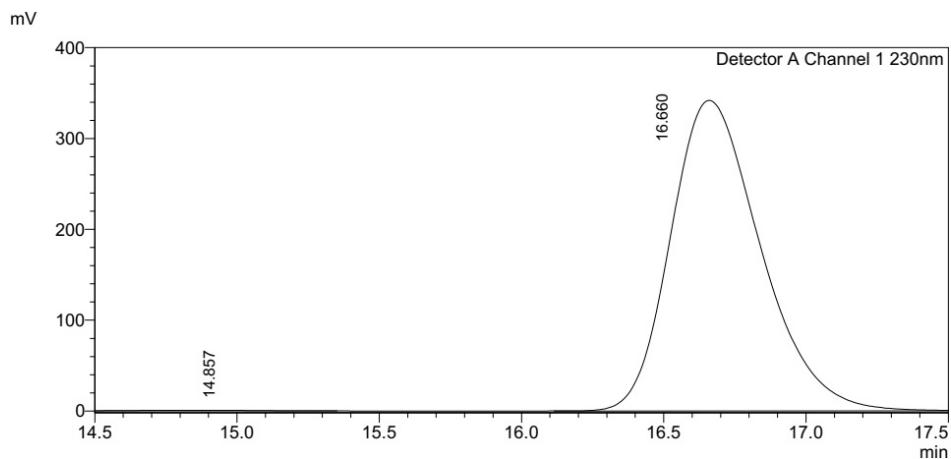

### <Peak Table>

Detector A Channel 1 230nm

| Peak# | Ret. Time | Area    | Height | Area%   |
|-------|-----------|---------|--------|---------|
| 1     | 14.857    | 20801   | 733    | 0.276   |
| 2     | 16.660    | 7525188 | 341934 | 99.724  |
| Total |           | 7545990 | 342666 | 100.000 |

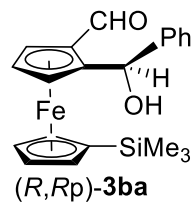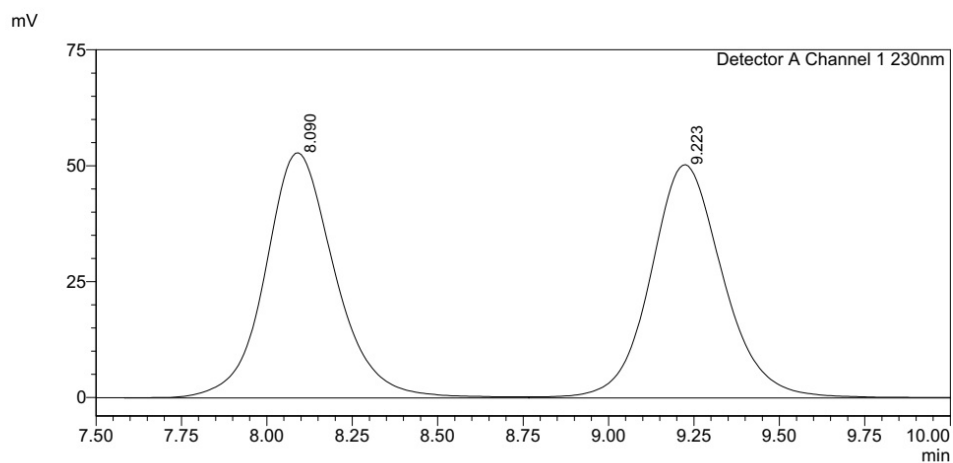

<Peak Table>

Detector A Channel 1 230nm

| Peak# | Ret. Time | Area    | Height | Area%   |
|-------|-----------|---------|--------|---------|
| 1     | 8.090     | 750972  | 52881  | 50.200  |
| 2     | 9.223     | 744990  | 50296  | 49.800  |
| Total |           | 1495962 | 103177 | 100.000 |

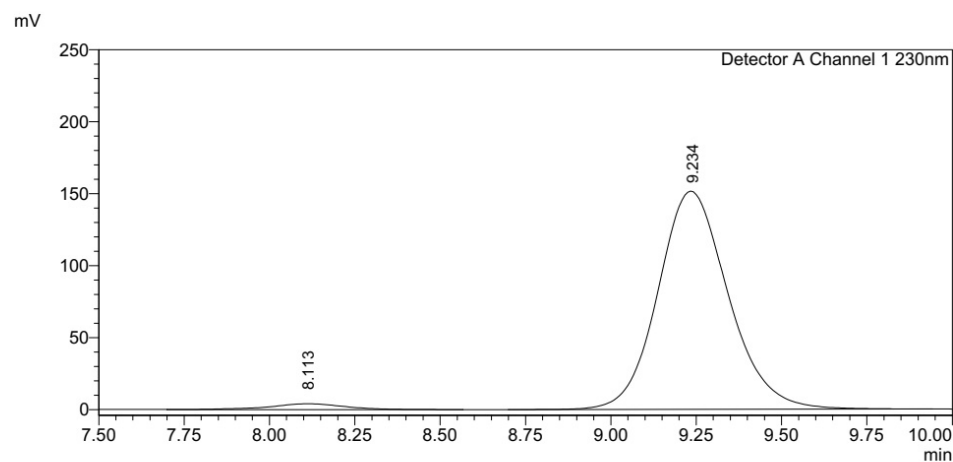

<Peak Table>

Detector A Channel 1 230nm

| Peak# | Ret. Time | Area    | Height | Area%   |
|-------|-----------|---------|--------|---------|
| 1     | 8.113     | 67035   | 4148   | 2.989   |
| 2     | 9.234     | 2176047 | 151591 | 97.011  |
| Total |           | 2243082 | 155739 | 100.000 |

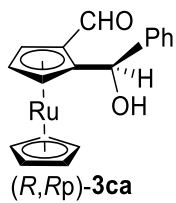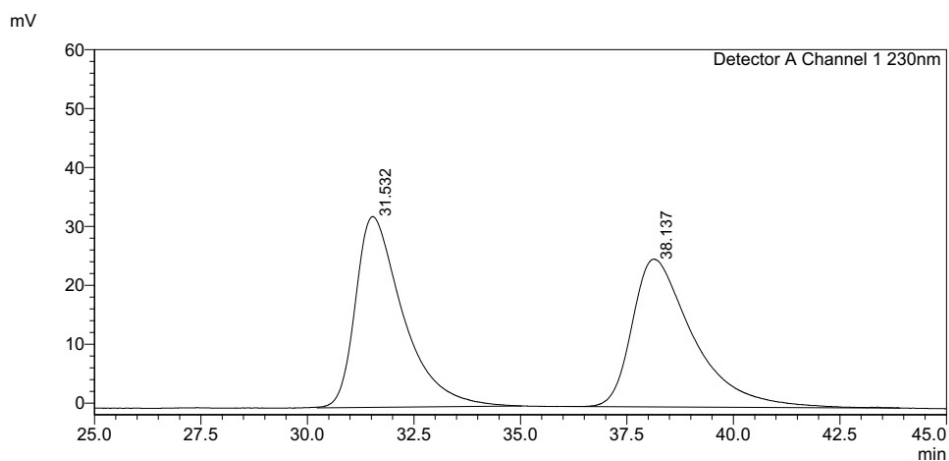

<Peak Table>

Detector A Channel 1 230nm

| Peak# | Ret. Time | Area    | Height | Area%   |
|-------|-----------|---------|--------|---------|
| 1     | 31.532    | 2518845 | 32405  | 50.122  |
| 2     | 38.137    | 2506605 | 25087  | 49.878  |
| Total |           | 5025450 | 57491  | 100.000 |

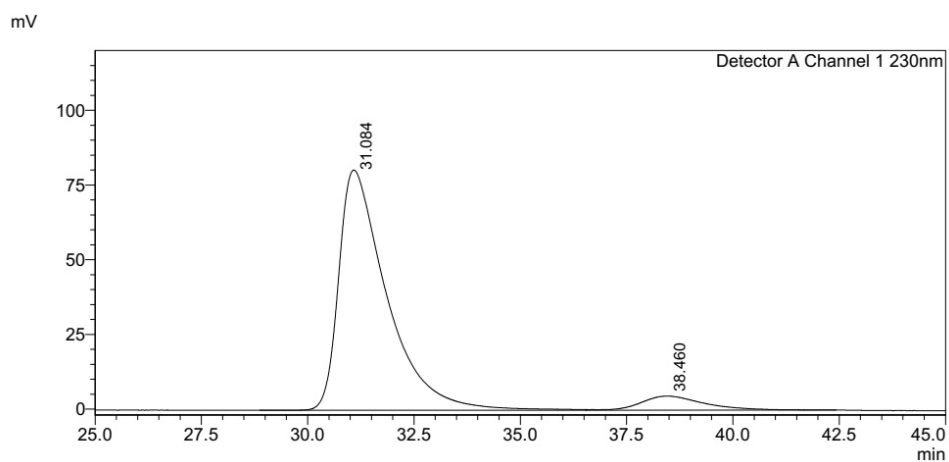

<Peak Table>

Detector A Channel 1 230nm

| Peak# | Ret. Time | Area    | Height | Area%   |
|-------|-----------|---------|--------|---------|
| 1     | 31.084    | 6324957 | 80398  | 92.930  |
| 2     | 38.460    | 481174  | 4707   | 7.070   |
| Total |           | 6806131 | 85104  | 100.000 |

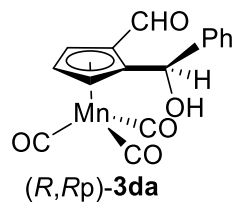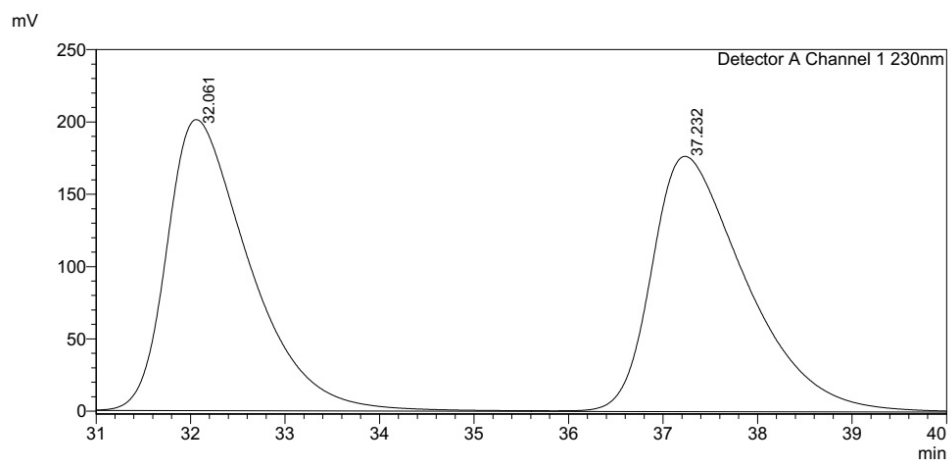

<Peak Table>

Detector A Channel 1 230nm

| Peak# | Ret. Time | Area     | Height | Area%   |
|-------|-----------|----------|--------|---------|
| 1     | 32.061    | 12259335 | 201335 | 49.919  |
| 2     | 37.232    | 12298933 | 176577 | 50.081  |
| Total |           | 24558267 | 377911 | 100.000 |

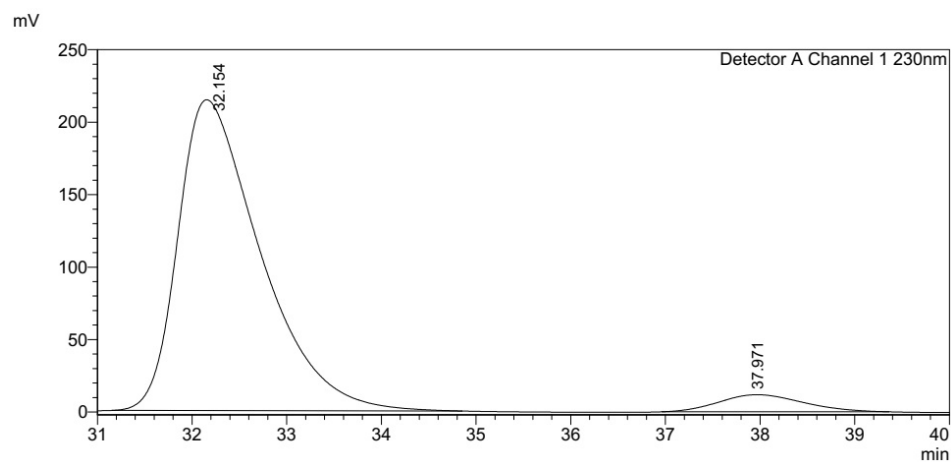

<Peak Table>

Detector A Channel 1 230nm

| Peak# | Ret. Time | Area     | Height | Area%   |
|-------|-----------|----------|--------|---------|
| 1     | 32.154    | 12977772 | 214474 | 94.675  |
| 2     | 37.971    | 729925   | 11804  | 5.325   |
| Total |           | 13707697 | 226278 | 100.000 |



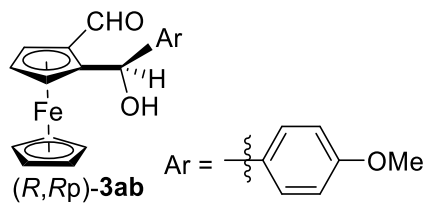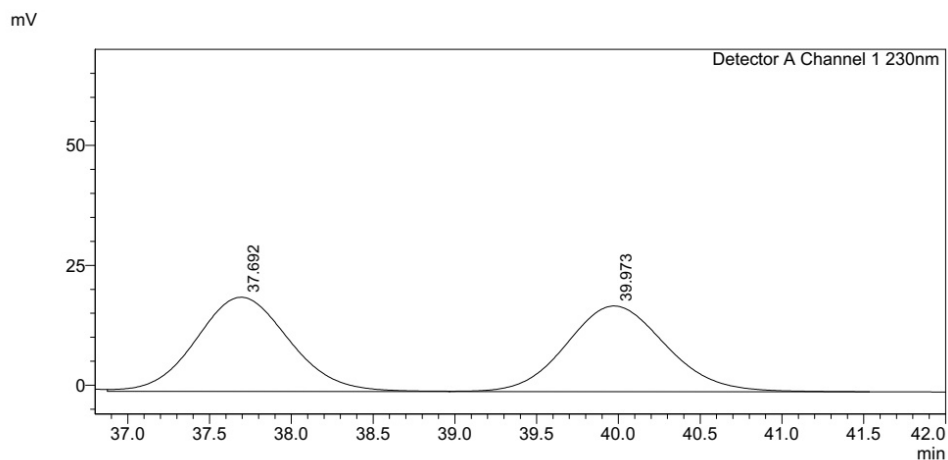

**<Peak Table>**

Detector A Channel 1 230nm

| Peak# | Ret. Time | Area    | Height | Area%   |
|-------|-----------|---------|--------|---------|
| 1     | 37.692    | 782422  | 19629  | 50.798  |
| 2     | 39.973    | 757852  | 17849  | 49.202  |
| Total |           | 1540274 | 37478  | 100.000 |

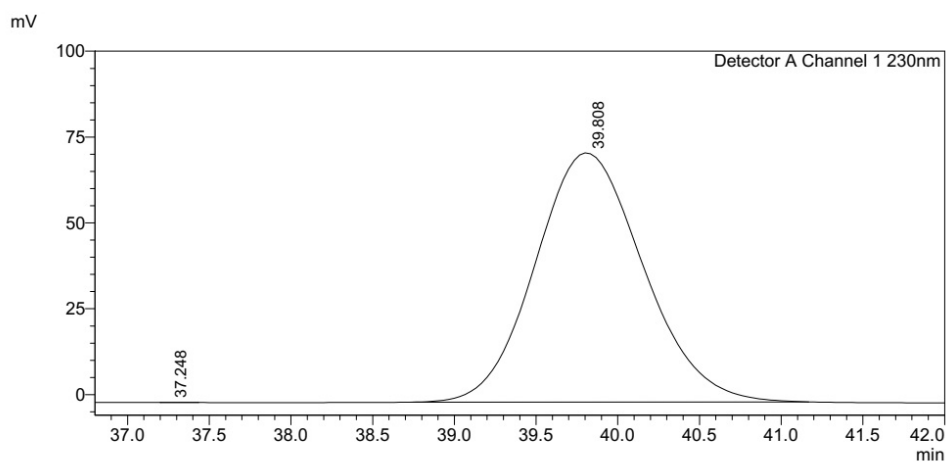

**<Peak Table>**

Detector A Channel 1 230nm

| Peak# | Ret. Time | Area    | Height | Area%   |
|-------|-----------|---------|--------|---------|
| 1     | 37.248    | 39      | 4      | 0.001   |
| 2     | 39.808    | 3341730 | 72569  | 99.999  |
| Total |           | 3341769 | 72573  | 100.000 |

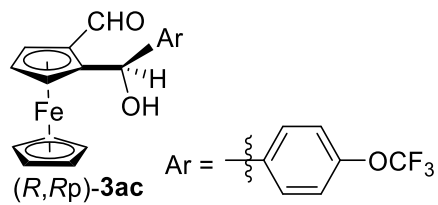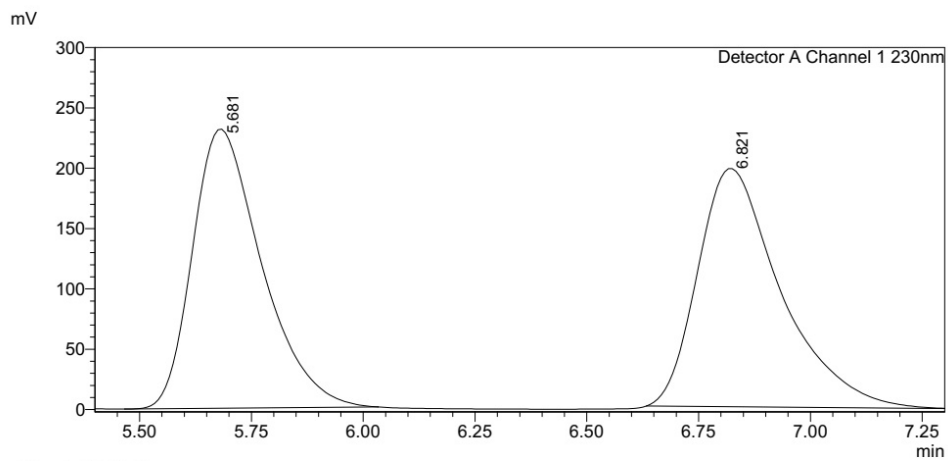

**<Peak Table>**

Detector A Channel 1 230nm

| Peak# | Ret. Time | Area    | Height | Area%   |
|-------|-----------|---------|--------|---------|
| 1     | 5.681     | 2489199 | 231354 | 49.471  |
| 2     | 6.821     | 2542481 | 197356 | 50.529  |
| Total |           | 5031680 | 428710 | 100.000 |

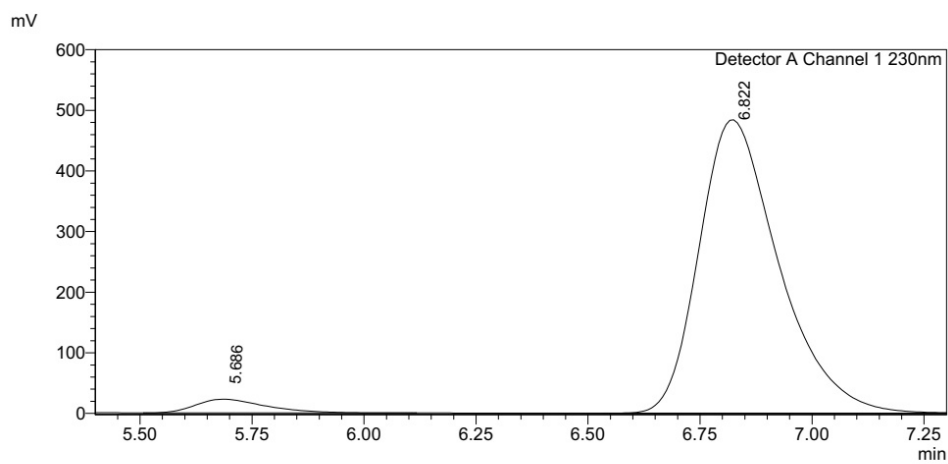

**<Peak Table>**

Detector A Channel 1 230nm

| Peak# | Ret. Time | Area    | Height | Area%   |
|-------|-----------|---------|--------|---------|
| 1     | 5.686     | 243481  | 22662  | 3.906   |
| 2     | 6.822     | 5989673 | 483793 | 96.094  |
| Total |           | 6233154 | 506455 | 100.000 |

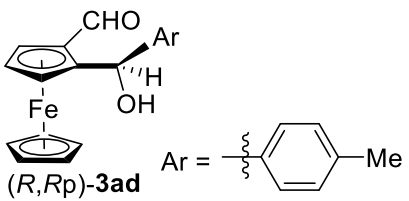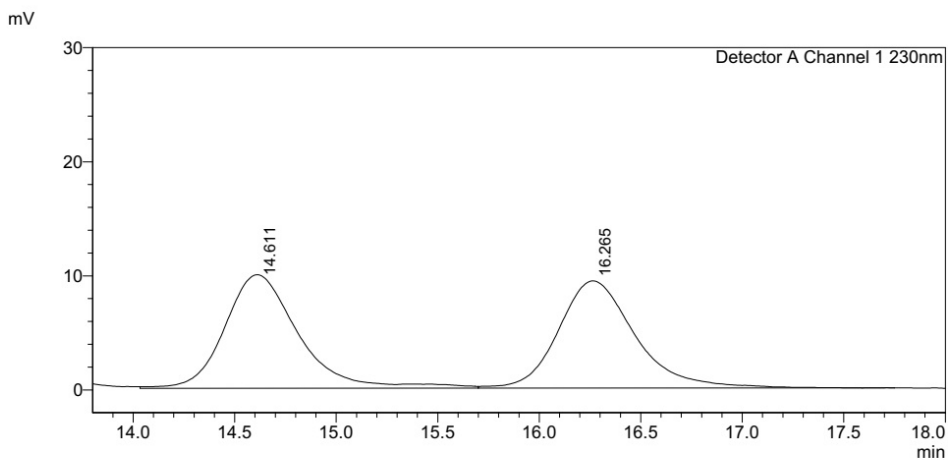

**<Peak Table>**

Detector A Channel 1 230nm

| Peak# | Ret. Time | Area   | Height | Area%   |
|-------|-----------|--------|--------|---------|
| 1     | 14.611    | 253109 | 9959   | 50.583  |
| 2     | 16.265    | 247279 | 9396   | 49.417  |
| Total |           | 500389 | 19355  | 100.000 |

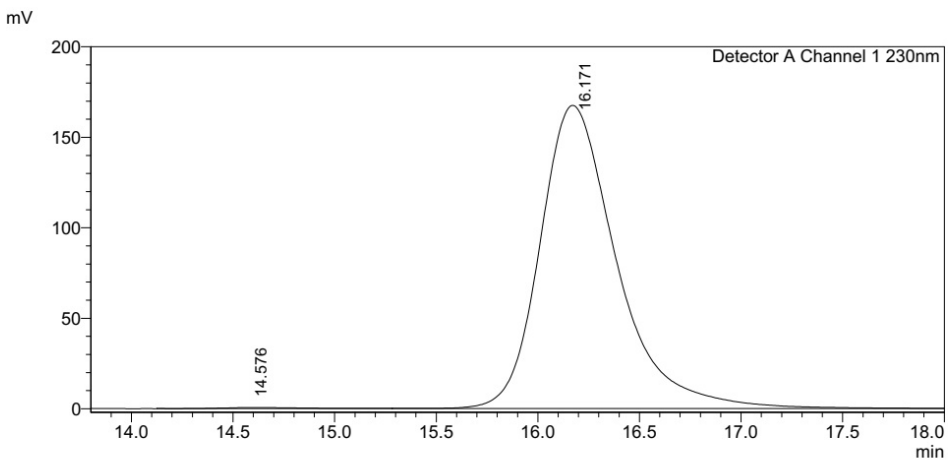

**<Peak Table>**

Detector A Channel 1 230nm

| Peak# | Ret. Time | Area    | Height | Area%   |
|-------|-----------|---------|--------|---------|
| 1     | 14.576    | 18565   | 600    | 0.418   |
| 2     | 16.171    | 4418180 | 167531 | 99.582  |
| Total |           | 4436745 | 168130 | 100.000 |

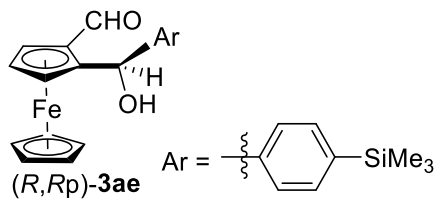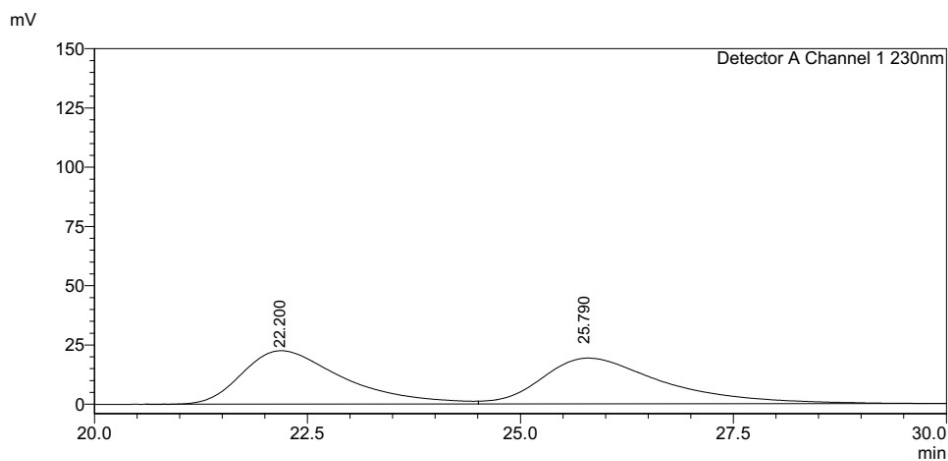

**<Peak Table>**

Detector A Channel 1 230nm

| Peak# | Ret. Time | Area    | Height | Area%   |
|-------|-----------|---------|--------|---------|
| 1     | 22.200    | 1870339 | 22549  | 49.384  |
| 2     | 25.790    | 1917026 | 19312  | 50.616  |
| Total |           | 3787365 | 41860  | 100.000 |

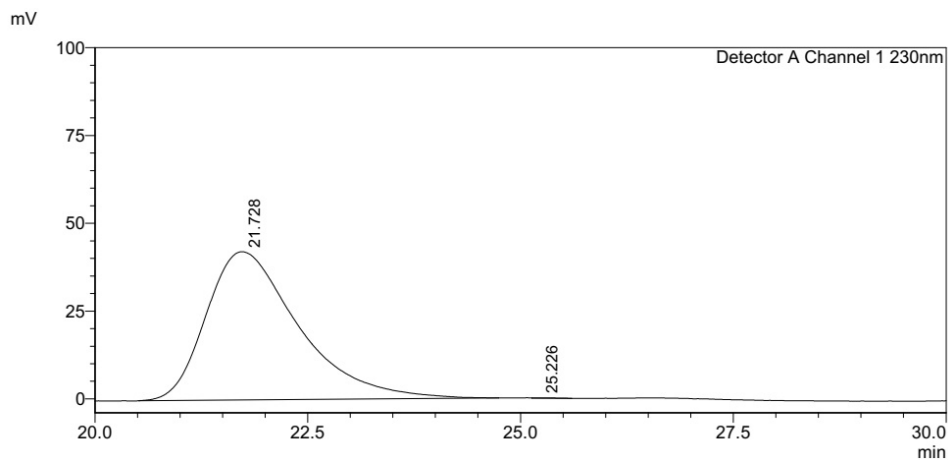

**<Peak Table>**

Detector A Channel 1 230nm

| Peak# | Ret. Time | Area    | Height | Area%   |
|-------|-----------|---------|--------|---------|
| 1     | 21.728    | 3190991 | 42209  | 99.969  |
| 2     | 25.226    | 986     | 50     | 0.031   |
| Total |           | 3191977 | 42259  | 100.000 |

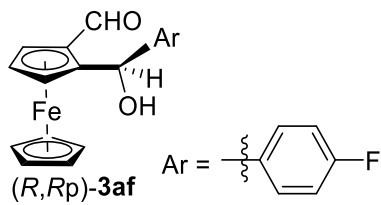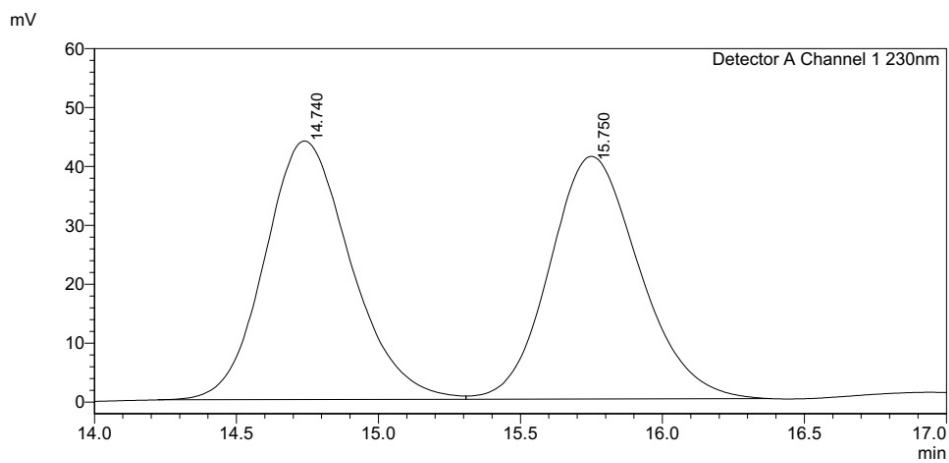

**<Peak Table>**

Detector A Channel 1 230nm

| Peak# | Ret. Time | Area    | Height | Area%   |
|-------|-----------|---------|--------|---------|
| 1     | 14.740    | 926682  | 43913  | 50.549  |
| 2     | 15.750    | 906560  | 41212  | 49.451  |
| Total |           | 1833242 | 85125  | 100.000 |

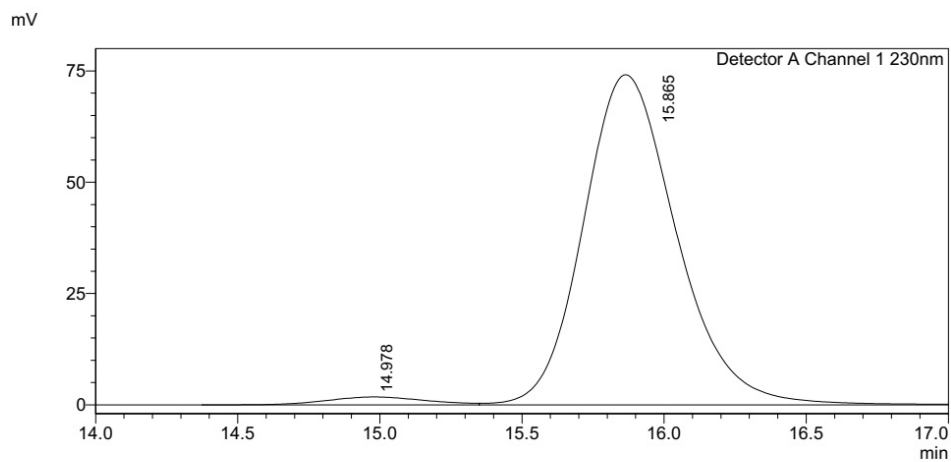

**<Peak Table>**

Detector A Channel 1 230nm

| Peak# | Ret. Time | Area    | Height | Area%   |
|-------|-----------|---------|--------|---------|
| 1     | 14.978    | 43369   | 1782   | 2.493   |
| 2     | 15.865    | 1696011 | 74190  | 97.507  |
| Total |           | 1739380 | 75973  | 100.000 |

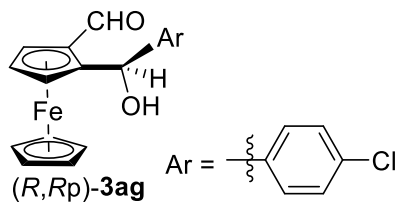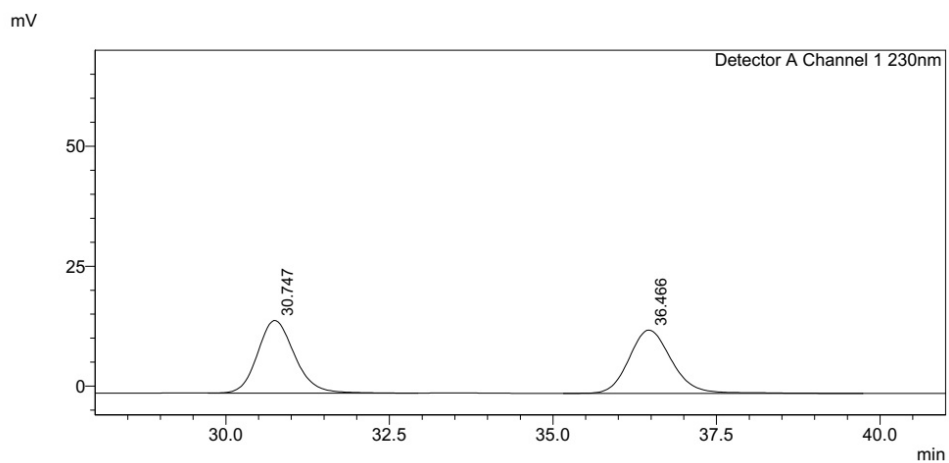

<Peak Table>

Detector A Channel 1 230nm

| Peak# | Ret. Time | Area    | Height | Area%   |
|-------|-----------|---------|--------|---------|
| 1     | 30.747    | 602108  | 15149  | 50.137  |
| 2     | 36.466    | 598829  | 13201  | 49.863  |
| Total |           | 1200937 | 28350  | 100.000 |

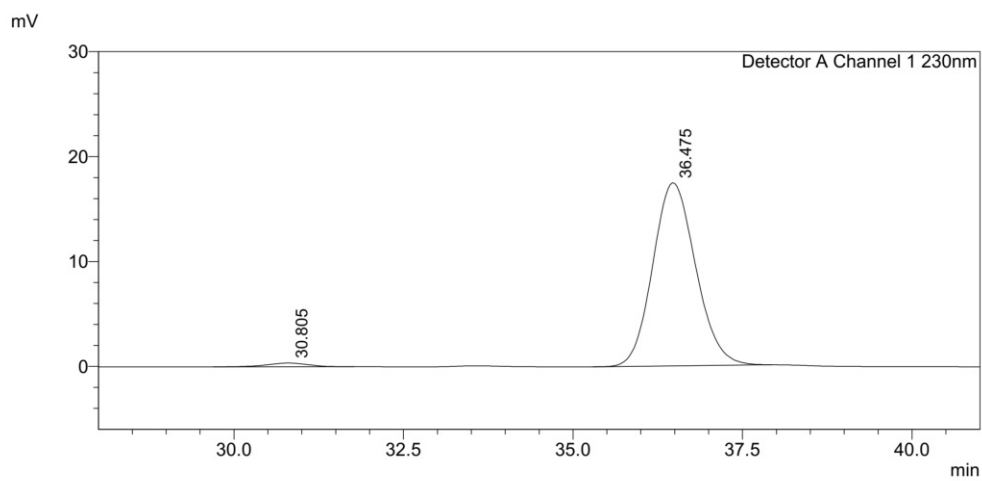

<Peak Table>

Detector A Channel 1 230nm

| Peak# | Ret. Time | Area   | Height | Area%   |
|-------|-----------|--------|--------|---------|
| 1     | 30.805    | 15156  | 358    | 1.933   |
| 2     | 36.475    | 768728 | 17446  | 98.067  |
| Total |           | 783884 | 17804  | 100.000 |

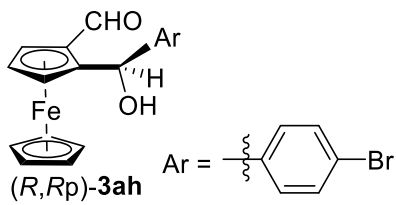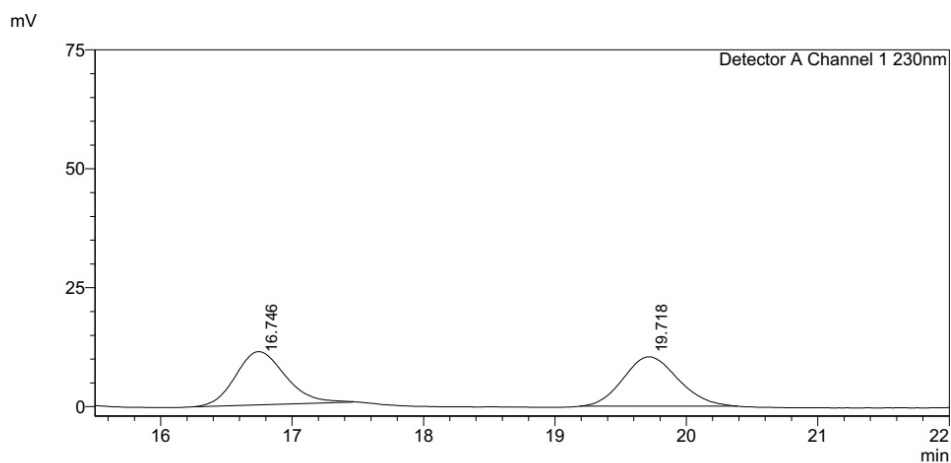

<Peak Table>

Detector A Channel 1 230nm

| Peak# | Ret. Time | Area   | Height | Area%   |
|-------|-----------|--------|--------|---------|
| 1     | 16.746    | 294873 | 11175  | 49.383  |
| 2     | 19.718    | 302239 | 10377  | 50.617  |
| Total |           | 597112 | 21552  | 100.000 |

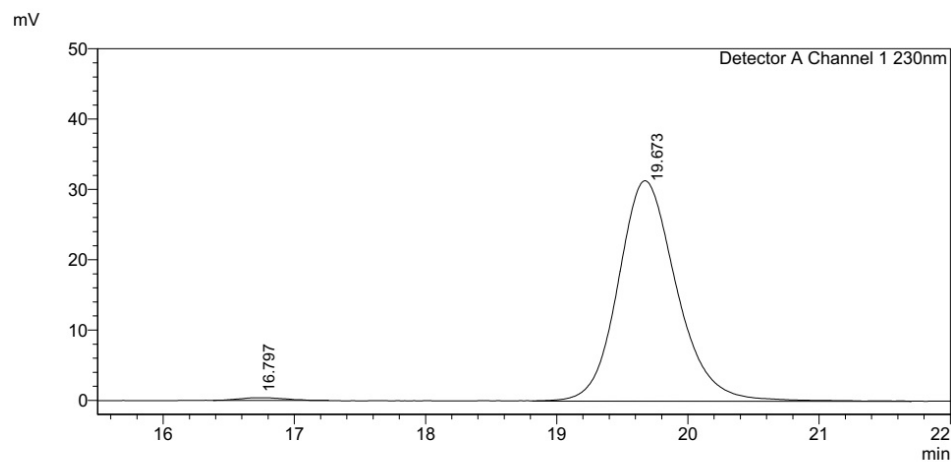

<Peak Table>

Detector A Channel 1 230nm

| Peak# | Ret. Time | Area   | Height | Area%   |
|-------|-----------|--------|--------|---------|
| 1     | 16.797    | 9313   | 385    | 0.948   |
| 2     | 19.673    | 972982 | 31363  | 99.052  |
| Total |           | 982296 | 31748  | 100.000 |

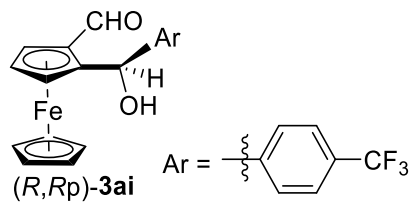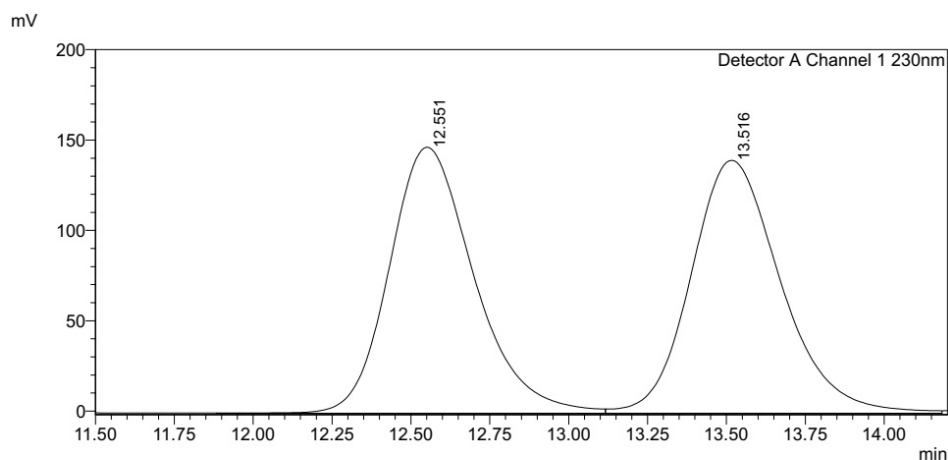

**<Peak Table>**

Detector A Channel 1 230nm

| Peak# | Ret. Time | Area    | Height | Area%   |
|-------|-----------|---------|--------|---------|
| 1     | 12.551    | 2749607 | 147253 | 49.823  |
| 2     | 13.516    | 2769191 | 140027 | 50.177  |
| Total |           | 5518798 | 287281 | 100.000 |

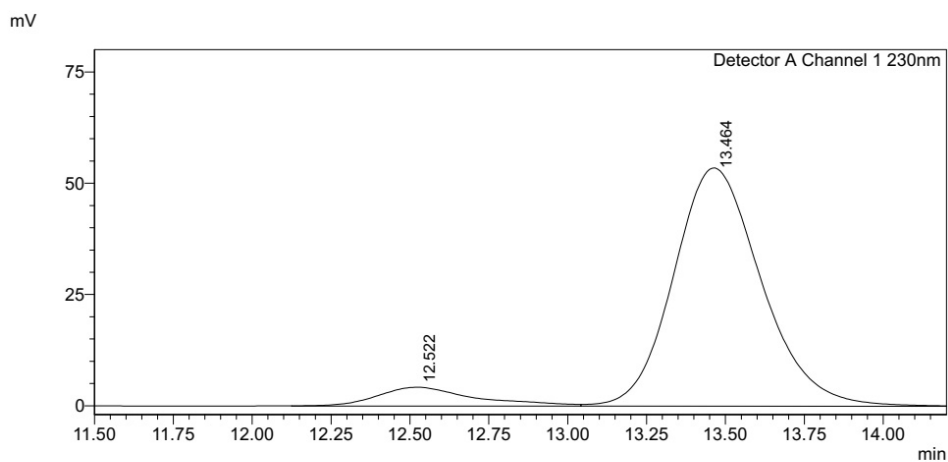

**<Peak Table>**

DDetector A Channel 1 230nm

| Peak# | Ret. Time | Area    | Height | Area%   |
|-------|-----------|---------|--------|---------|
| 1     | 12.522    | 91727   | 4247   | 8.112   |
| 2     | 13.464    | 1038969 | 53530  | 91.888  |
| Total |           | 1130696 | 57777  | 100.000 |



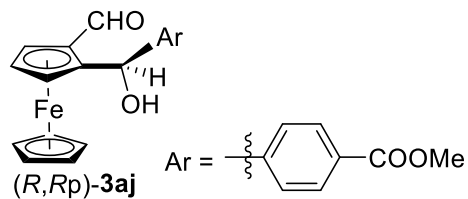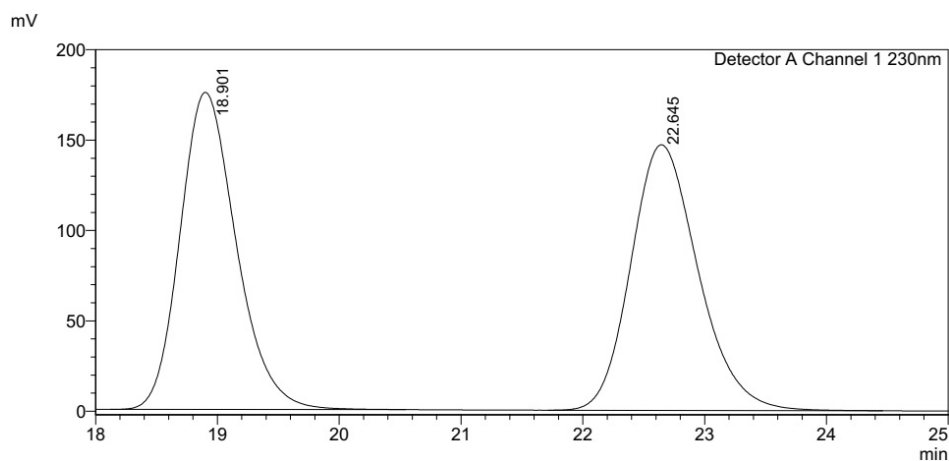

<Peak Table>

Detector A Channel 1 230nm

| Peak# | Ret. Time | Area     | Height | Area%   |
|-------|-----------|----------|--------|---------|
| 1     | 18.901    | 5635354  | 175491 | 49.943  |
| 2     | 22.645    | 5648279  | 146967 | 50.057  |
| Total |           | 11283633 | 322458 | 100.000 |

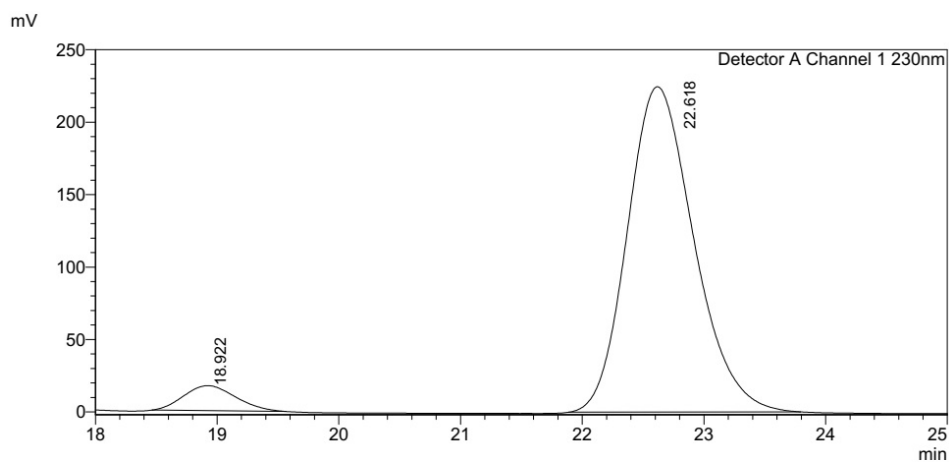

<Peak Table>

Detector A Channel 1 230nm

| Peak# | Ret. Time | Area    | Height | Area%   |
|-------|-----------|---------|--------|---------|
| 1     | 18.922    | 513080  | 17264  | 5.686   |
| 2     | 22.618    | 8510440 | 224560 | 94.314  |
| Total |           | 9023520 | 241824 | 100.000 |

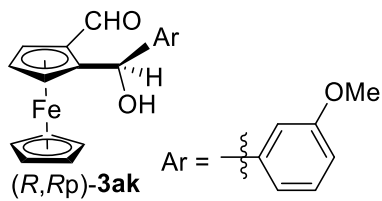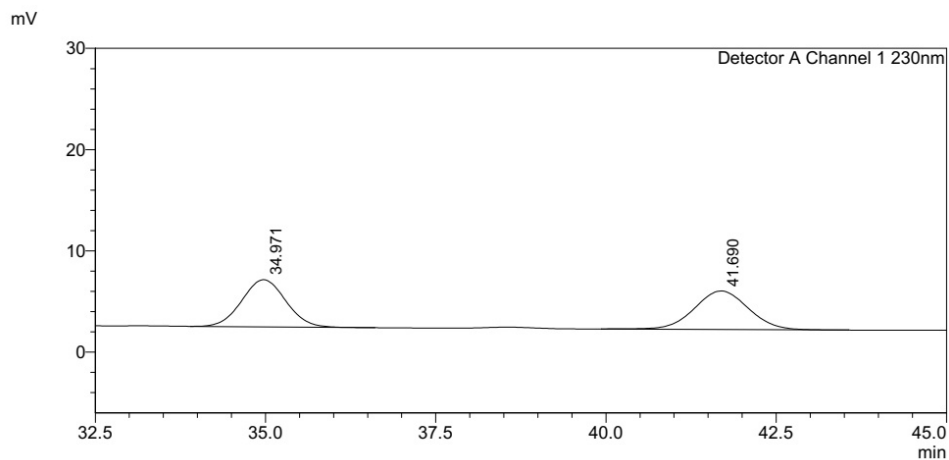

<Peak Table>

Detector A Channel 1 230nm

| Peak# | Ret. Time | Area   | Height | Area%   |
|-------|-----------|--------|--------|---------|
| 1     | 34.971    | 210457 | 4660   | 49.981  |
| 2     | 41.690    | 210620 | 3802   | 50.019  |
| Total |           | 421077 | 8462   | 100.000 |

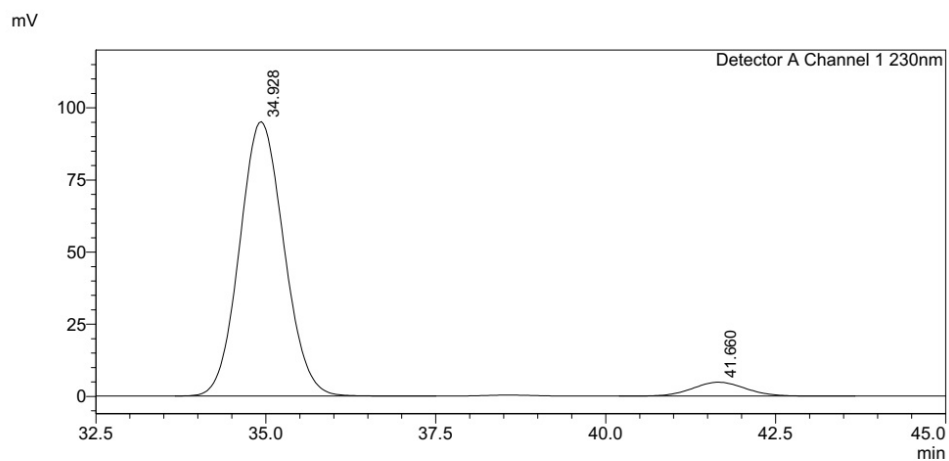

<Peak Table>

Detector A Channel 1 230nm

| Peak# | Ret. Time | Area    | Height | Area%   |
|-------|-----------|---------|--------|---------|
| 1     | 34.928    | 4309910 | 95124  | 94.266  |
| 2     | 41.660    | 262153  | 4807   | 5.734   |
| Total |           | 4572063 | 99931  | 100.000 |

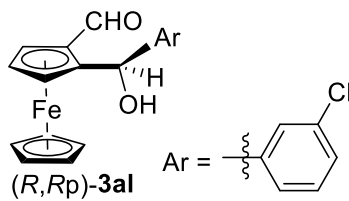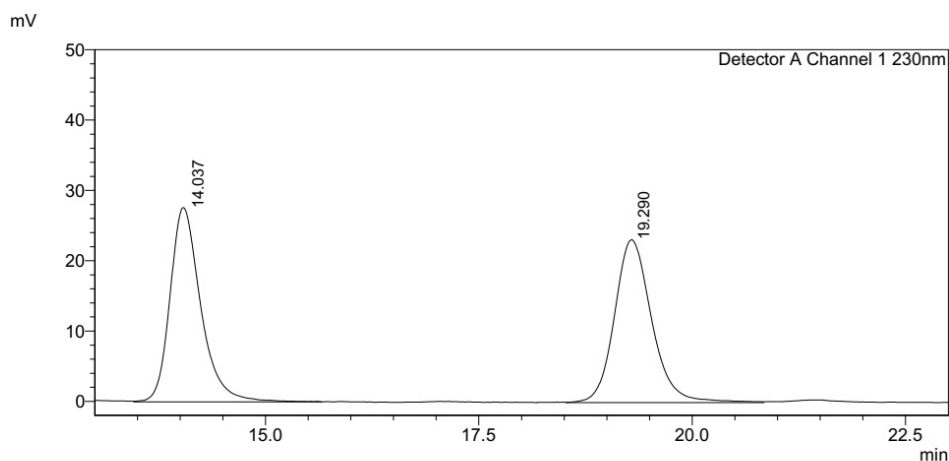

**<Peak Table>**

Detector A Channel 1 230nm

| Peak# | Ret. Time | Area    | Height | Area%   |
|-------|-----------|---------|--------|---------|
| 1     | 14.037    | 692357  | 27618  | 49.642  |
| 2     | 19.290    | 702342  | 23145  | 50.358  |
| Total |           | 1394699 | 50763  | 100.000 |

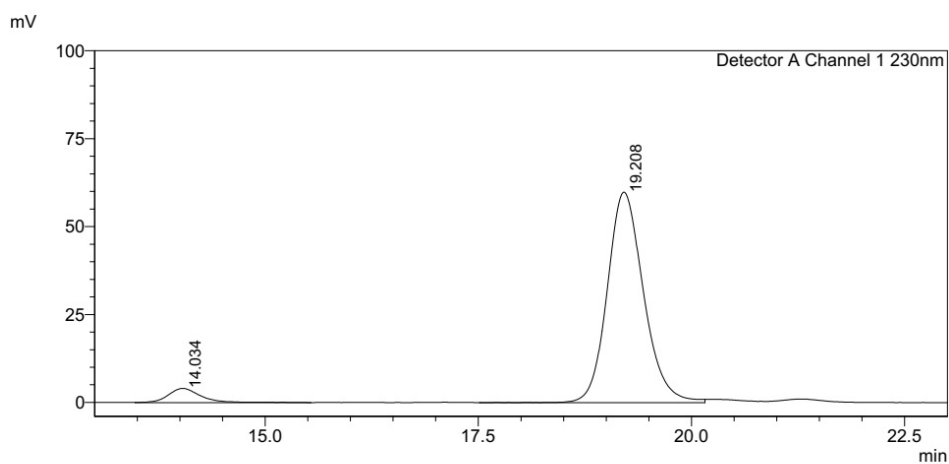

**<Peak Table>**

Detector A Channel 1 230nm

| Peak# | Ret. Time | Area    | Height | Area%   |
|-------|-----------|---------|--------|---------|
| 1     | 14.034    | 106446  | 4024   | 5.669   |
| 2     | 19.208    | 1771125 | 59845  | 94.331  |
| Total |           | 1877571 | 63869  | 100.000 |

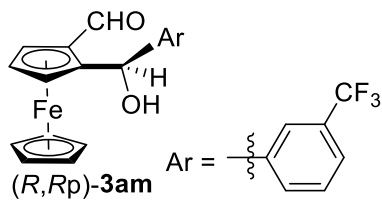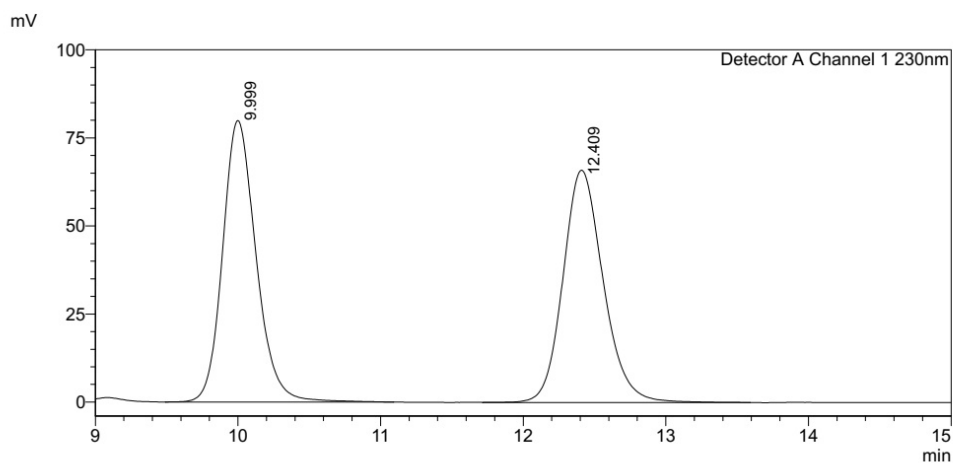

<Peak Table>

Detector A Channel 1 230nm

| Peak# | Ret. Time | Area    | Height | Area%   |
|-------|-----------|---------|--------|---------|
| 1     | 9.999     | 1308166 | 80019  | 50.225  |
| 2     | 12.409    | 1296460 | 66006  | 49.775  |
| Total |           | 2604626 | 146026 | 100.000 |

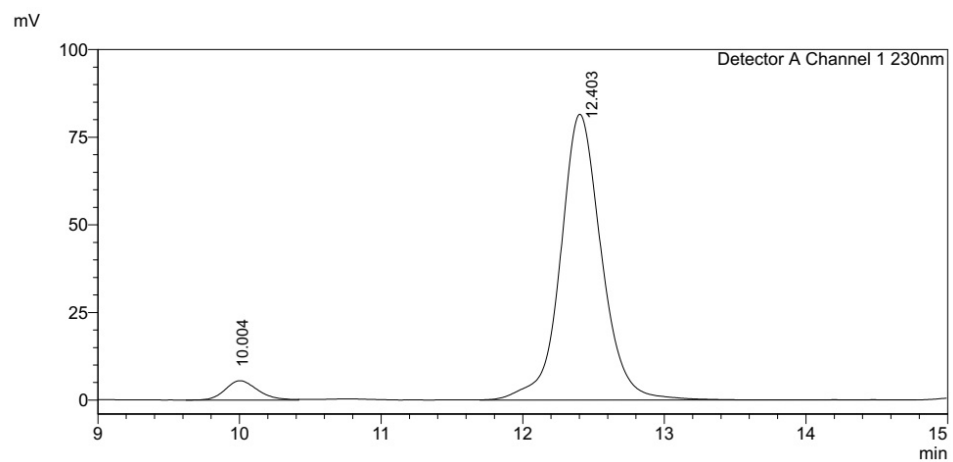

<Peak Table>

Detector A Channel 1 230nm

| Peak# | Ret. Time | Area    | Height | Area%   |
|-------|-----------|---------|--------|---------|
| 1     | 10.004    | 88493   | 5514   | 5.119   |
| 2     | 12.403    | 1640282 | 81520  | 94.881  |
| Total |           | 1728775 | 87035  | 100.000 |

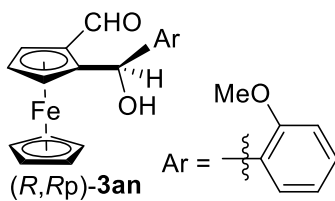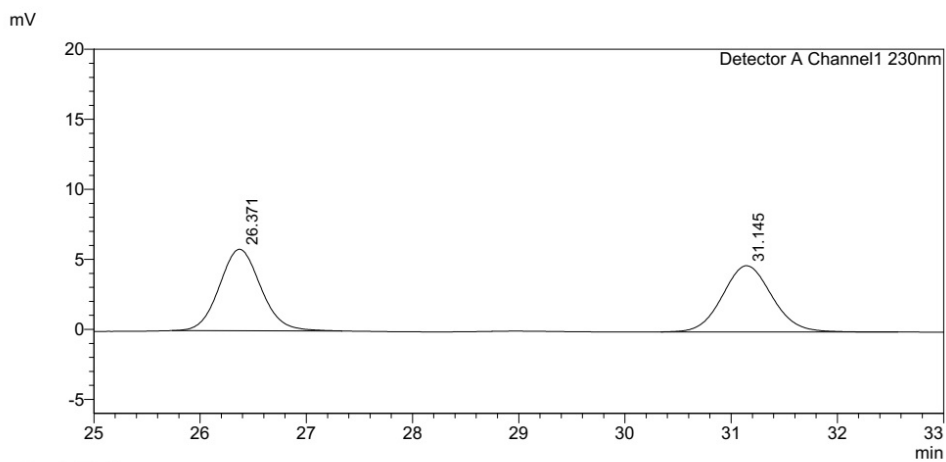

<Peak Table>

| Detector A Channel 1 230nm |           |        |        |         |
|----------------------------|-----------|--------|--------|---------|
| Peak#                      | Ret. Time | Area   | Height | Area%   |
| 1                          | 26.371    | 157838 | 5815   | 50.716  |
| 2                          | 31.145    | 153382 | 4729   | 49.284  |
| Total                      |           | 311220 | 10544  | 100.000 |

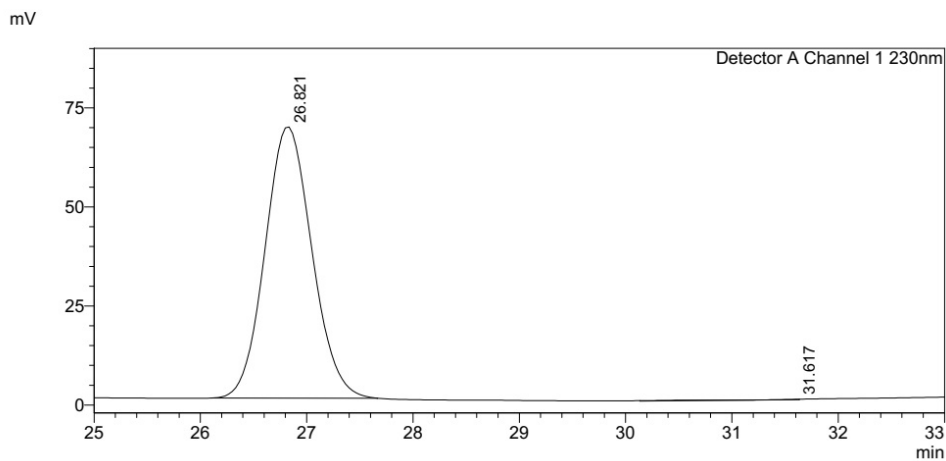

<Peak Table>

| Detector A Channel 1 230nm |           |         |        |         |
|----------------------------|-----------|---------|--------|---------|
| Peak#                      | Ret. Time | Area    | Height | Area%   |
| 1                          | 26.821    | 2098191 | 68438  | 99.741  |
| 2                          | 31.617    | 5448    | 94     | 0.259   |
| Total                      |           | 2103639 | 68532  | 100.000 |

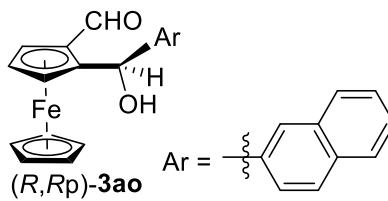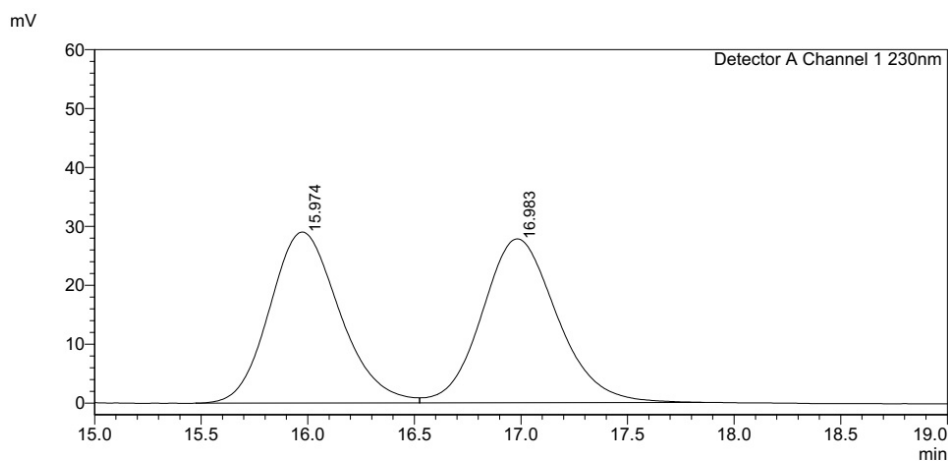

<Peak Table>

Detector A Channel 1 230nm

| Peak# | Ret. Time | Area    | Height | Area%   |
|-------|-----------|---------|--------|---------|
| 1     | 15.974    | 664119  | 29035  | 49.348  |
| 2     | 16.983    | 681657  | 27819  | 50.652  |
| Total |           | 1345776 | 56854  | 100.000 |

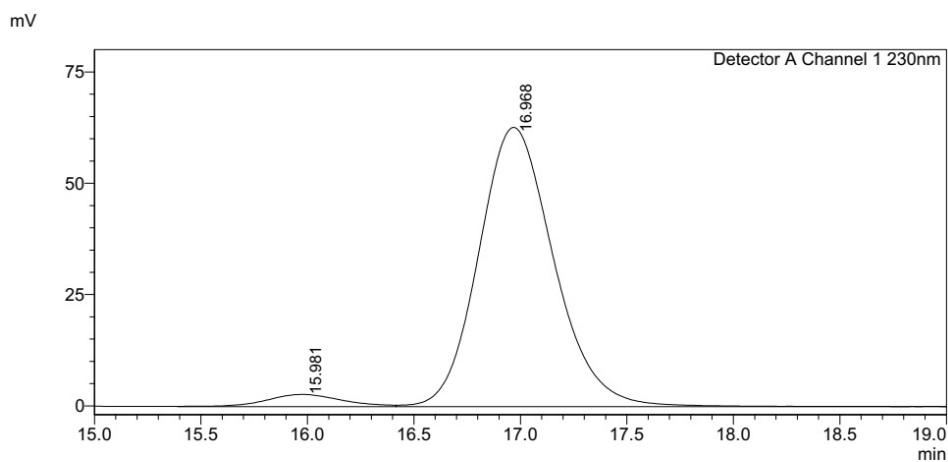

<Peak Table>

Detector A Channel 1 230nm

| Peak# | Ret. Time | Area    | Height | Area%   |
|-------|-----------|---------|--------|---------|
| 1     | 15.981    | 69490   | 2774   | 4.304   |
| 2     | 16.968    | 1544987 | 62761  | 95.696  |
| Total |           | 1614477 | 65535  | 100.000 |

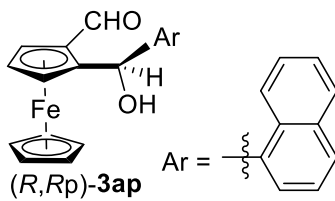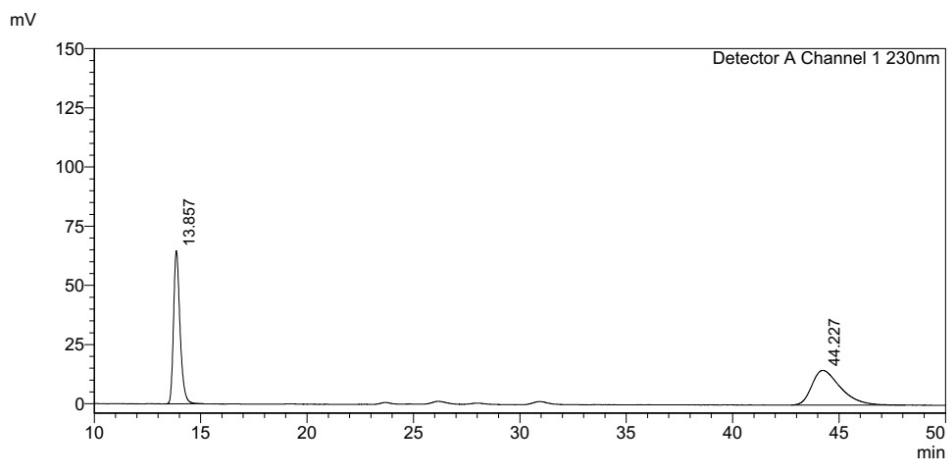

<Peak Table>

Detector A Channel 1 230nm

| Peak# | Ret. Time | Area    | Height | Area%   |
|-------|-----------|---------|--------|---------|
| 1     | 13.857    | 1373689 | 64724  | 49.950  |
| 2     | 44.227    | 1376463 | 14675  | 50.050  |
| Total |           | 2750153 | 79399  | 100.000 |

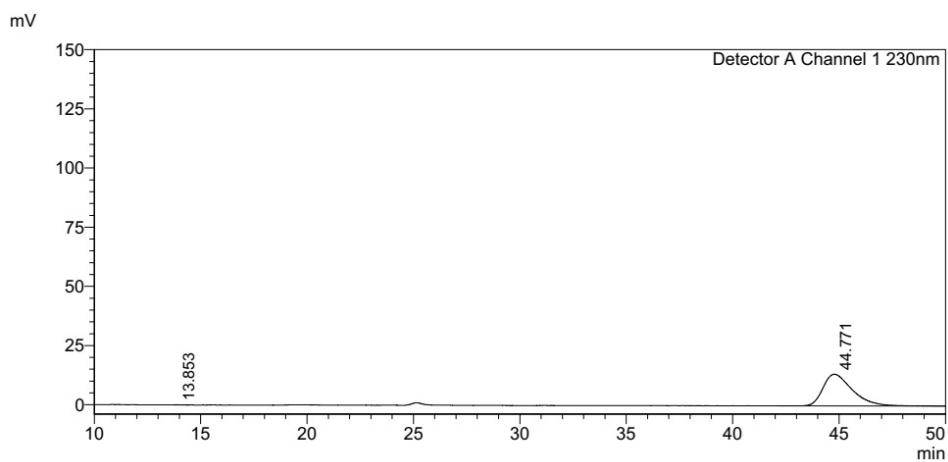

<Peak Table>

Detector A Channel 1 230nm

| Peak# | Ret. Time | Area    | Height | Area%   |
|-------|-----------|---------|--------|---------|
| 1     | 13.853    | 1211    | 79     | 0.094   |
| 2     | 44.771    | 1287766 | 13418  | 99.906  |
| Total |           | 1288977 | 13496  | 100.000 |

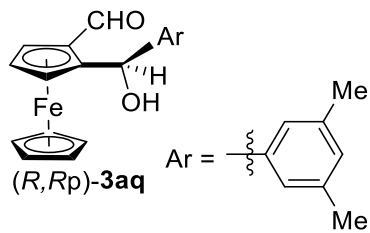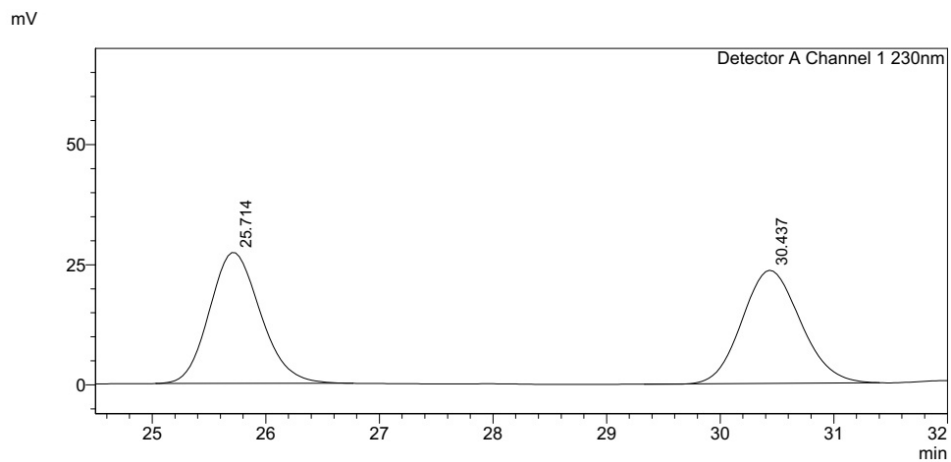

<Peak Table>

| Detector A Channel 1 230nm |           |         |        |         |
|----------------------------|-----------|---------|--------|---------|
| Peak#                      | Ret. Time | Area    | Height | Area%   |
| 1                          | 25.714    | 852668  | 27214  | 50.300  |
| 2                          | 30.437    | 842484  | 23535  | 49.700  |
| Total                      |           | 1695153 | 50748  | 100.000 |

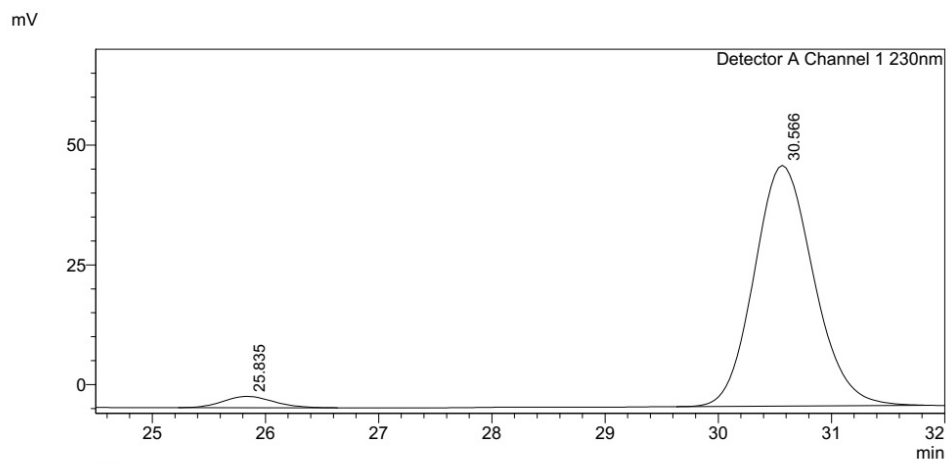

<Peak Table>

| Detector A Channel 1 230nm |           |         |        |         |
|----------------------------|-----------|---------|--------|---------|
| Peak#                      | Ret. Time | Area    | Height | Area%   |
| 1                          | 25.835    | 73185   | 2361   | 3.832   |
| 2                          | 30.566    | 1836794 | 50237  | 96.168  |
| Total                      |           | 1909979 | 52598  | 100.000 |



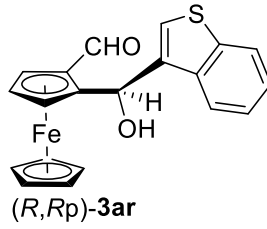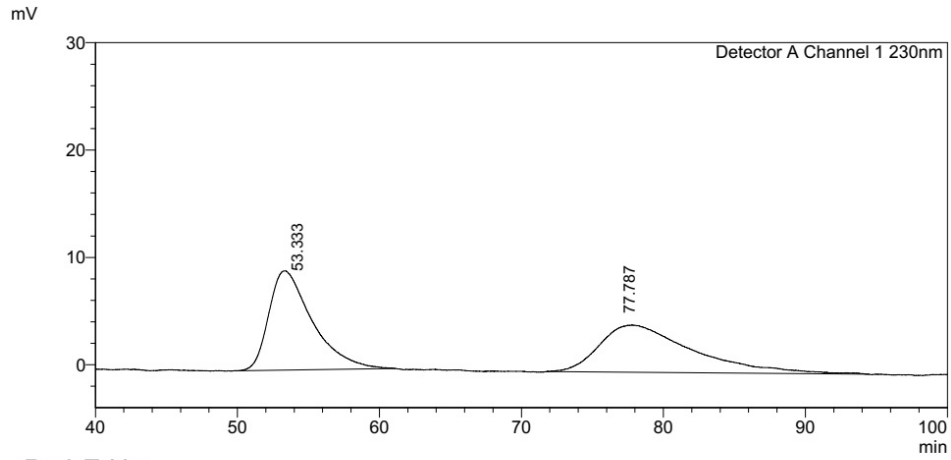

<Peak Table>

Detector A Channel 1 230nm

| Peak# | Ret. Time | Area    | Height | Area%   |
|-------|-----------|---------|--------|---------|
| 1     | 53.333    | 1963900 | 9241   | 49.546  |
| 2     | 77.787    | 1999926 | 4401   | 50.454  |
| Total |           | 3963826 | 13642  | 100.000 |

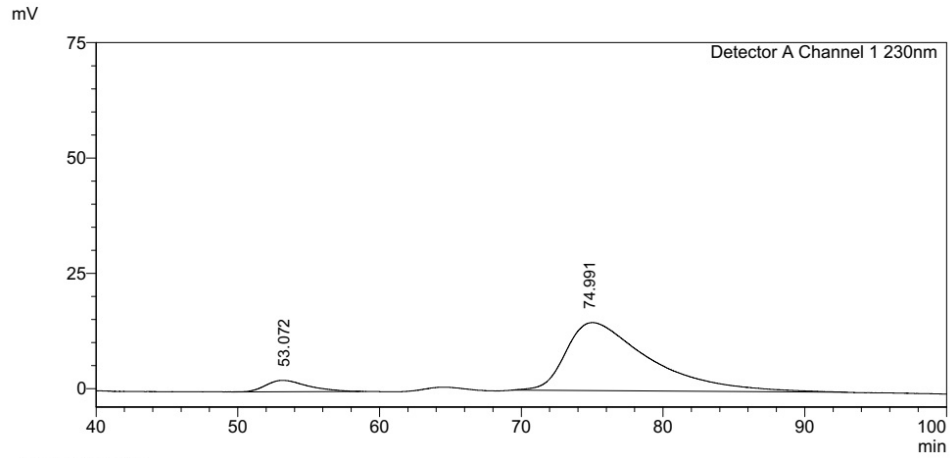

<Peak Table>

Detector A Channel 1 230nm

| Peak# | Ret. Time | Area    | Height | Area%   |
|-------|-----------|---------|--------|---------|
| 1     | 53.072    | 497142  | 2458   | 7.614   |
| 2     | 74.991    | 6032035 | 14760  | 92.386  |
| Total |           | 6529176 | 17218  | 100.000 |

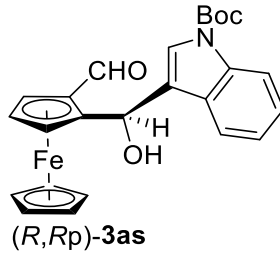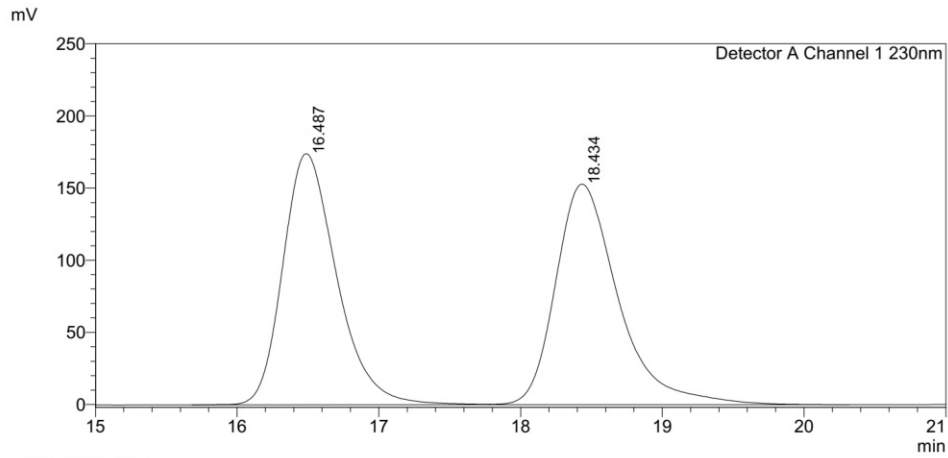

<Peak Table>

Detector A Channel 1 230nm

| Peak# | Ret. Time | Area    | Height | Area%   |
|-------|-----------|---------|--------|---------|
| 1     | 16.487    | 4610998 | 174068 | 49.485  |
| 2     | 18.434    | 4706897 | 152971 | 50.515  |
| Total |           | 9317895 | 327039 | 100.000 |

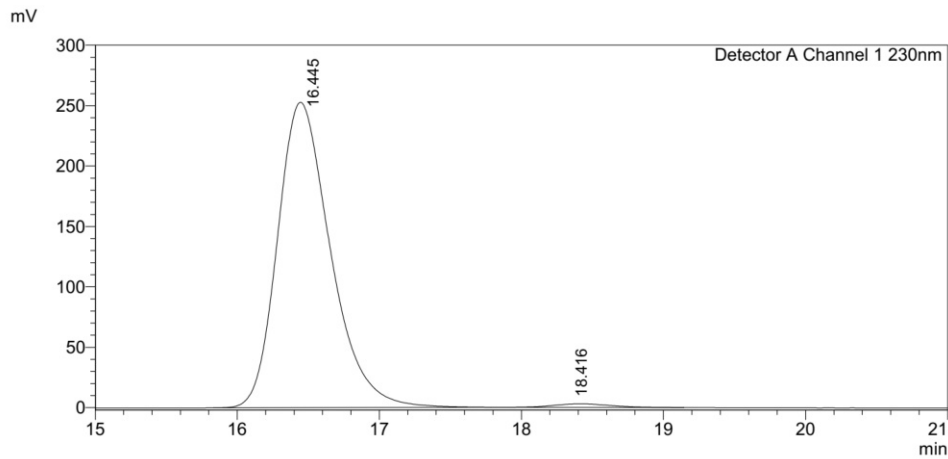

<Peak Table>

Detector A Channel 1 230nm

| Peak# | Ret. Time | Area    | Height | Area%   |
|-------|-----------|---------|--------|---------|
| 1     | 16.445    | 6559970 | 252788 | 98.719  |
| 2     | 18.416    | 85126   | 3061   | 1.281   |
| Total |           | 6645097 | 255849 | 100.000 |

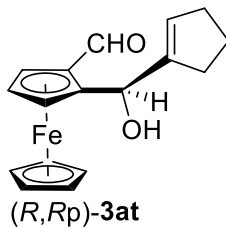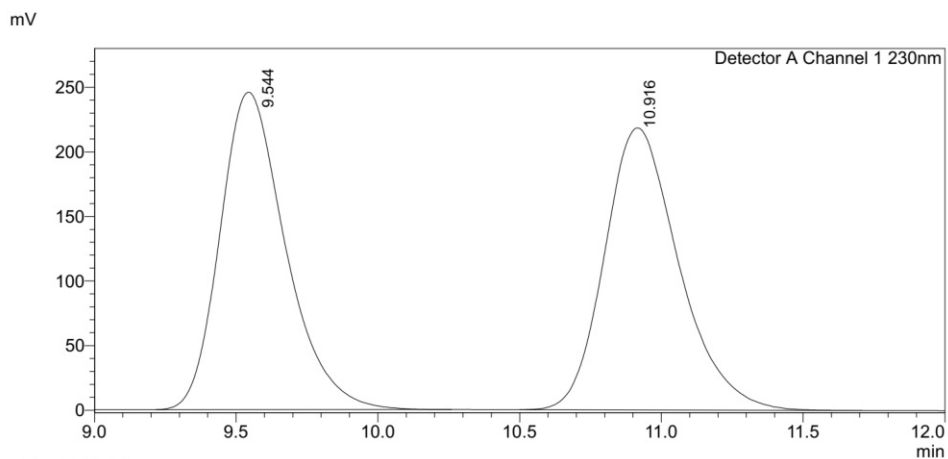

<Peak Table>

Detector A Channel 1 230nm

| Peak# | Ret. Time | Area    | Height | Area%   |
|-------|-----------|---------|--------|---------|
| 1     | 9.544     | 3962715 | 245934 | 49.865  |
| 2     | 10.916    | 3984135 | 218544 | 50.135  |
| Total |           | 7946850 | 464478 | 100.000 |

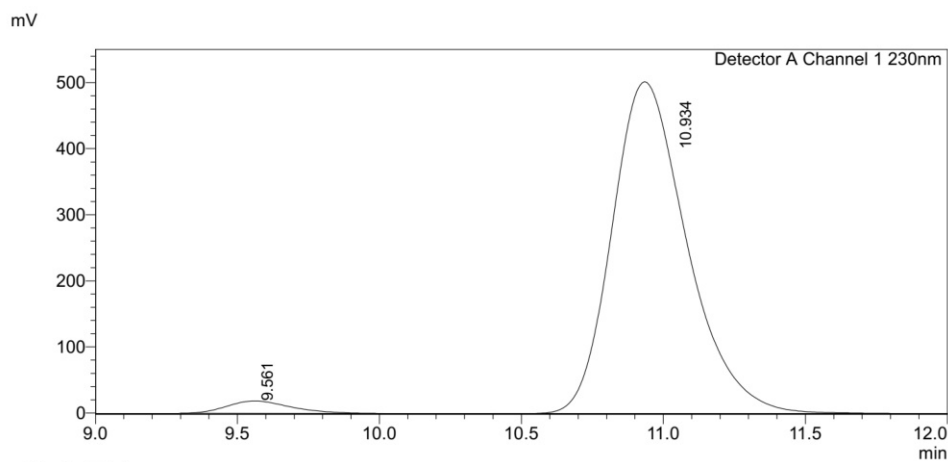

<Peak Table>

Detector A Channel 1 230nm

| Peak# | Ret. Time | Area    | Height | Area%   |
|-------|-----------|---------|--------|---------|
| 1     | 9.561     | 296302  | 18763  | 3.113   |
| 2     | 10.934    | 9222073 | 502163 | 96.887  |
| Total |           | 9518375 | 520926 | 100.000 |

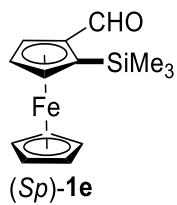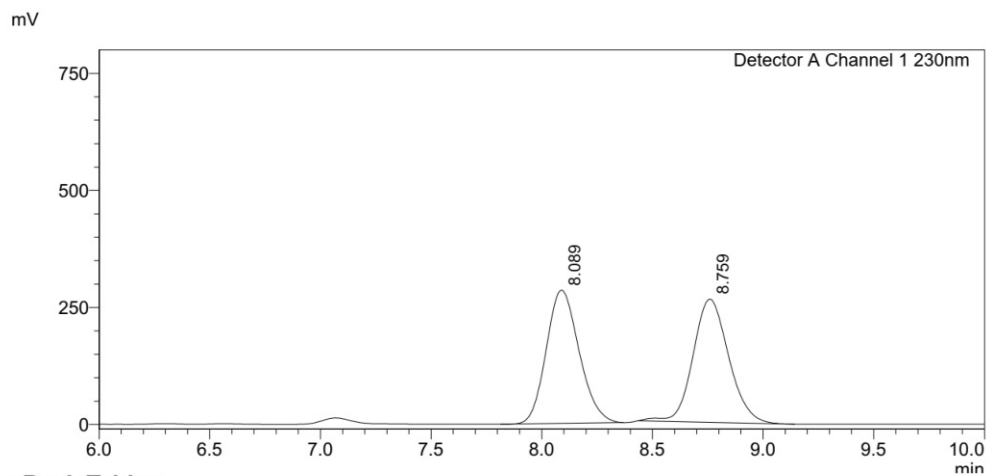

<Peak Table>

Detector A Channel 1 230nm

| Peak# | Ret. Time | Area    | Height | Area%   |
|-------|-----------|---------|--------|---------|
| 1     | 8.089     | 2945520 | 284840 | 49.892  |
| 2     | 8.759     | 2958291 | 263536 | 50.108  |
| Total |           | 5903810 | 548376 | 100.000 |

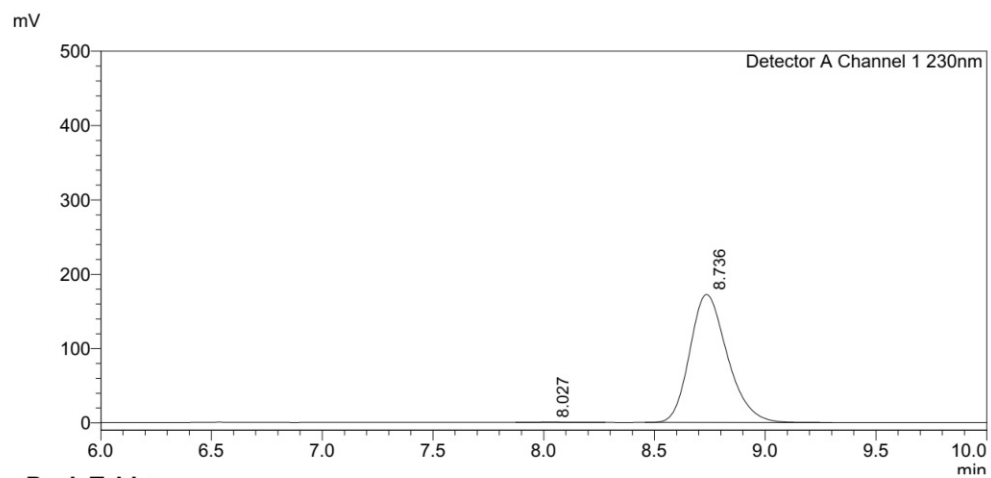

<Peak Table>

Detector A Channel 1 230nm

| Peak# | Ret. Time | Area    | Height | Area%   |
|-------|-----------|---------|--------|---------|
| 1     | 8.027     | 3285    | 325    | 0.161   |
| 2     | 8.736     | 2038092 | 172322 | 99.839  |
| Total |           | 2041377 | 172647 | 100.000 |

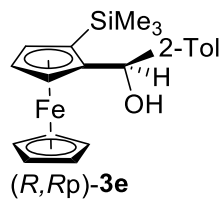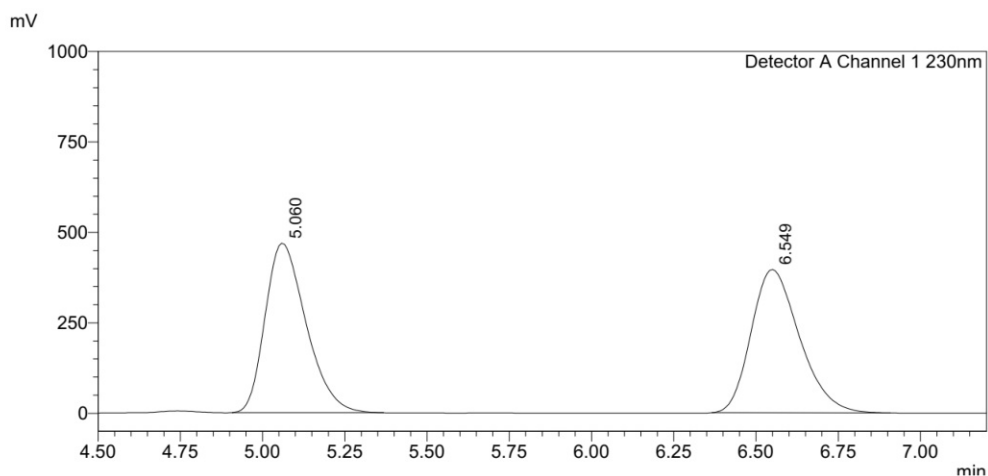

**<Peak Table>**

Detector A Channel 1 230nm

| Peak# | Ret. Time | Area    | Height | Area%   |
|-------|-----------|---------|--------|---------|
| 1     | 5.060     | 4049393 | 468303 | 49.980  |
| 2     | 6.549     | 4052645 | 396332 | 50.020  |
| Total |           | 8102038 | 864635 | 100.000 |

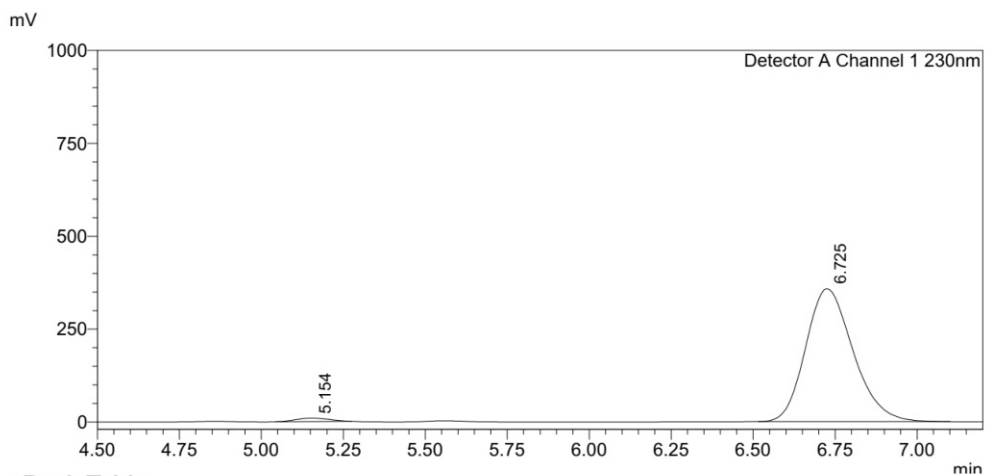

**<Peak Table>**

Detector A Channel 1 230nm

| Peak# | Ret. Time | Area    | Height | Area%   |
|-------|-----------|---------|--------|---------|
| 1     | 5.154     | 66471   | 9243   | 1.808   |
| 2     | 6.725     | 3609524 | 357783 | 98.192  |
| Total |           | 3675995 | 367026 | 100.000 |

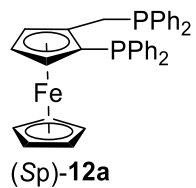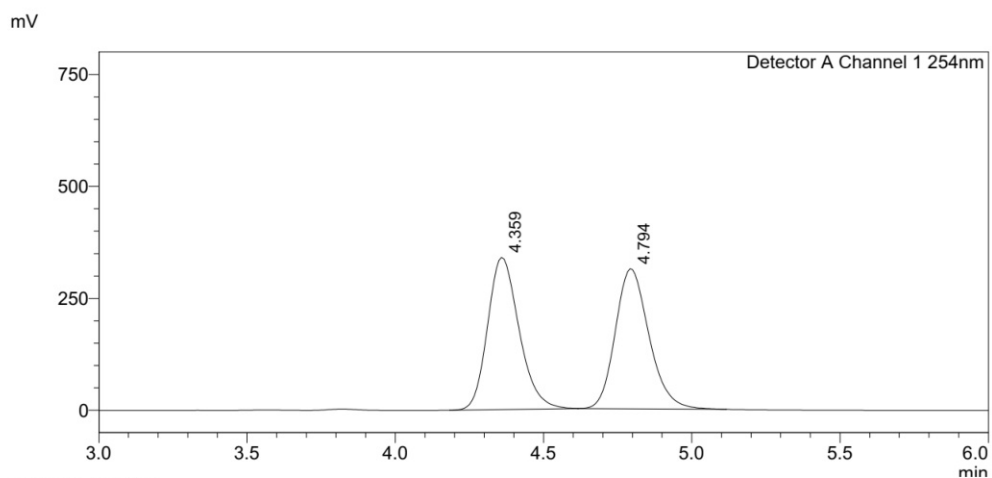

<Peak Table>

Detector A Channel 1 254nm

| Peak# | Ret. Time | Area    | Height | Area%   |
|-------|-----------|---------|--------|---------|
| 1     | 4.359     | 2505315 | 339449 | 50.358  |
| 2     | 4.794     | 2469718 | 312817 | 49.642  |
| Total |           | 4975033 | 652266 | 100.000 |

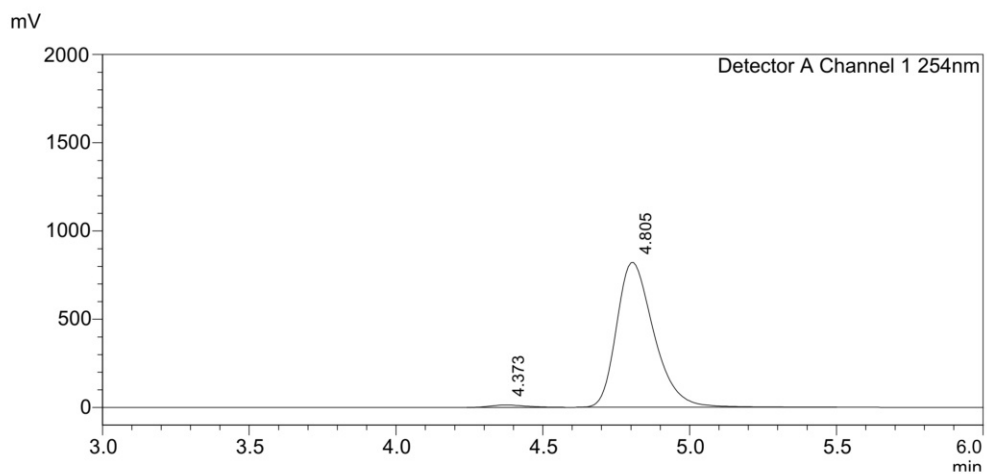

<Peak Table>

Detector A Channel 1 254nm

| Peak# | Ret. Time | Area    | Height | Area%   |
|-------|-----------|---------|--------|---------|
| 1     | 4.373     | 113944  | 13966  | 1.549   |
| 2     | 4.805     | 7243010 | 820187 | 98.451  |
| Total |           | 7356954 | 834153 | 100.000 |

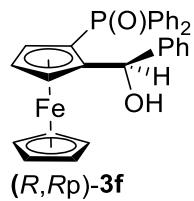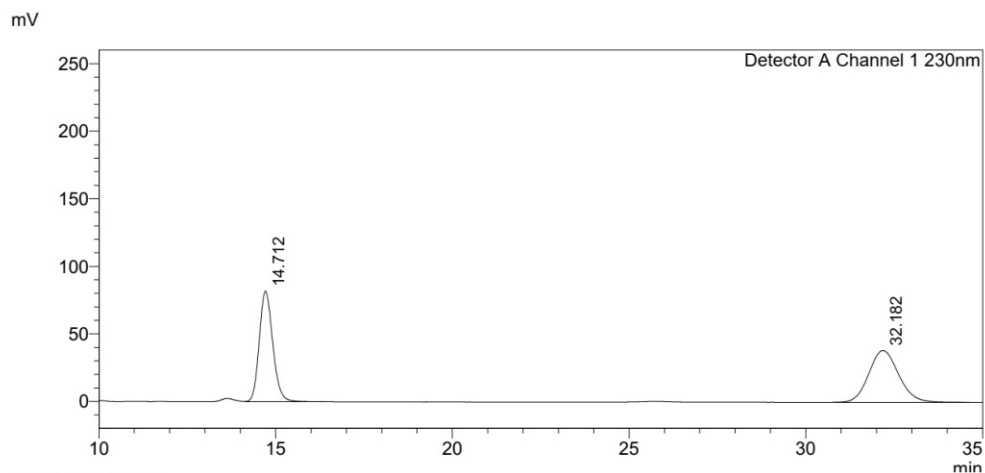

**<Peak Table>**

Detector A Channel 1 230nm

| Peak# | Ret. Time | Area    | Height | Area%   |
|-------|-----------|---------|--------|---------|
| 1     | 14.712    | 2182821 | 81865  | 49.088  |
| 2     | 32.182    | 2263968 | 38389  | 50.912  |
| Total |           | 4446789 | 120254 | 100.000 |

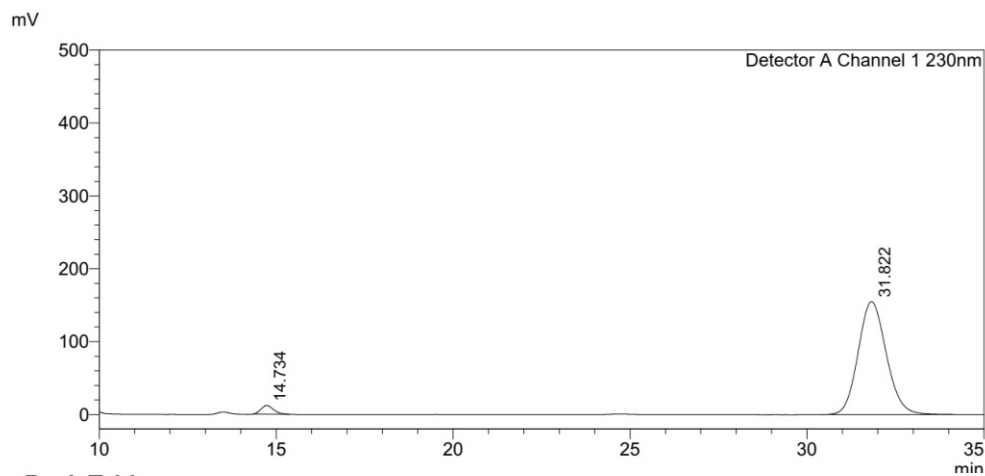

**<Peak Table>**

Detector A Channel 1 230nm

| Peak# | Ret. Time | Area    | Height | Area%   |
|-------|-----------|---------|--------|---------|
| 1     | 14.734    | 289484  | 11812  | 3.265   |
| 2     | 31.822    | 8575968 | 154853 | 96.735  |
| Total |           | 8865451 | 166665 | 100.000 |

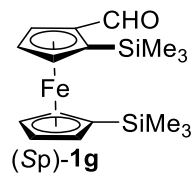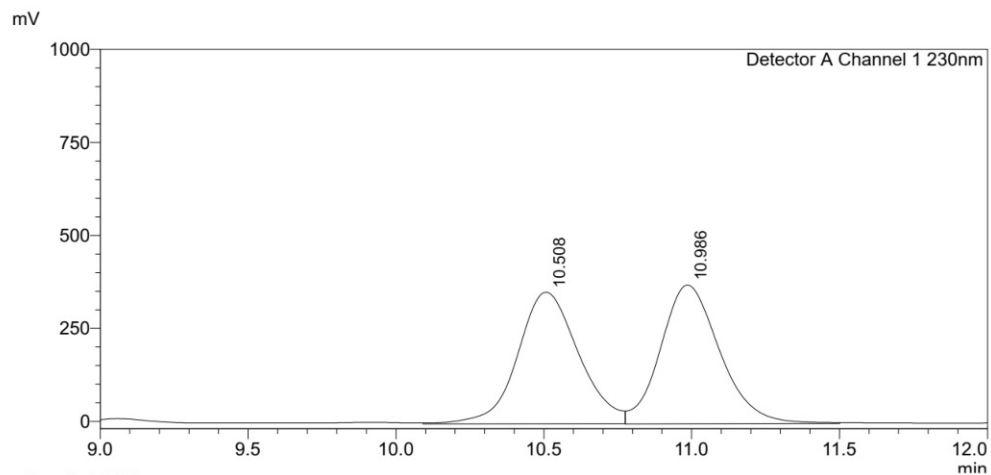

<Peak Table>

Detector A Channel 1 230nm

| Peak# | Ret. Time | Area     | Height | Area%   |
|-------|-----------|----------|--------|---------|
| 1     | 10.508    | 5089602  | 354047 | 49.475  |
| 2     | 10.986    | 5197704  | 373157 | 50.525  |
| Total |           | 10287306 | 727205 | 100.000 |

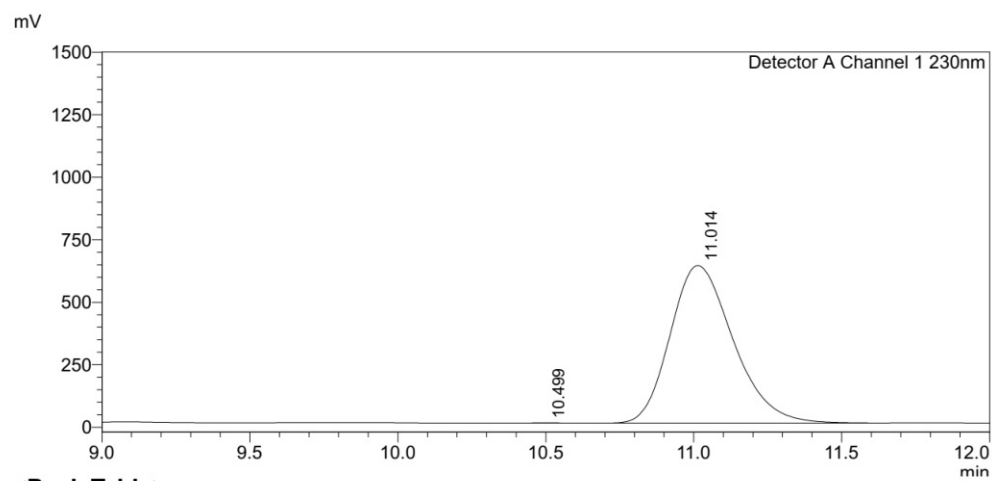

<Peak Table>

Detector A Channel 1 230nm

| Peak# | Ret. Time | Area    | Height | Area%   |
|-------|-----------|---------|--------|---------|
| 1     | 10.499    | 12240   | 970    | 0.131   |
| 2     | 11.014    | 9346431 | 630163 | 99.869  |
| Total |           | 9358671 | 631133 | 100.000 |



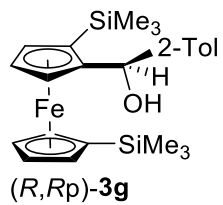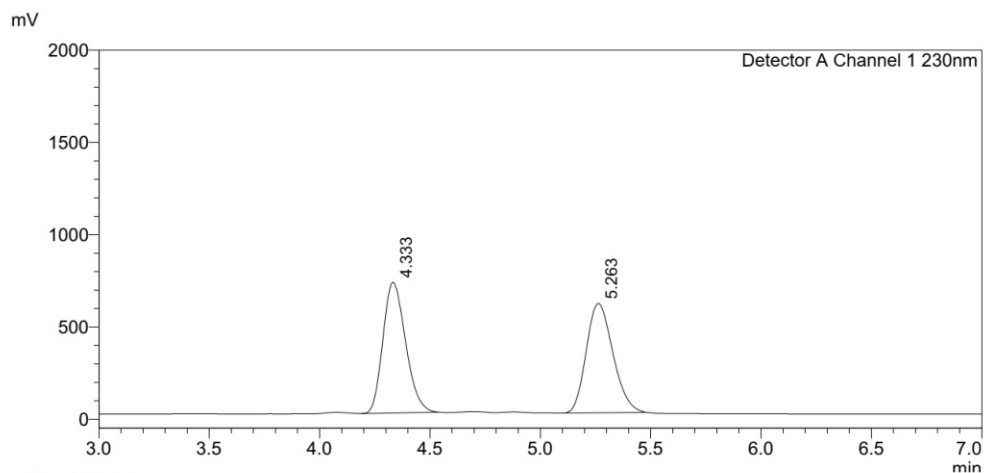

**<Peak Table>**

Detector A Channel 1 230nm

| Peak# | Ret. Time | Area     | Height  | Area%   |
|-------|-----------|----------|---------|---------|
| 1     | 4.333     | 5067708  | 709305  | 50.341  |
| 2     | 5.263     | 4999062  | 591979  | 49.659  |
| Total |           | 10066770 | 1301284 | 100.000 |

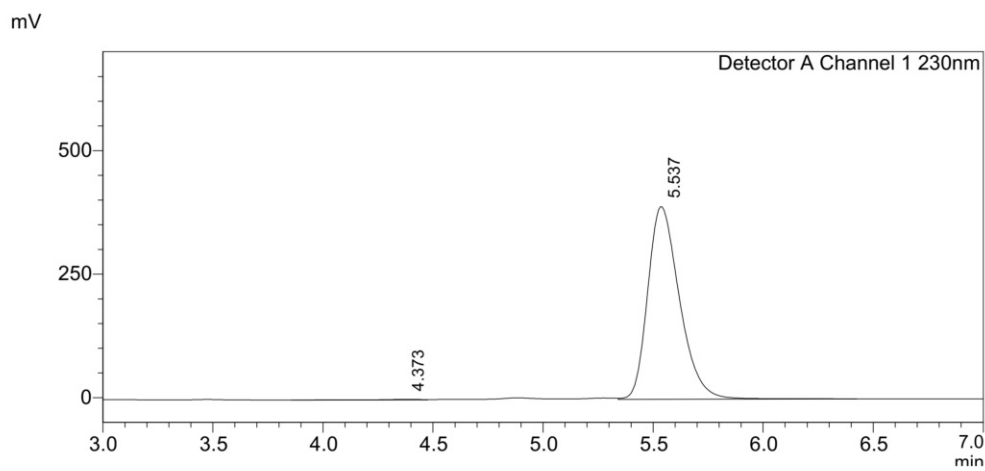

**<Peak Table>**

Detector A Channel 1 230nm

| Peak# | Ret. Time | Area    | Height | Area%   |
|-------|-----------|---------|--------|---------|
| 1     | 4.373     | 10415   | 792    | 0.265   |
| 2     | 5.537     | 3922625 | 389336 | 99.735  |
| Total |           | 3933040 | 390128 | 100.000 |

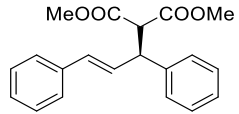

23

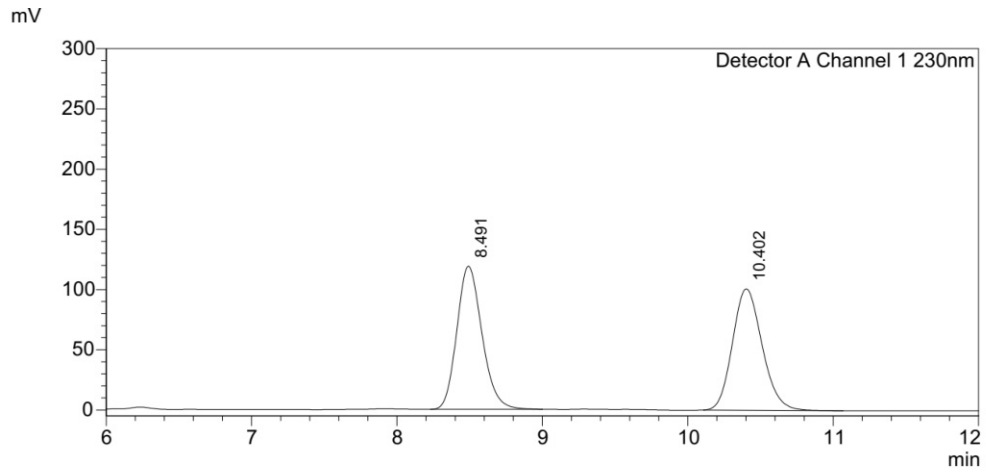

<Peak Table>

Detector A Channel 1 230nm

| Peak# | Ret. Time | Area    | Height | Area%   |
|-------|-----------|---------|--------|---------|
| 1     | 8.491     | 1428714 | 118962 | 49.948  |
| 2     | 10.402    | 1431688 | 100792 | 50.052  |
| Total |           | 2860402 | 219754 | 100.000 |

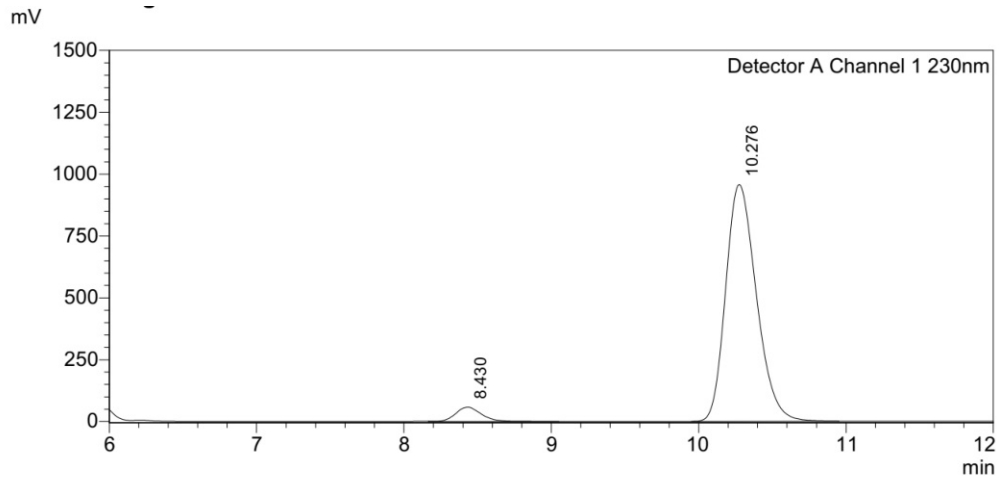

<Peak Table>

Detector A Channel 1 230nm

| Peak# | Ret. Time | Area     | Height  | Area%   |
|-------|-----------|----------|---------|---------|
| 1     | 8.430     | 696633   | 57782   | 4.781   |
| 2     | 10.276    | 13874595 | 957482  | 95.219  |
| Total |           | 14571229 | 1015263 | 100.000 |

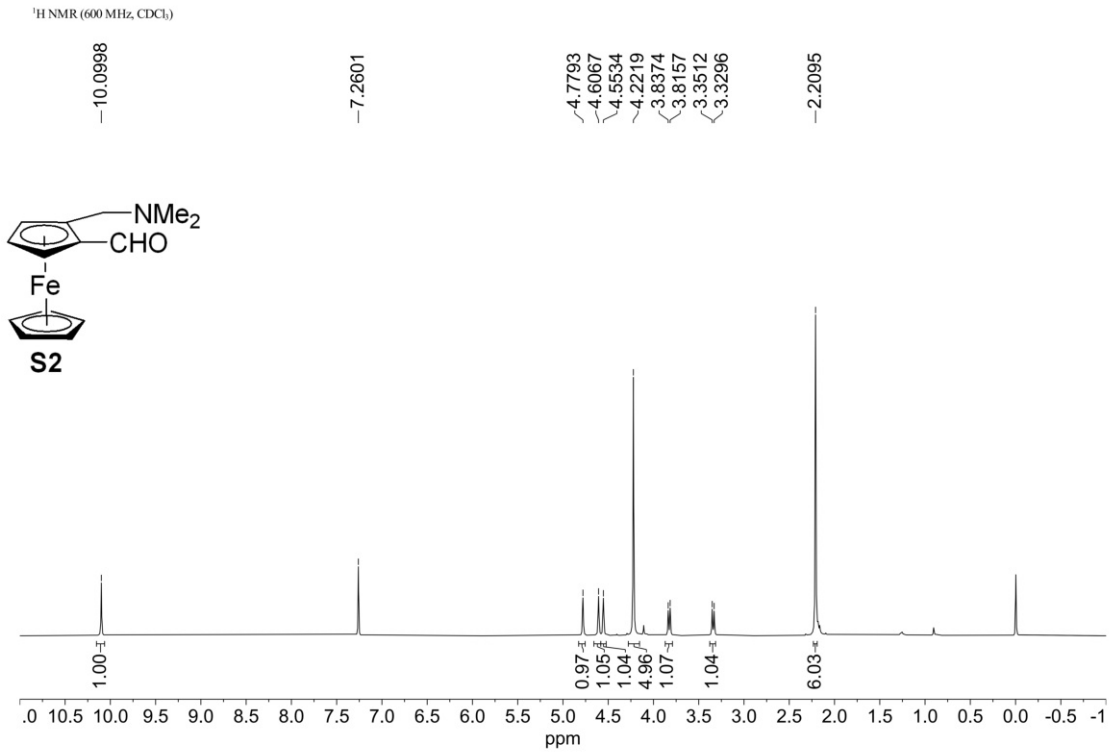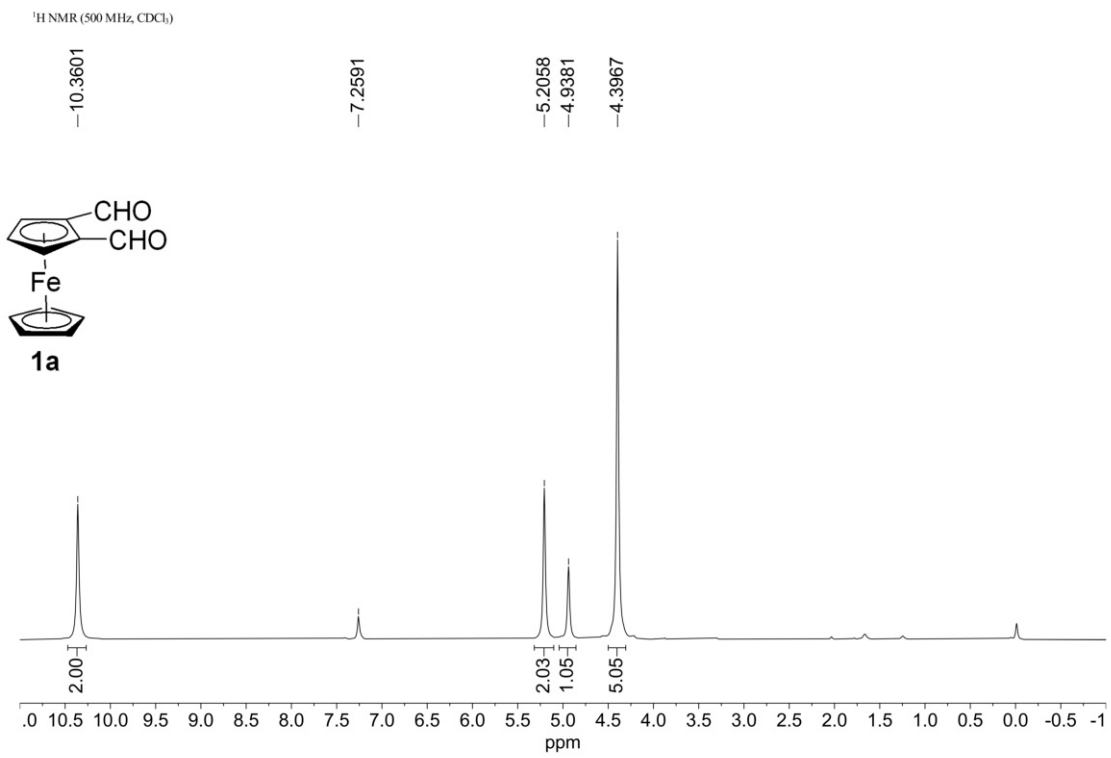

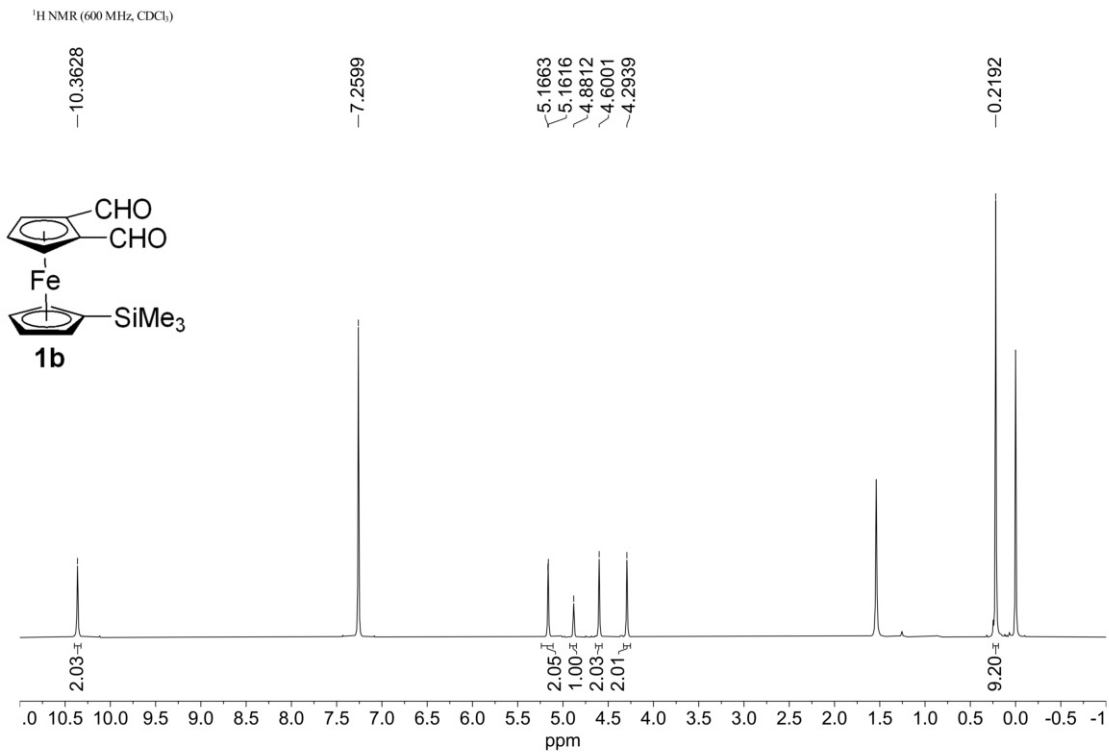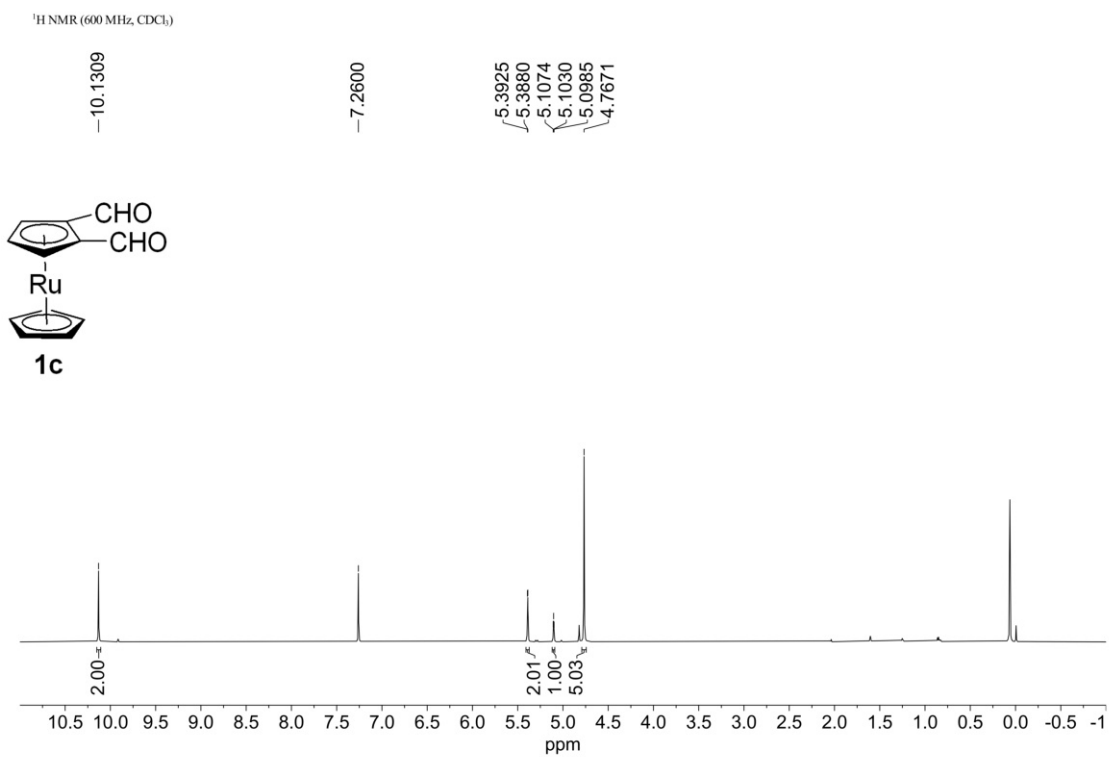

<sup>1</sup>H NMR (600 MHz, CDCl<sub>3</sub>)

10.0313

7.2599

5.6597

4.9522

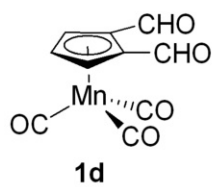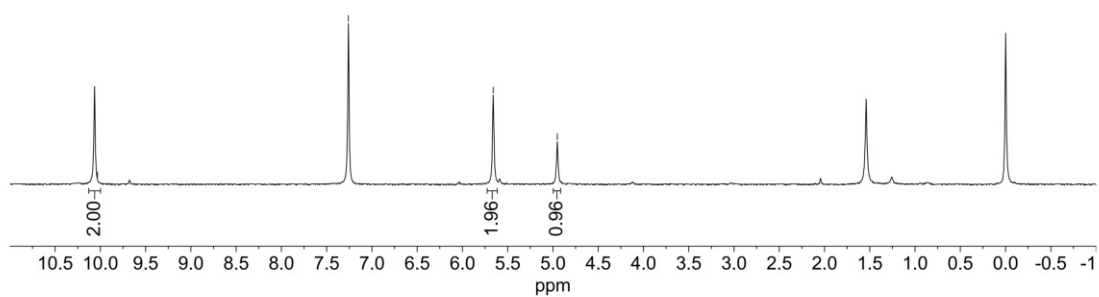

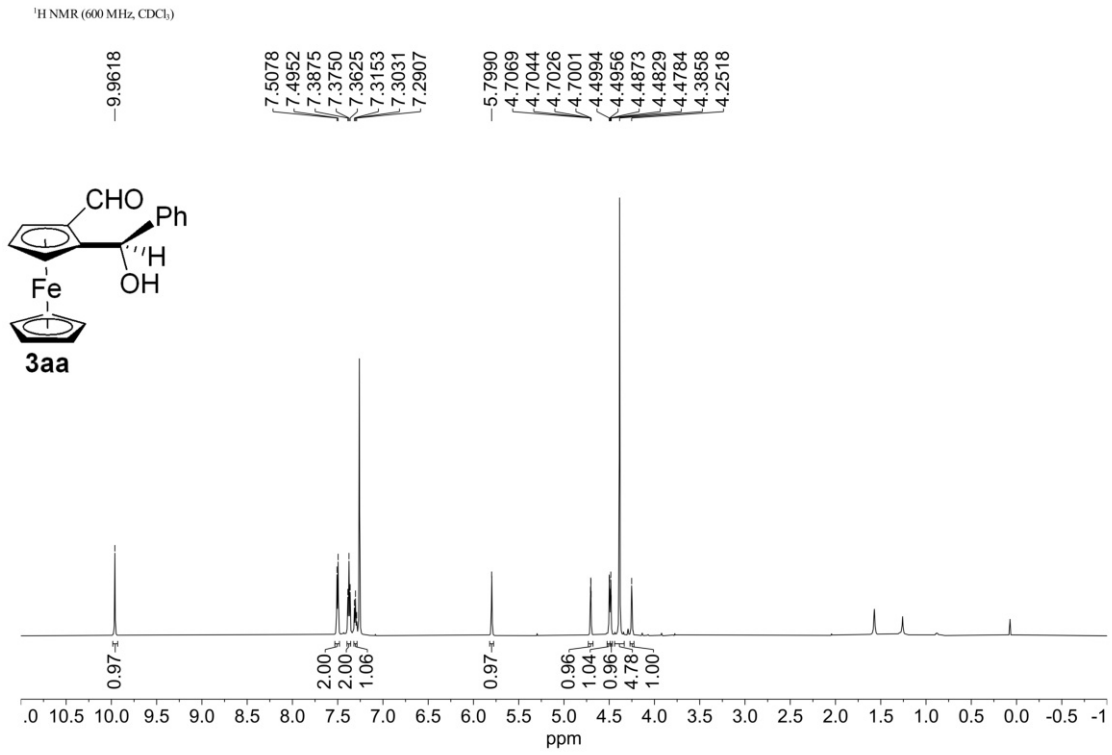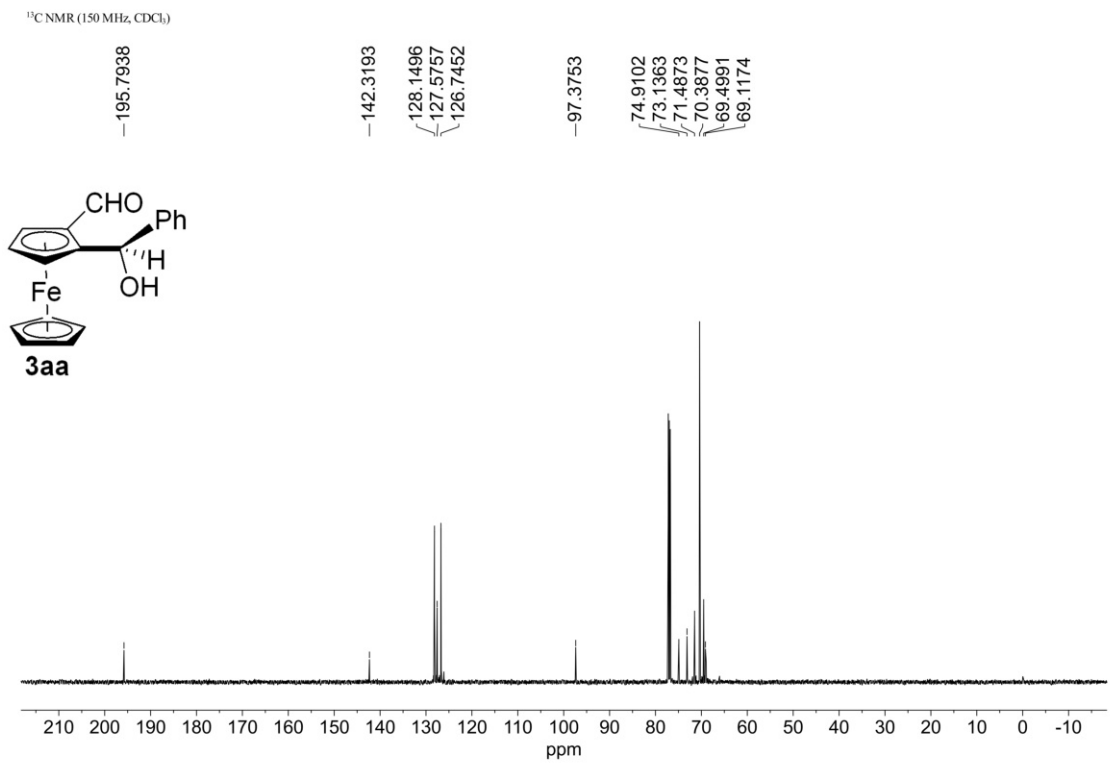

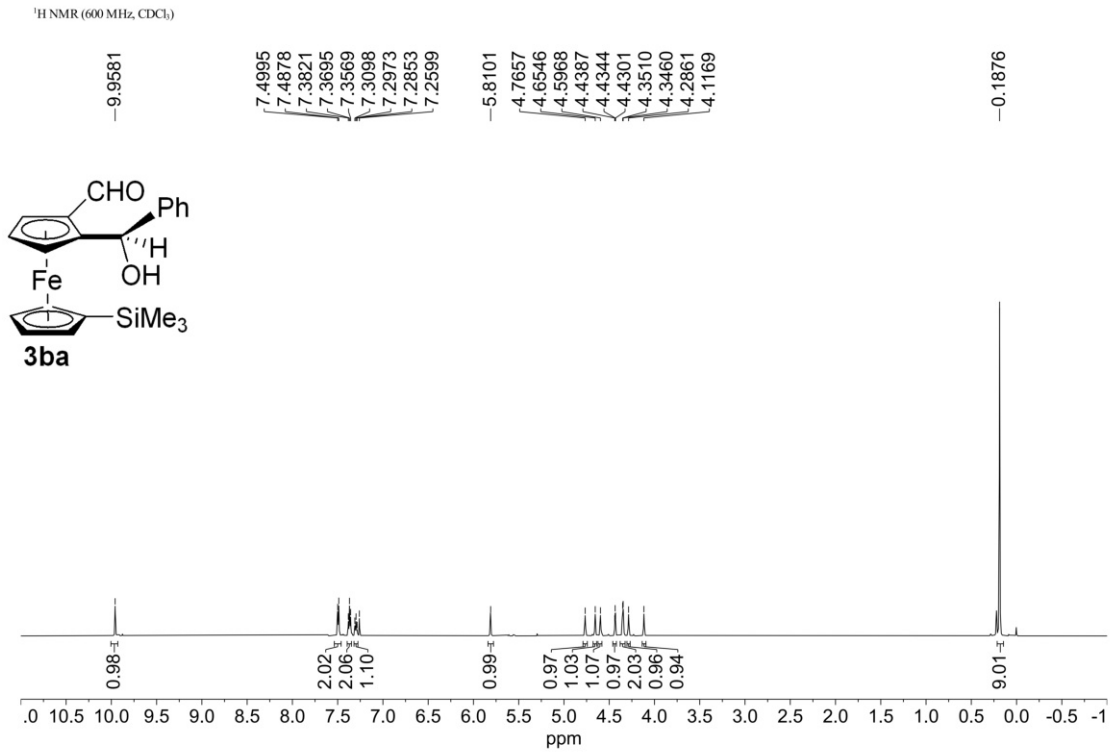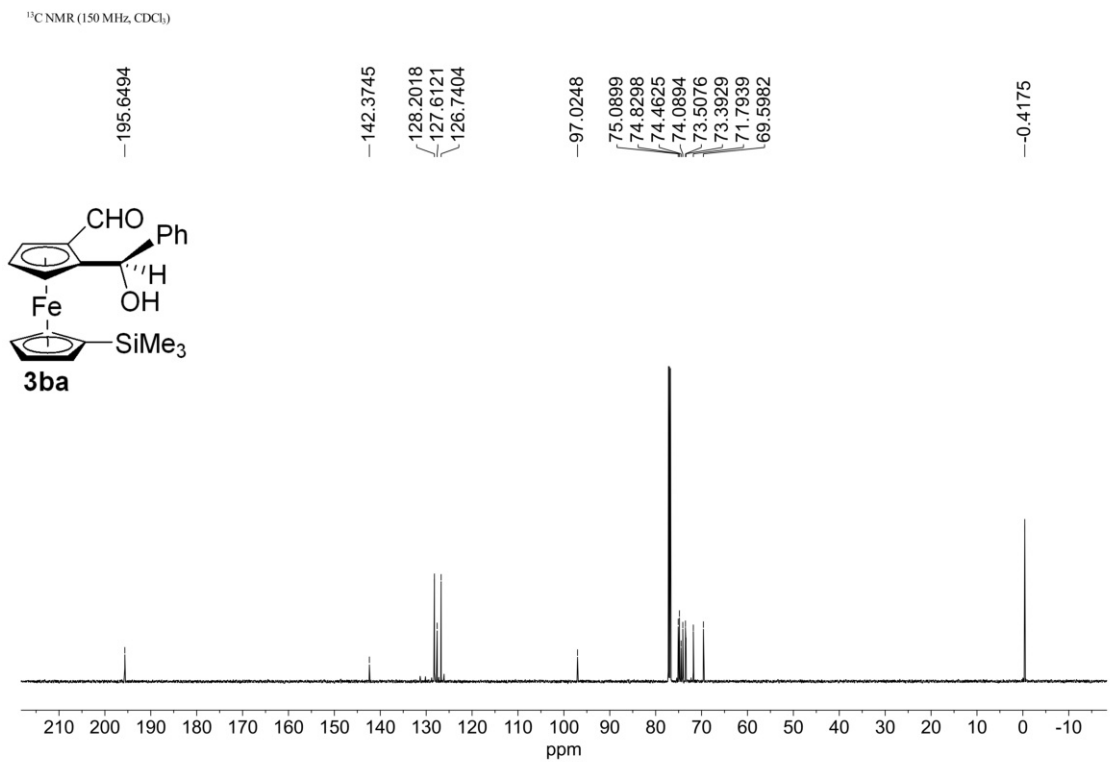

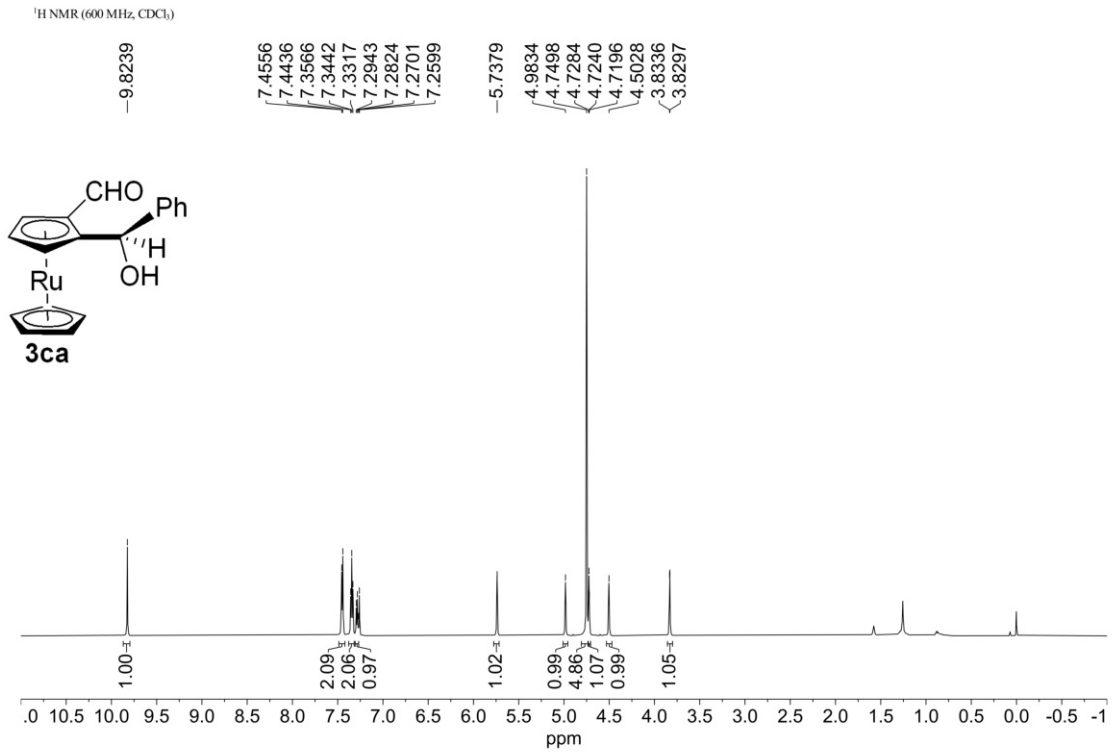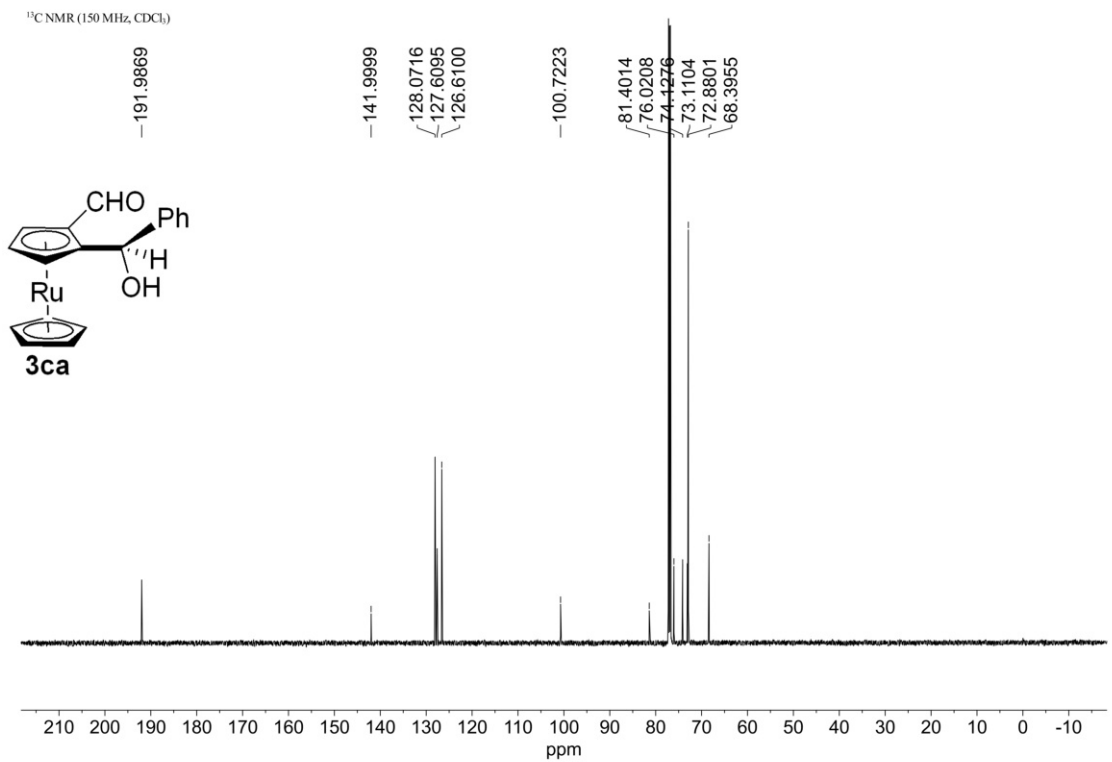



<sup>1</sup>H NMR (600 MHz, CDCl<sub>3</sub>)

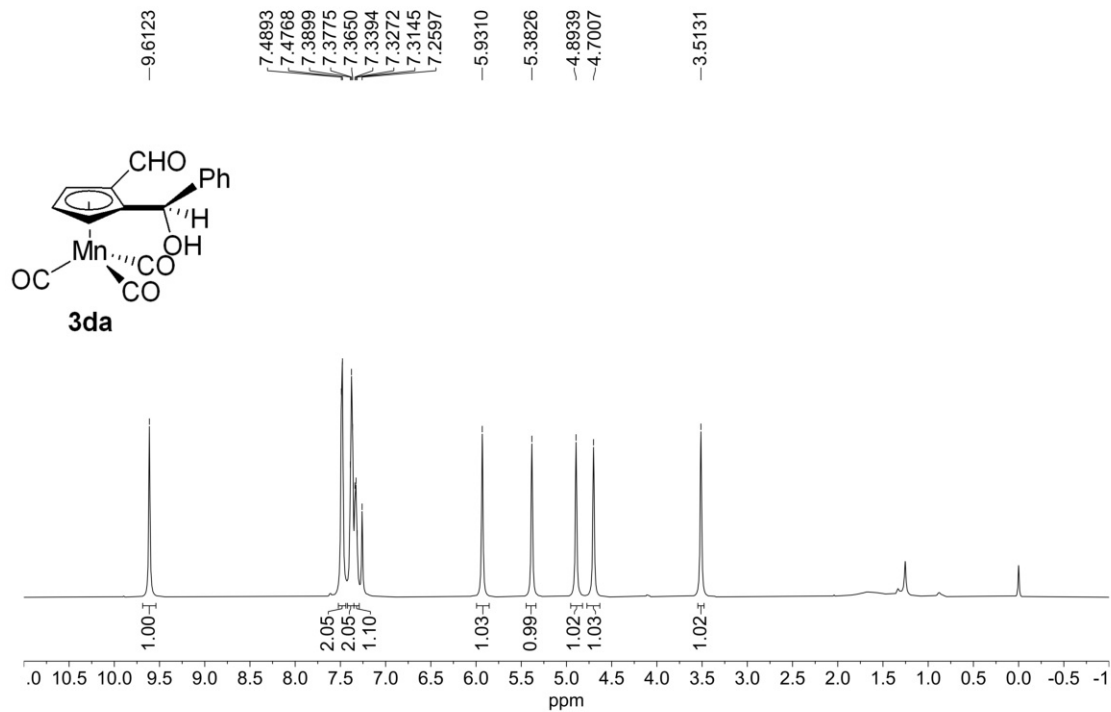

<sup>13</sup>C NMR (150 MHz, CDCl<sub>3</sub>)

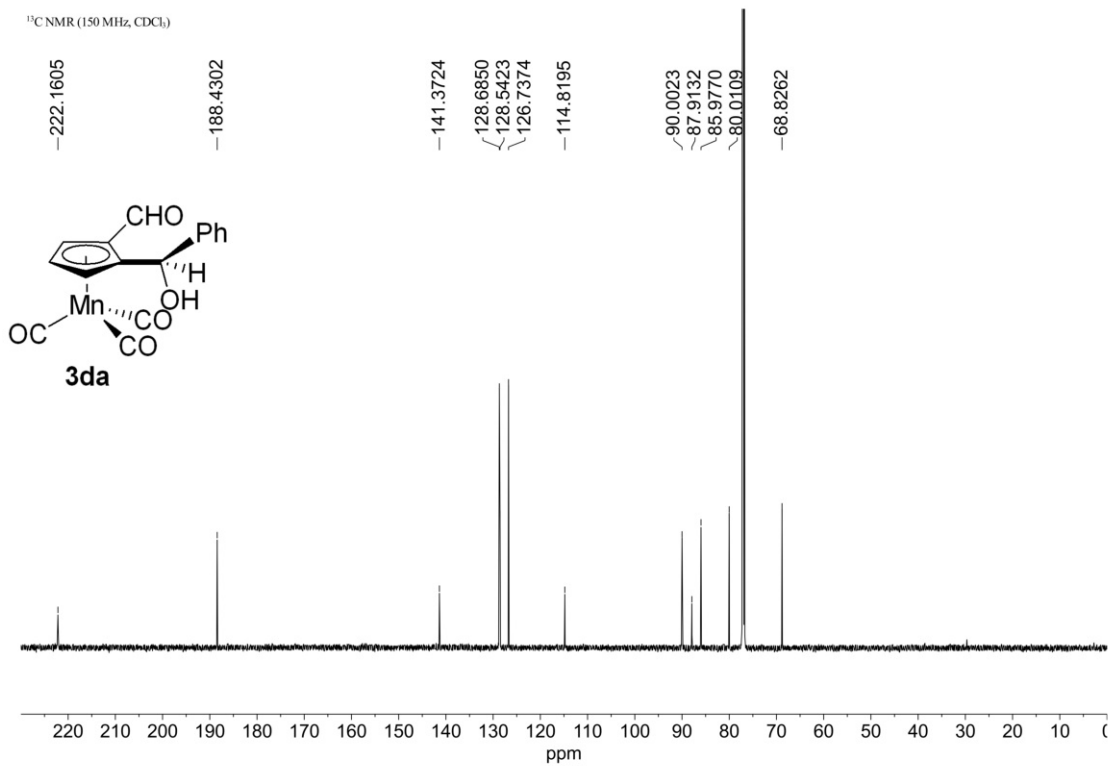

<sup>1</sup>H NMR (600 MHz, CDCl<sub>3</sub>)

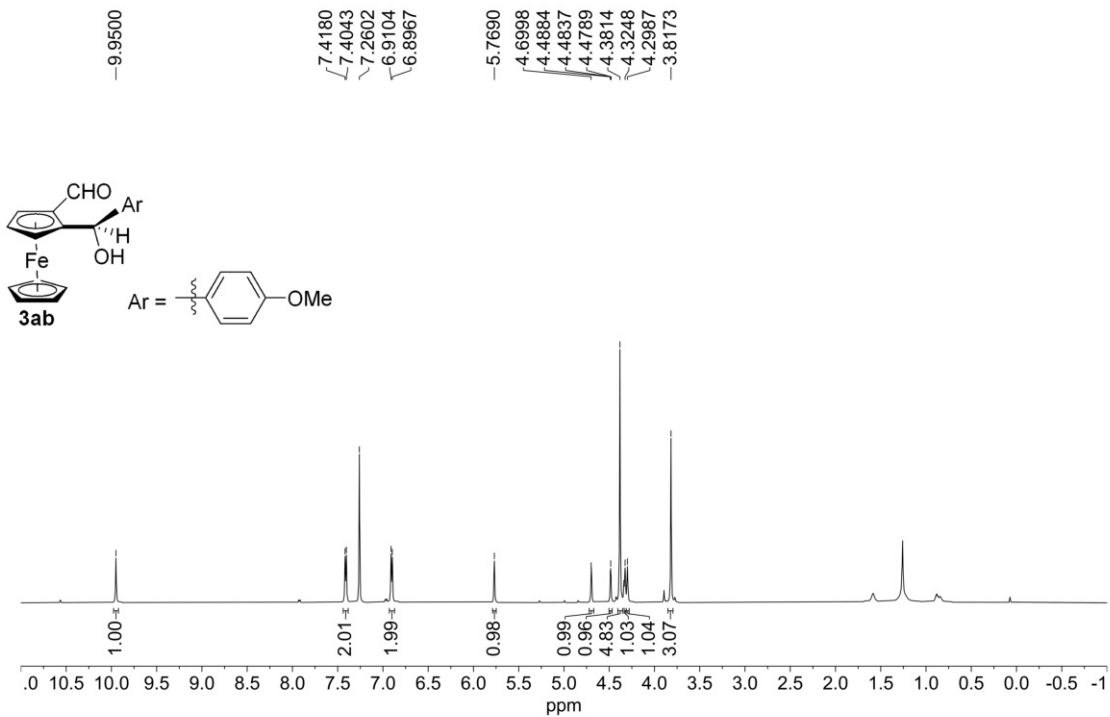

<sup>13</sup>C NMR (150 MHz, CDCl<sub>3</sub>)

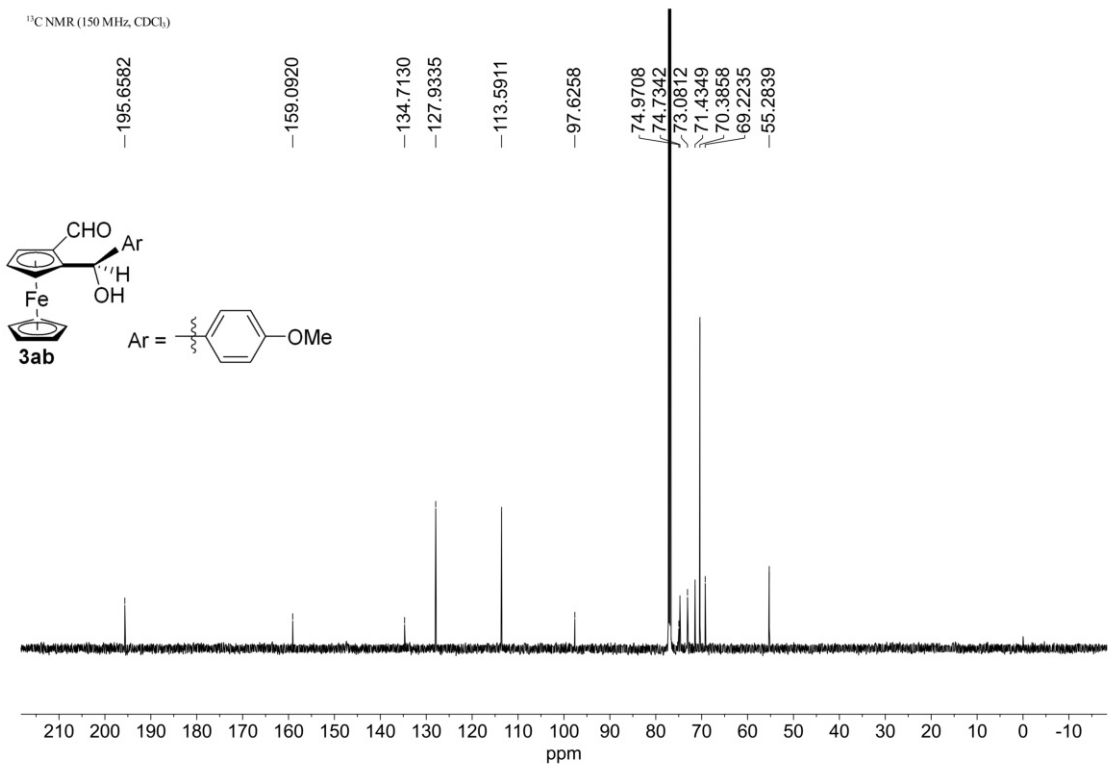

<sup>1</sup>H NMR (600 MHz, CDCl<sub>3</sub>)

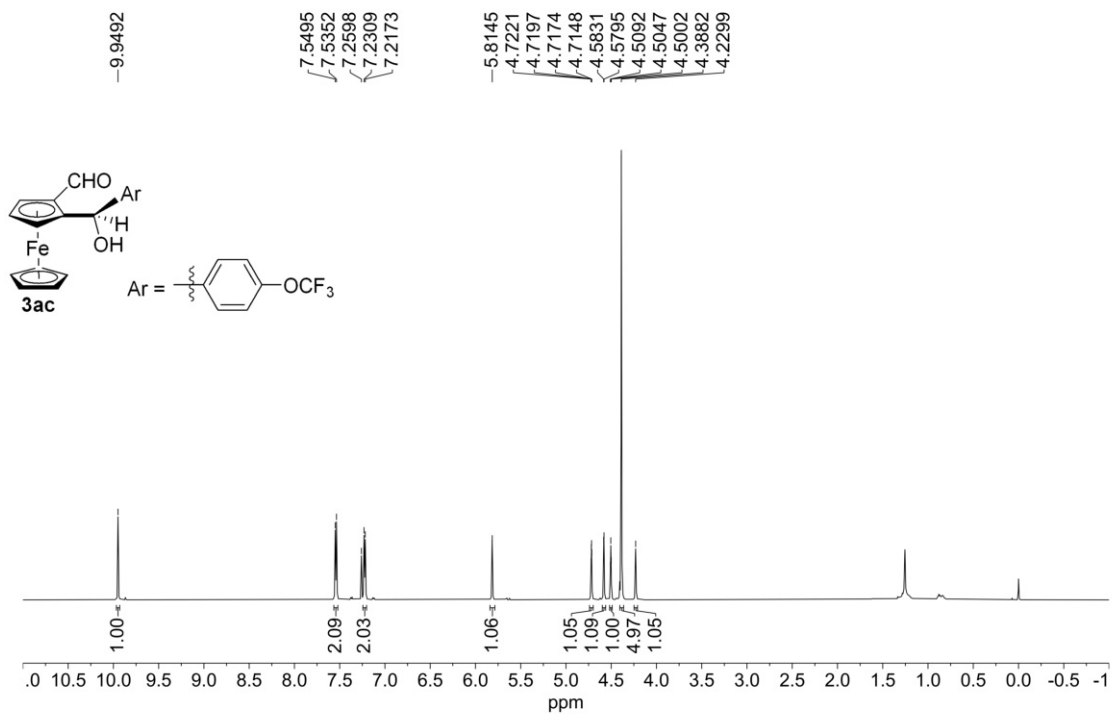

<sup>13</sup>C NMR (150 MHz, CDCl<sub>3</sub>)

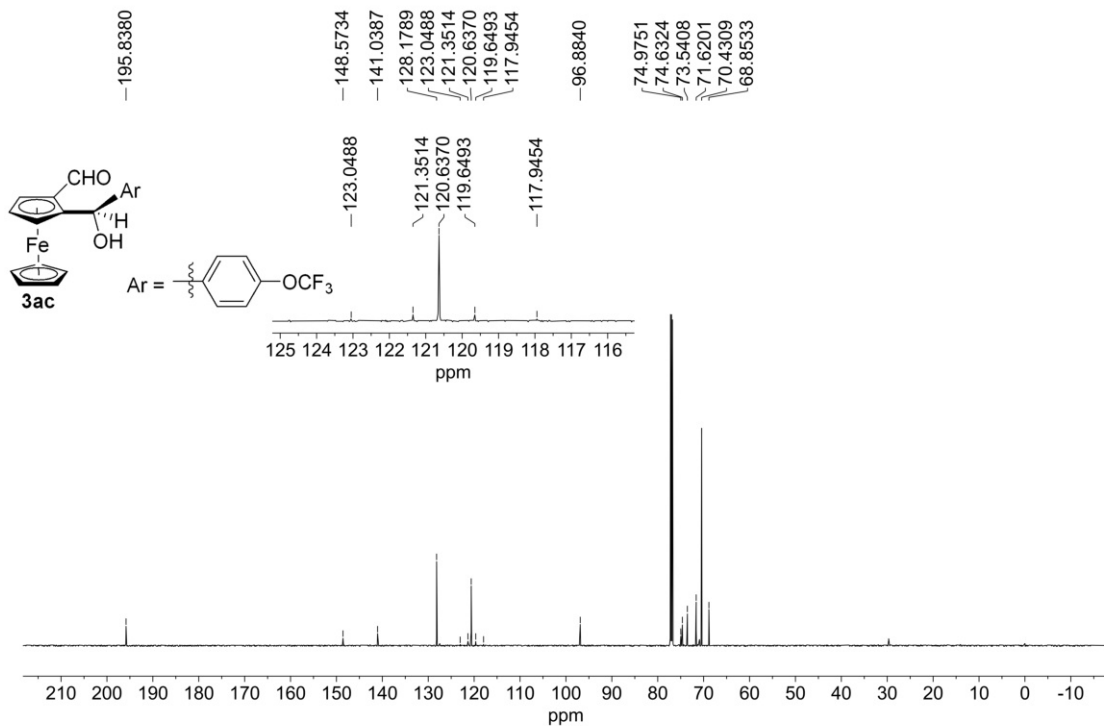

<sup>1</sup>H NMR (600 MHz, CDCl<sub>3</sub>)

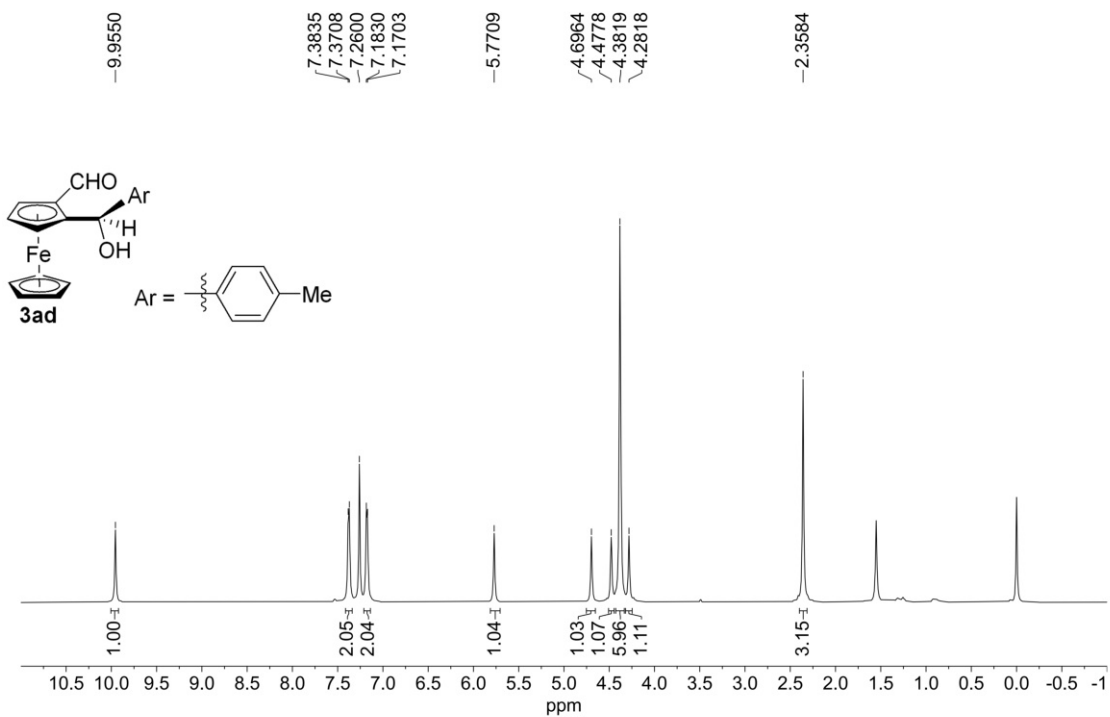

<sup>13</sup>C NMR (150 MHz, CDCl<sub>3</sub>)

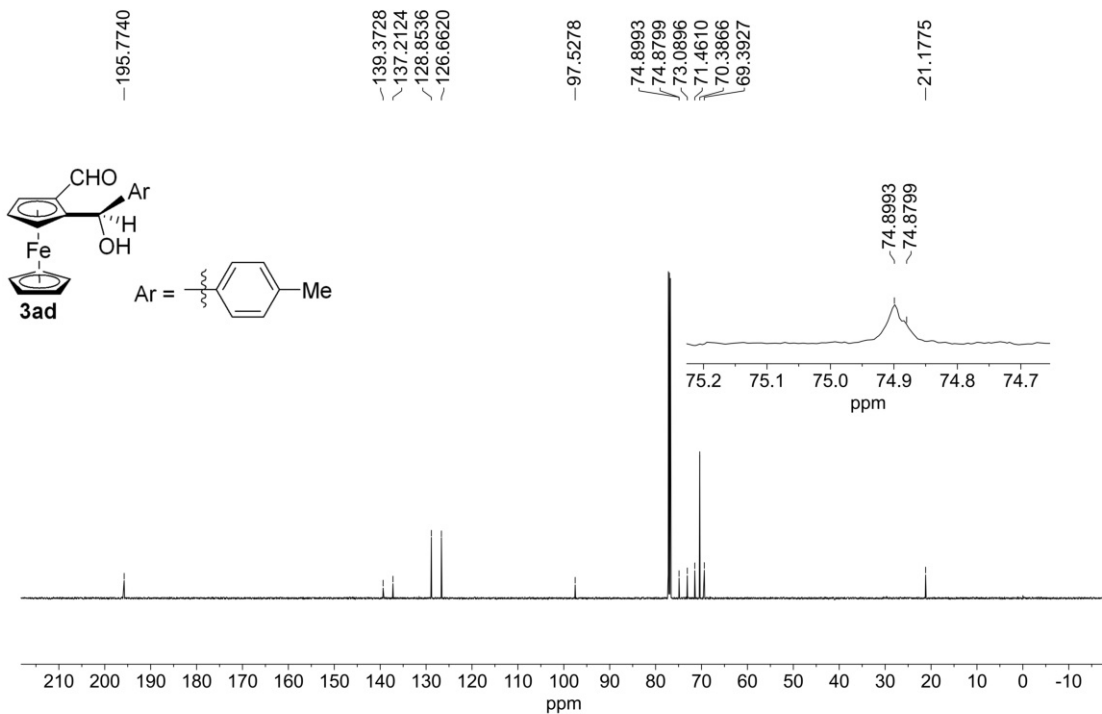

<sup>1</sup>H NMR (600 MHz, CDCl<sub>3</sub>)

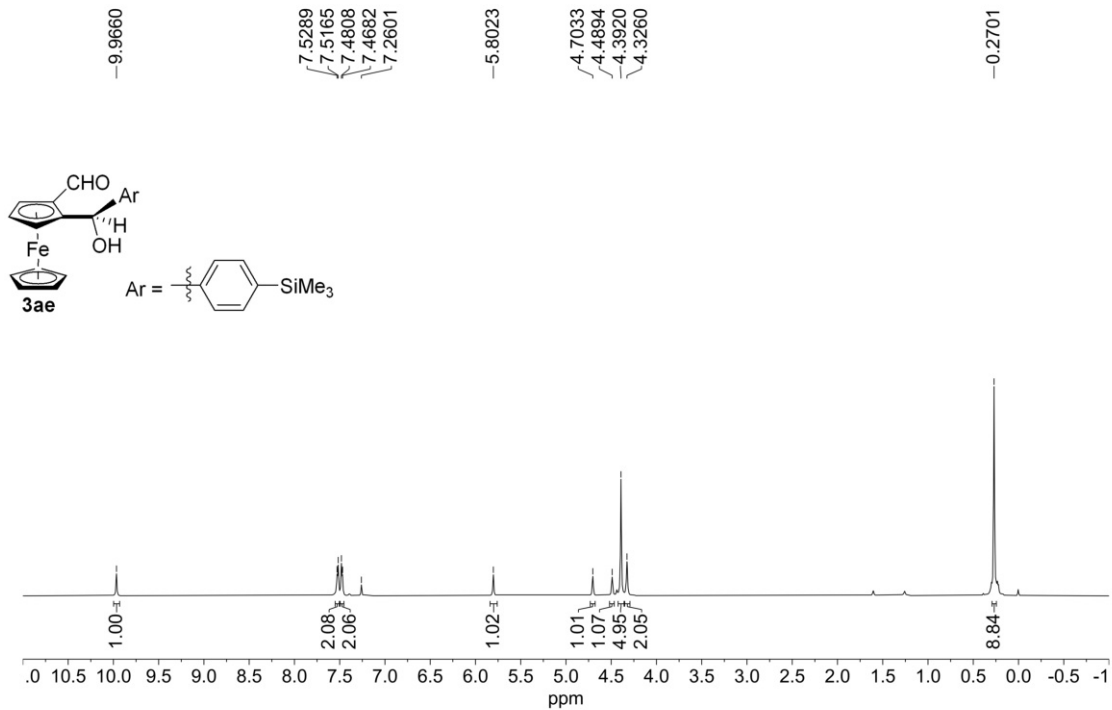

<sup>13</sup>C NMR (150 MHz, CDCl<sub>3</sub>)

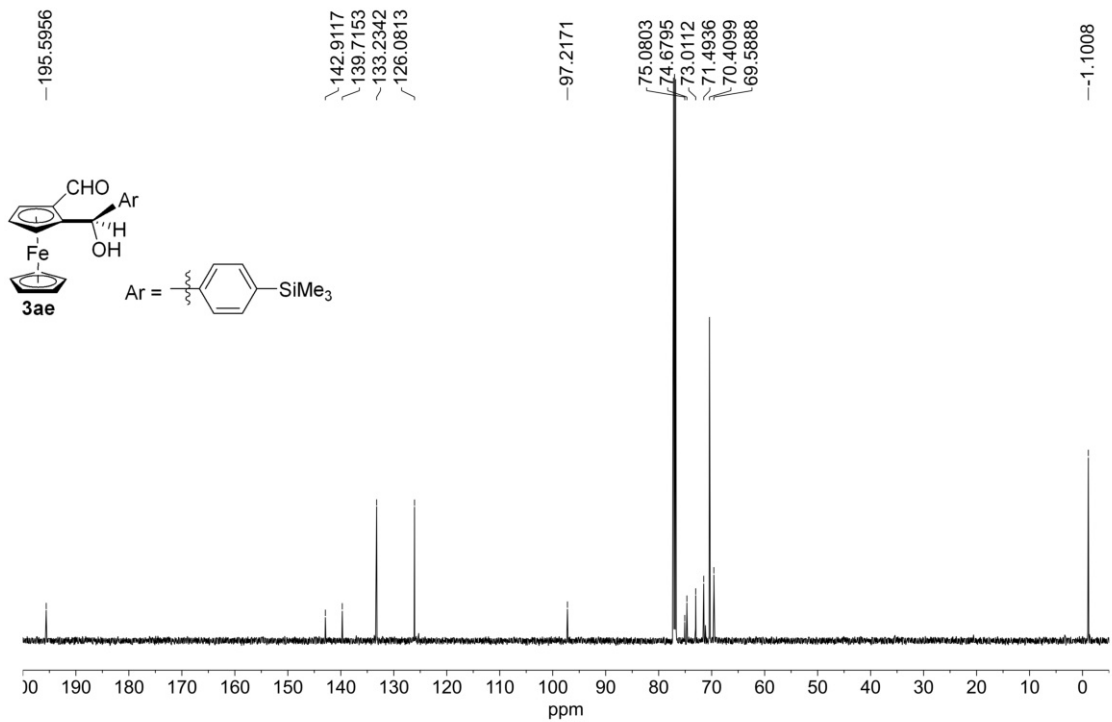

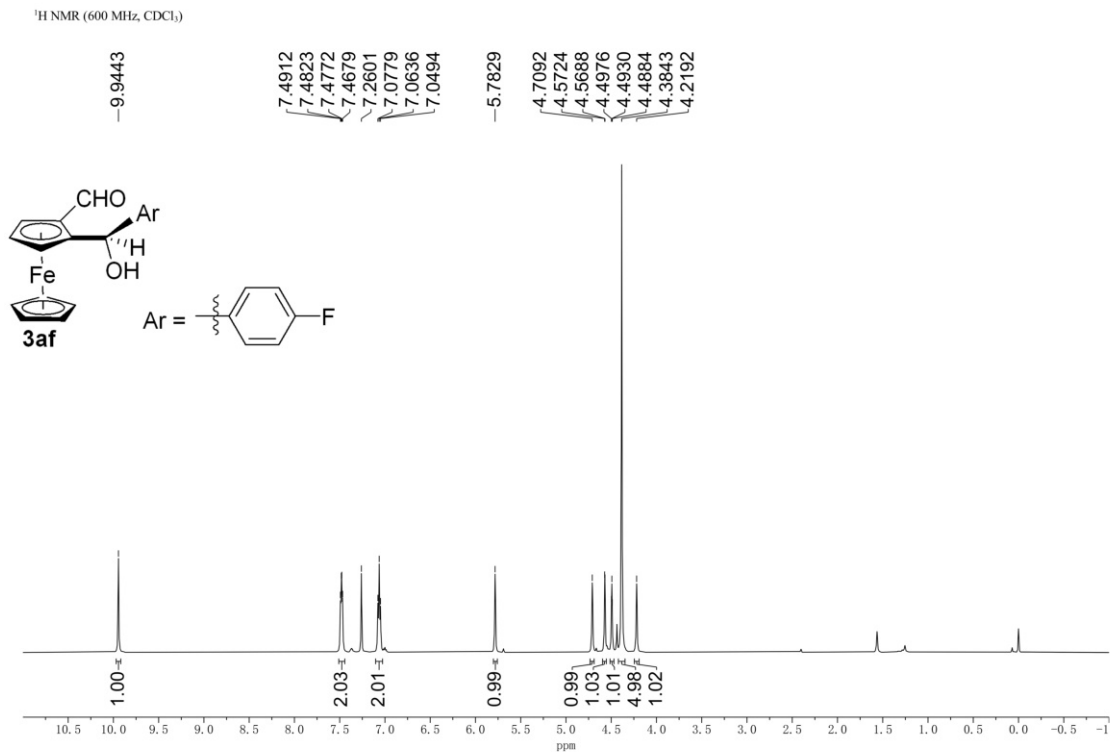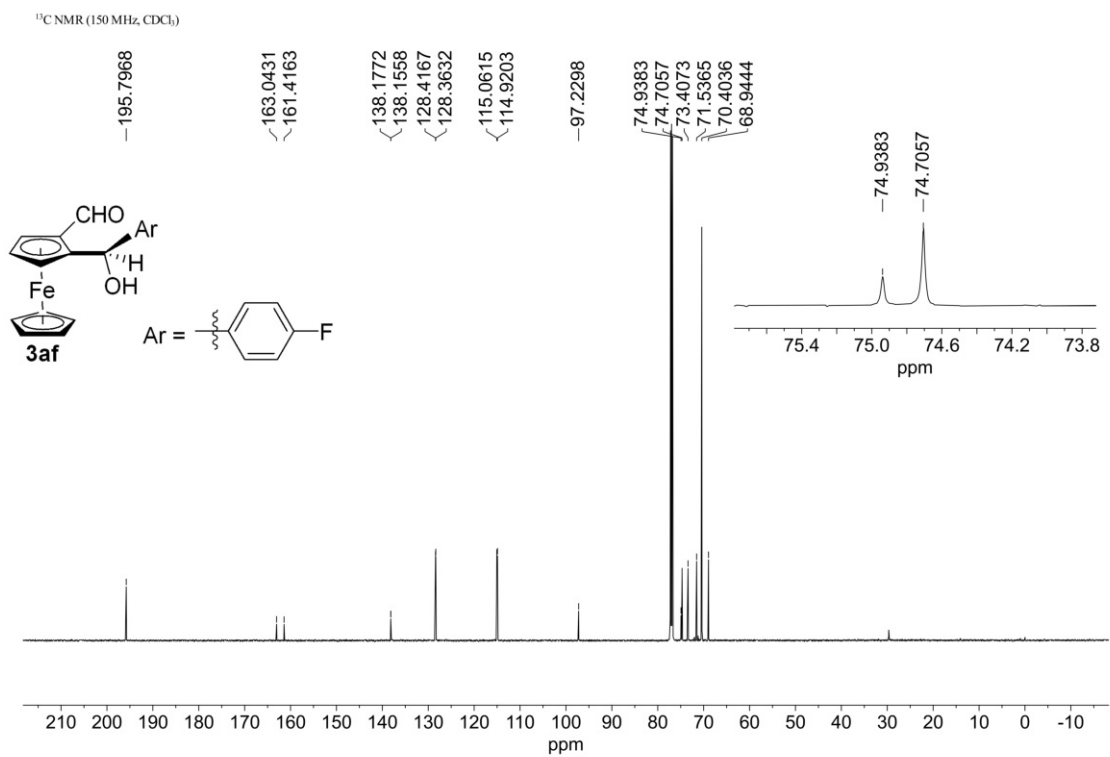

<sup>1</sup>H NMR (600 MHz, CDCl<sub>3</sub>)

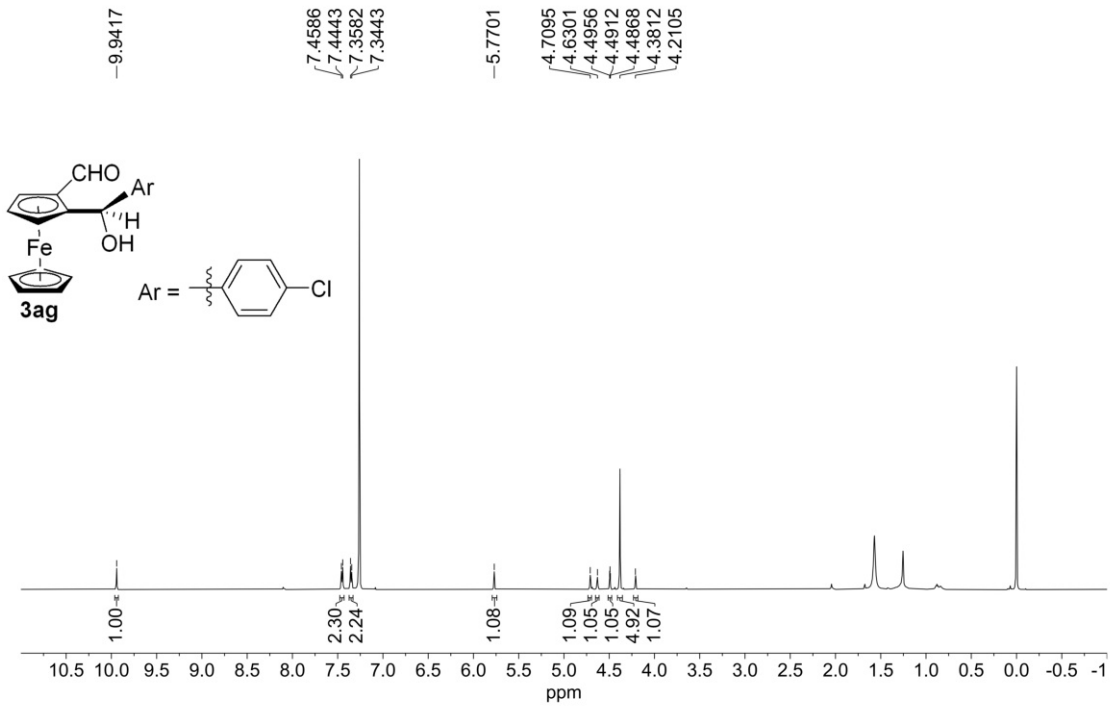

<sup>13</sup>C NMR (150 MHz, CDCl<sub>3</sub>)

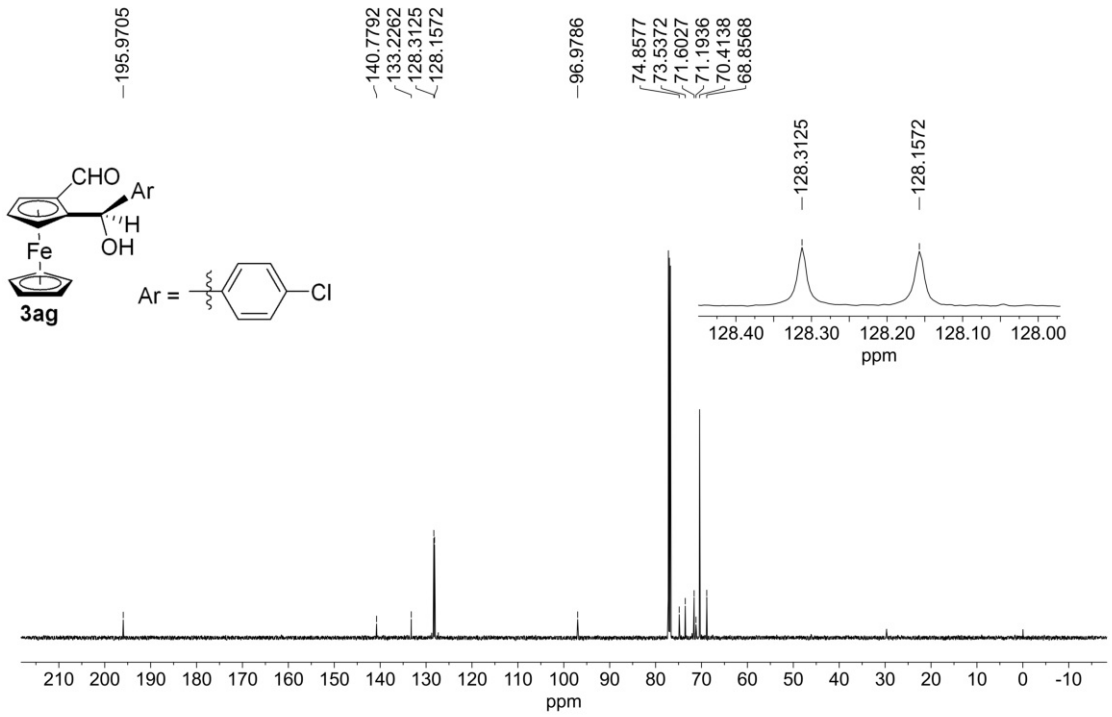

<sup>1</sup>H NMR (600 MHz, CDCl<sub>3</sub>)

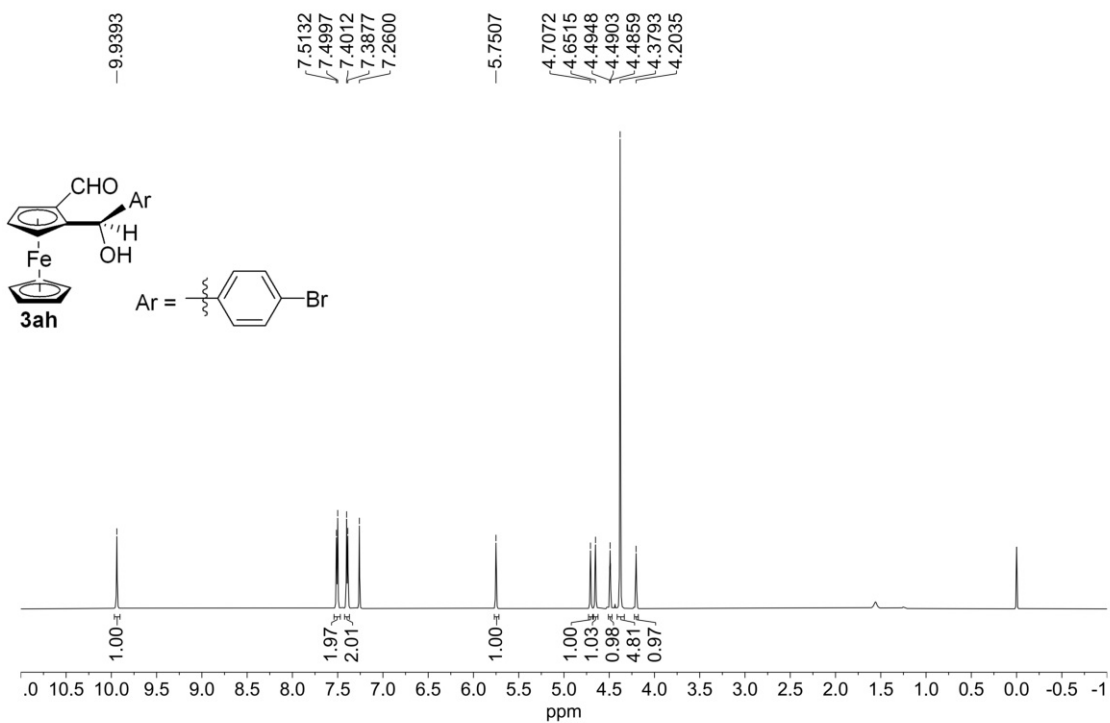

<sup>13</sup>C NMR (150 MHz, CDCl<sub>3</sub>)

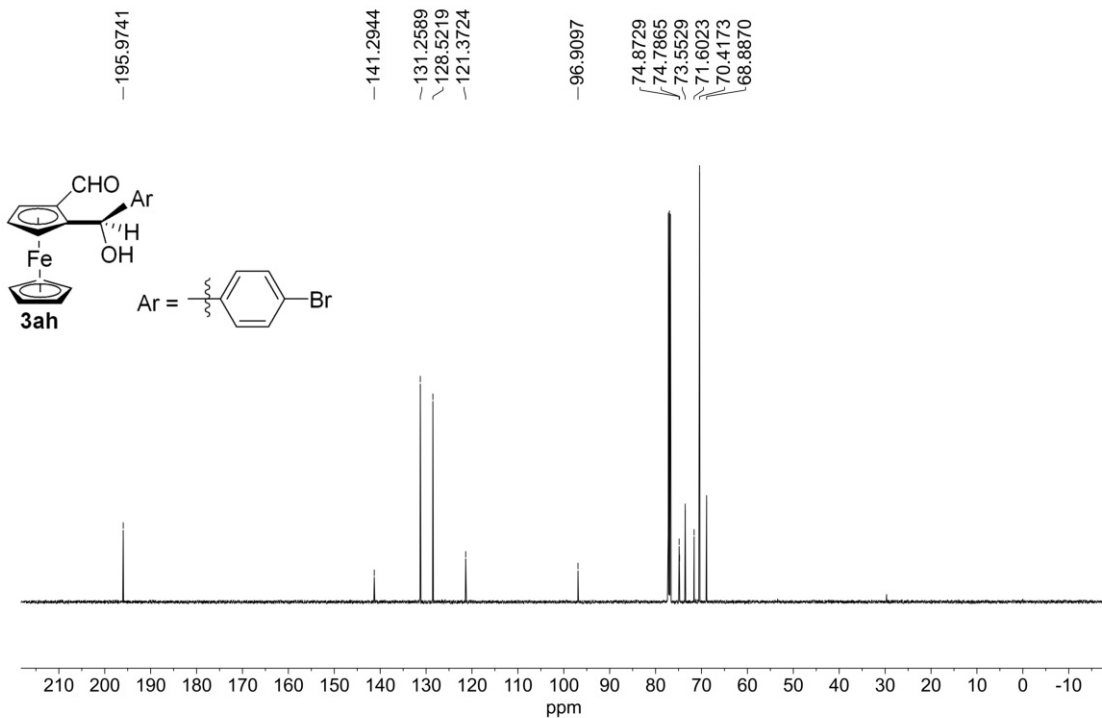



<sup>1</sup>H NMR (600 MHz, CDCl<sub>3</sub>)

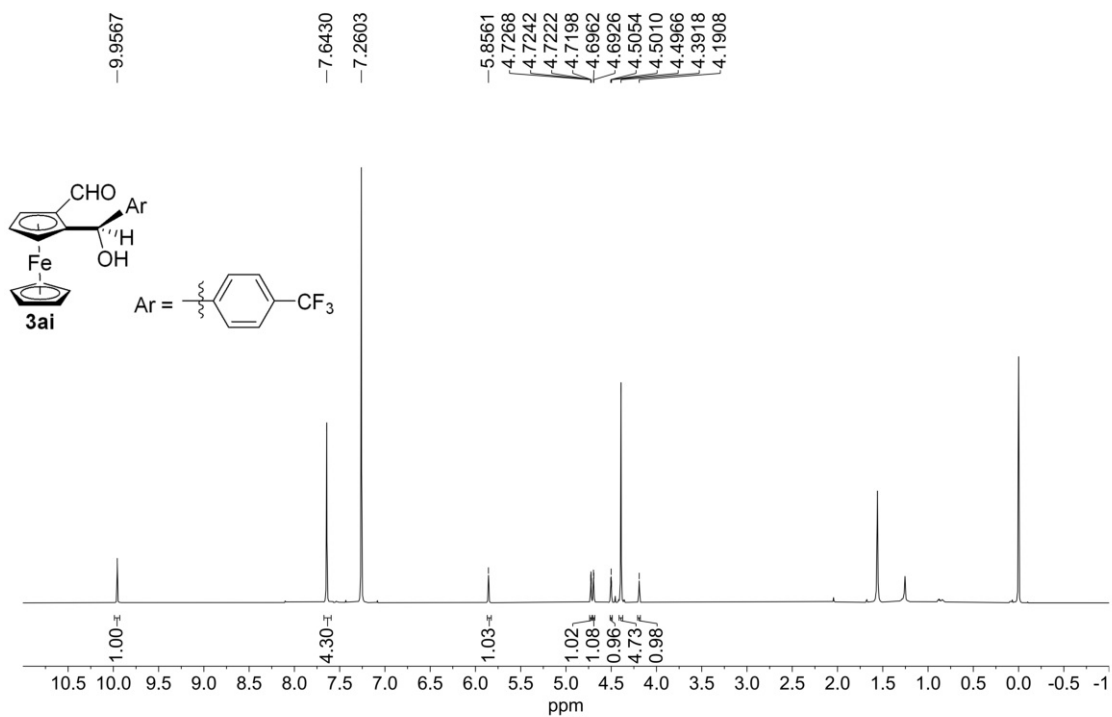

<sup>13</sup>C NMR (150 MHz, CDCl<sub>3</sub>)

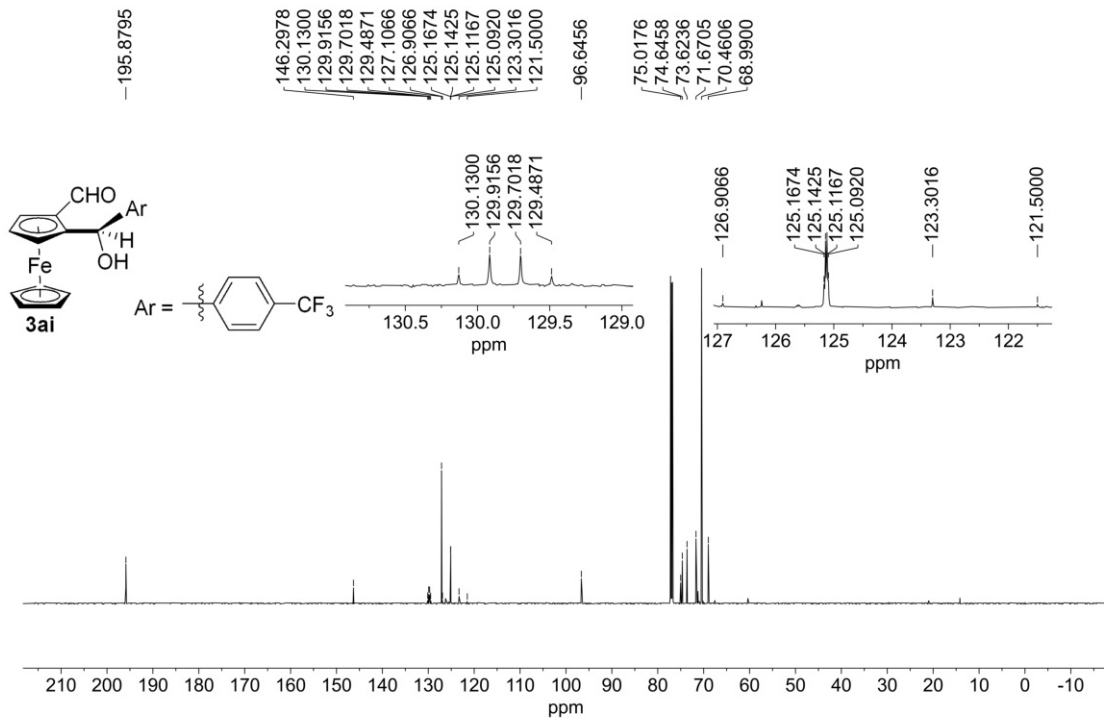

<sup>1</sup>H NMR (600 MHz, CDCl<sub>3</sub>)

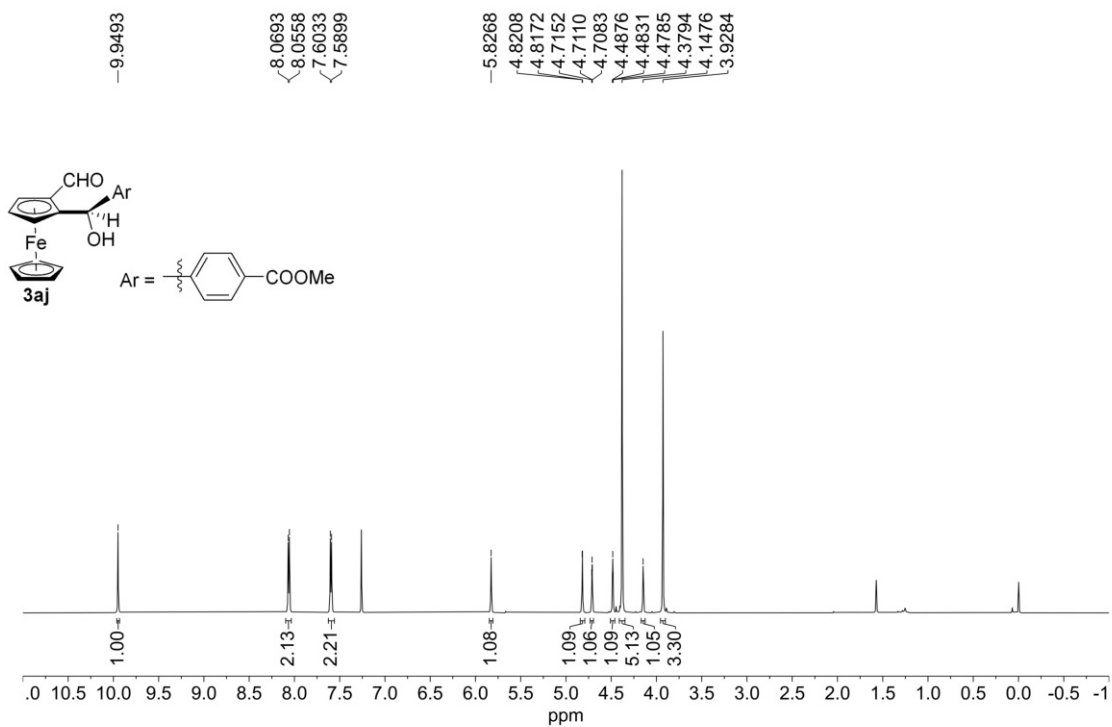

<sup>13</sup>C NMR (150 MHz, CDCl<sub>3</sub>)

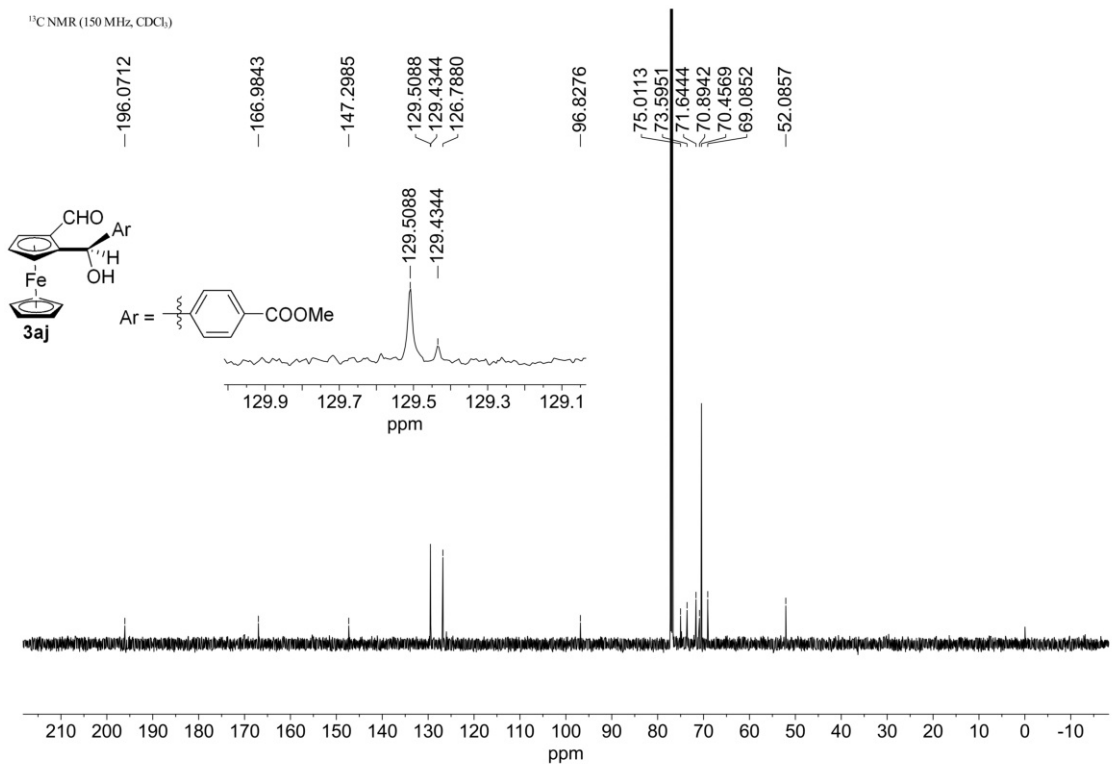

<sup>1</sup>H NMR (600 MHz, CDCl<sub>3</sub>)

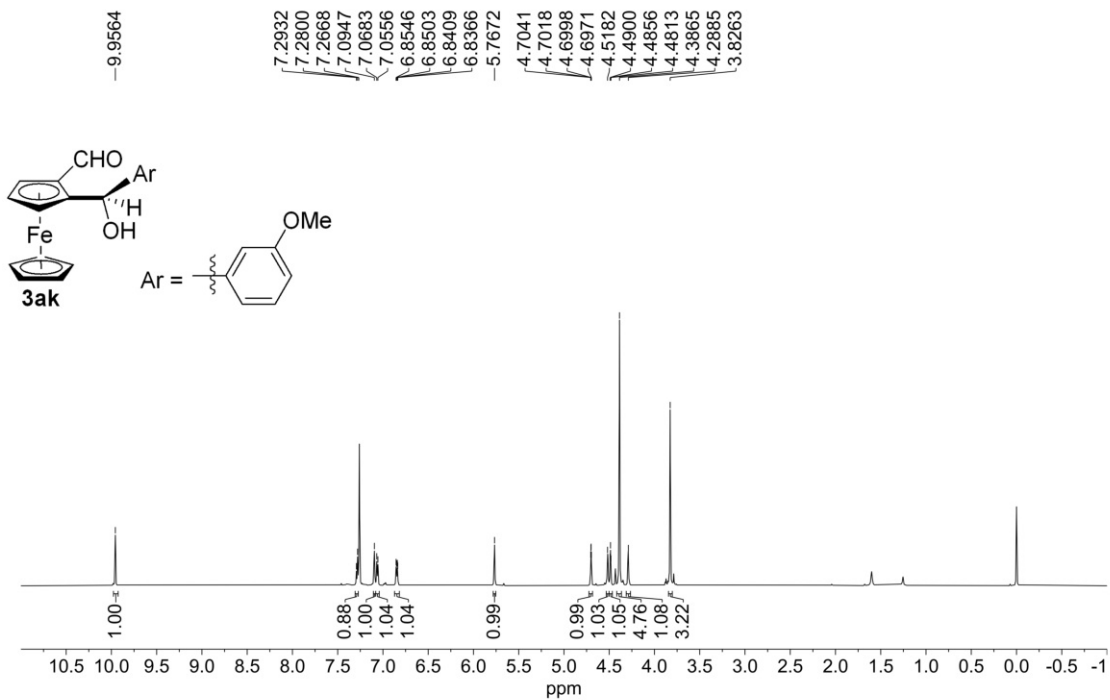

<sup>13</sup>C NMR (150 MHz, CDCl<sub>3</sub>)

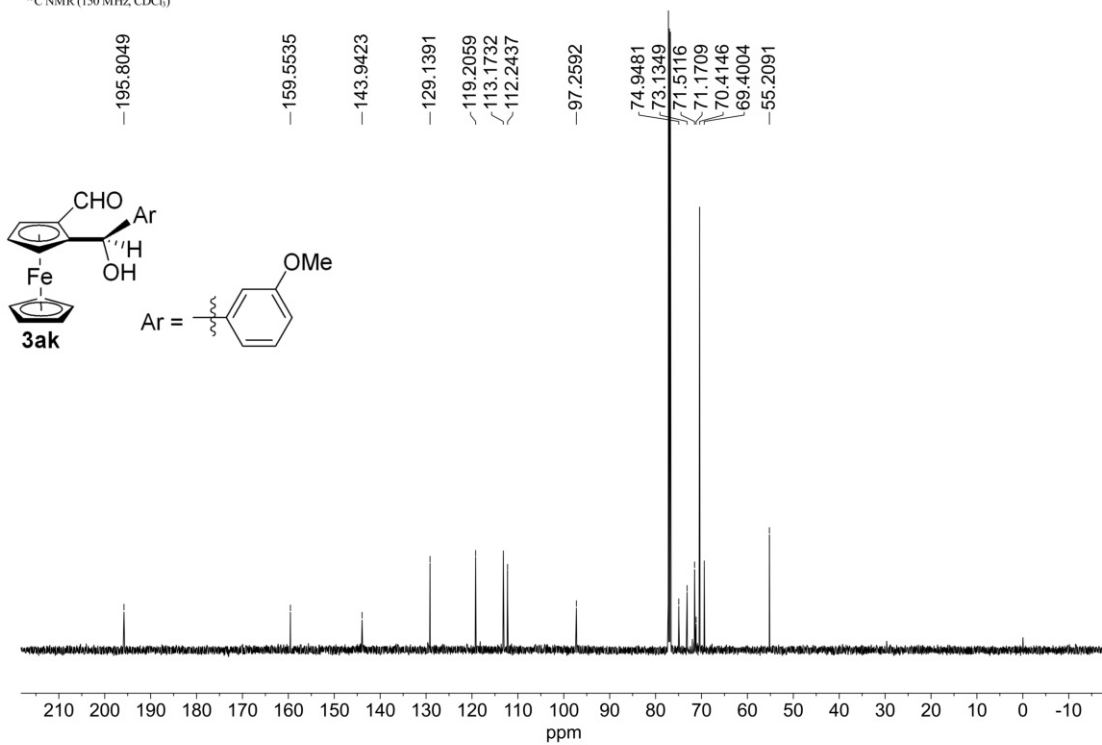

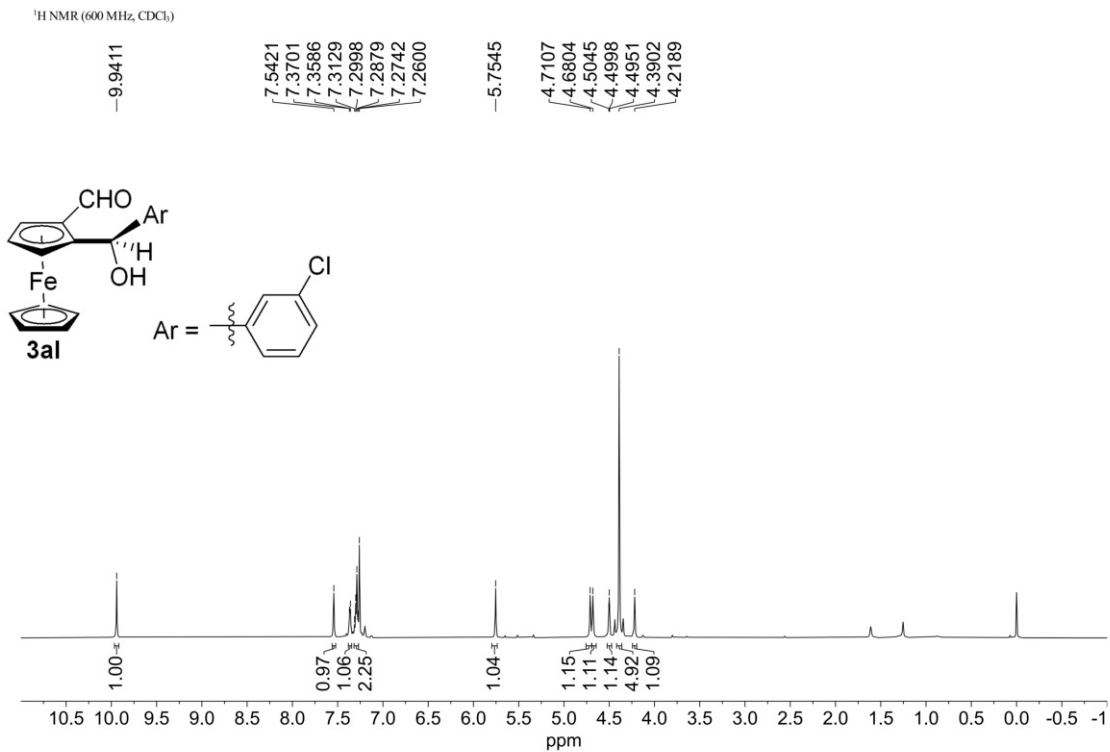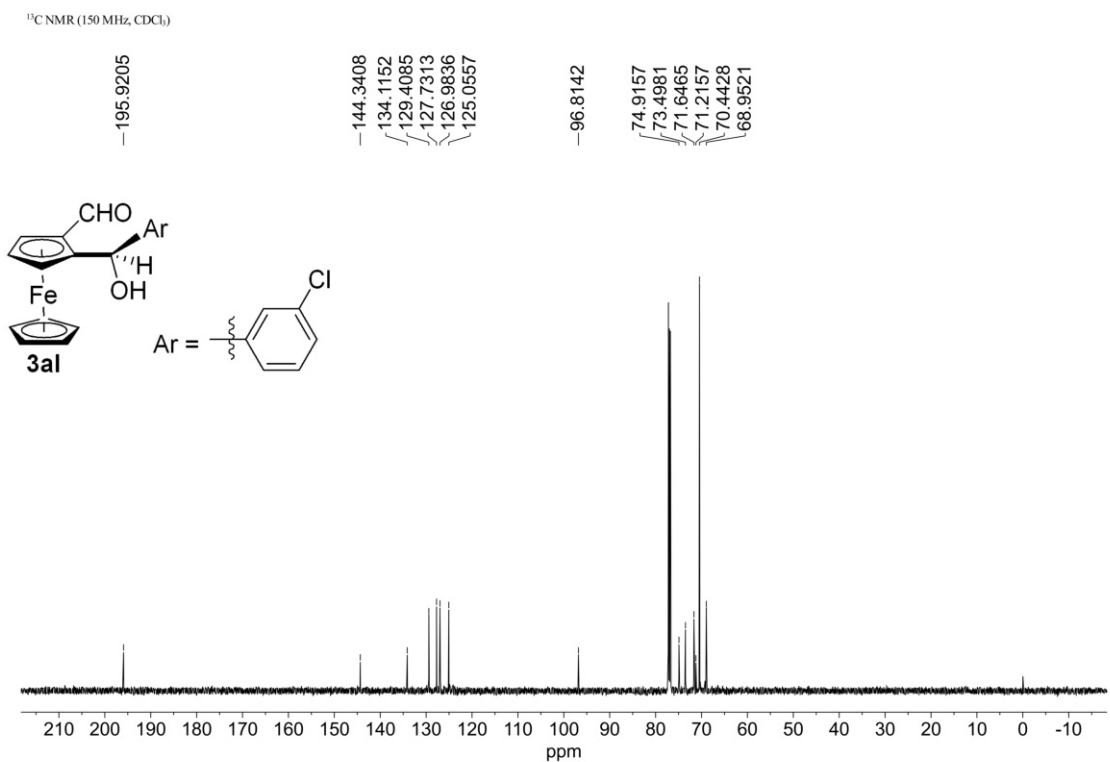



<sup>1</sup>H NMR (600 MHz, CDCl<sub>3</sub>)

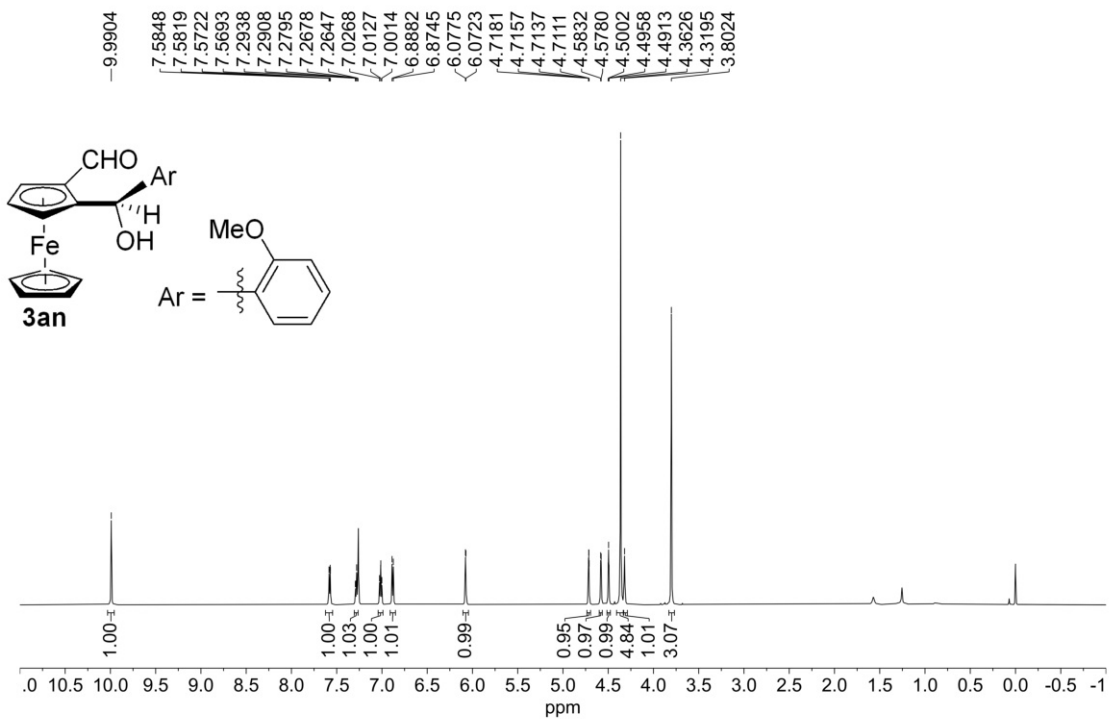

<sup>13</sup>C NMR (150 MHz, CDCl<sub>3</sub>)

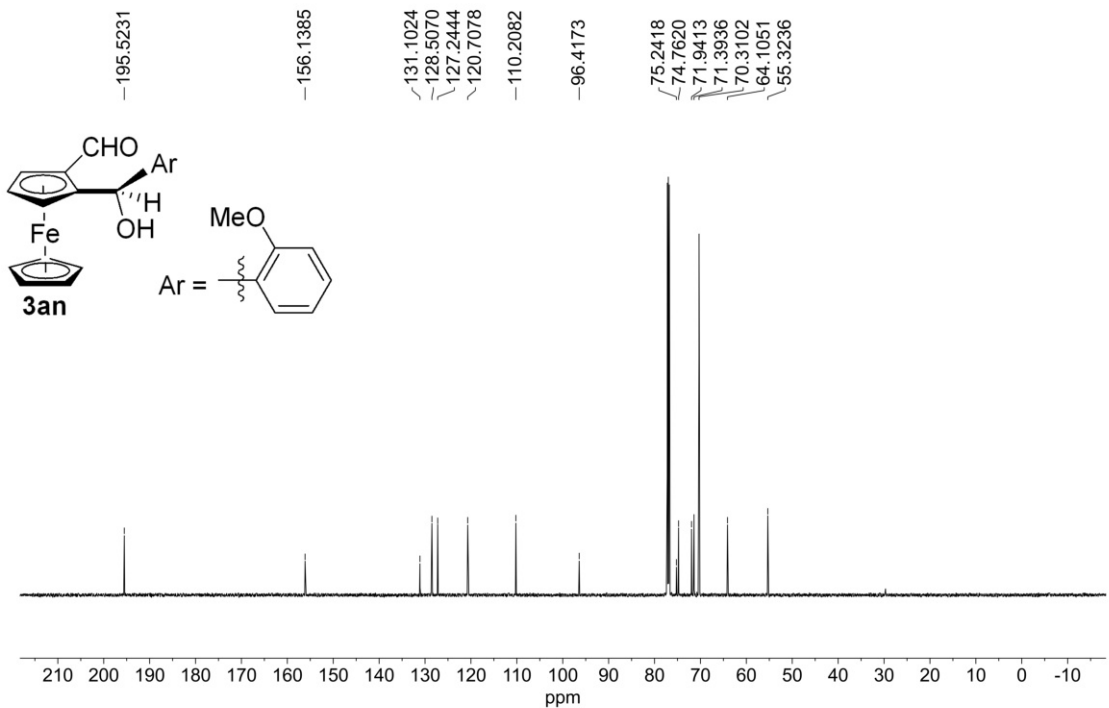

<sup>1</sup>H NMR (600 MHz, CDCl<sub>3</sub>)

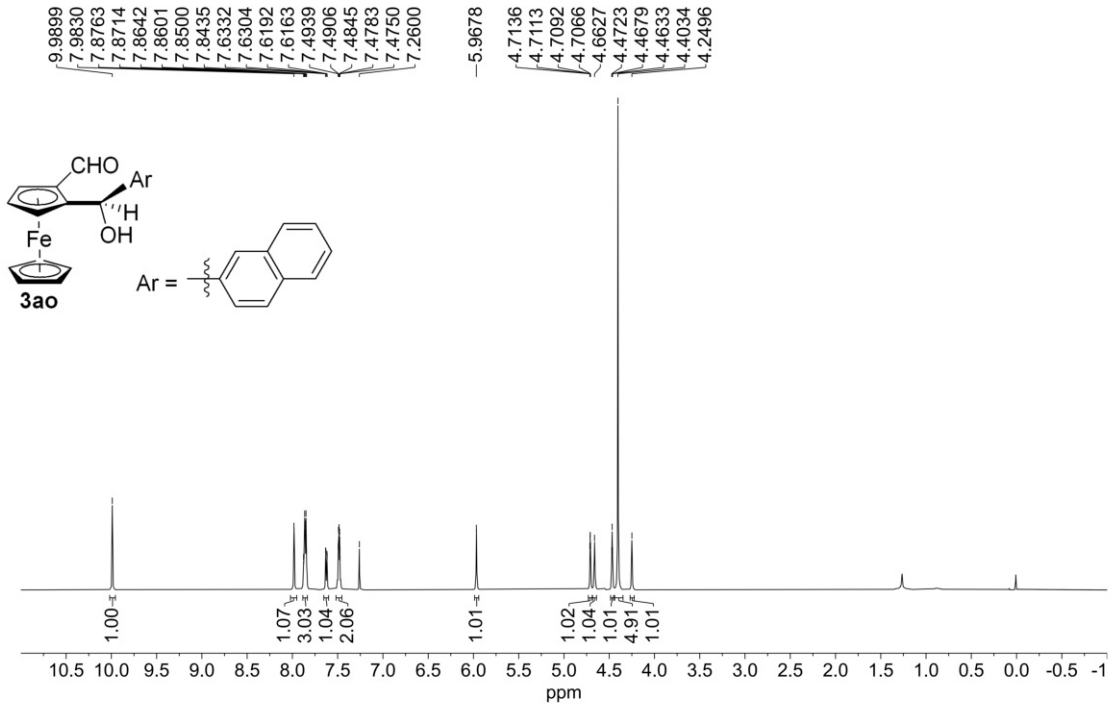

<sup>13</sup>C NMR (150 MHz, CDCl<sub>3</sub>)

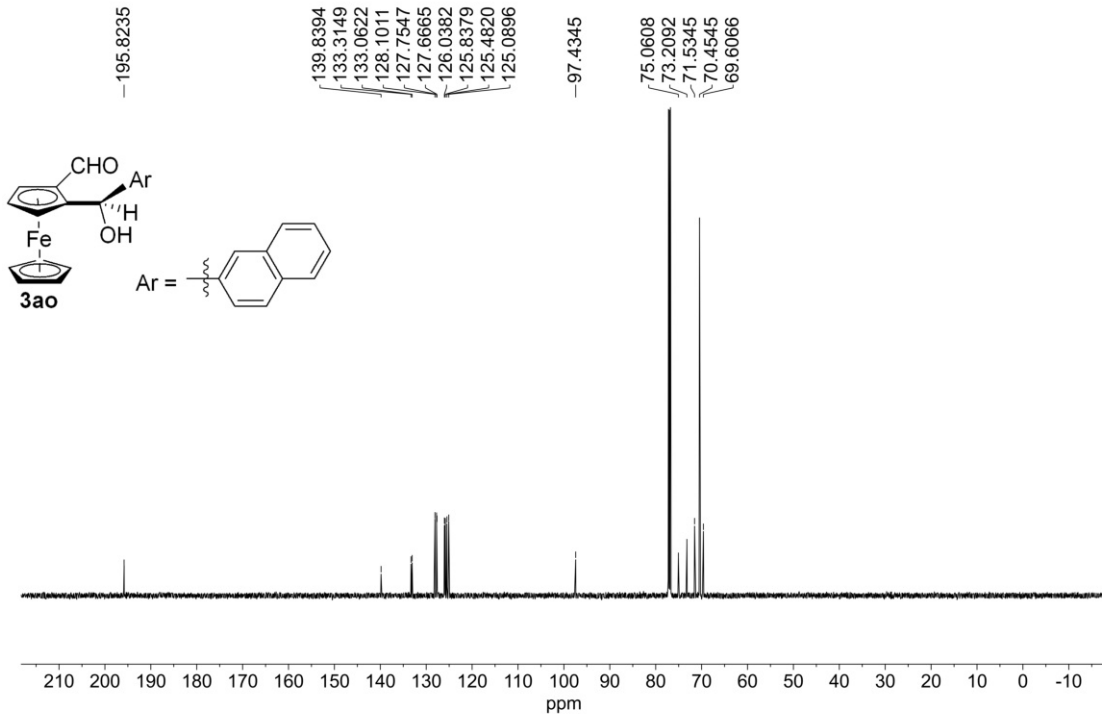

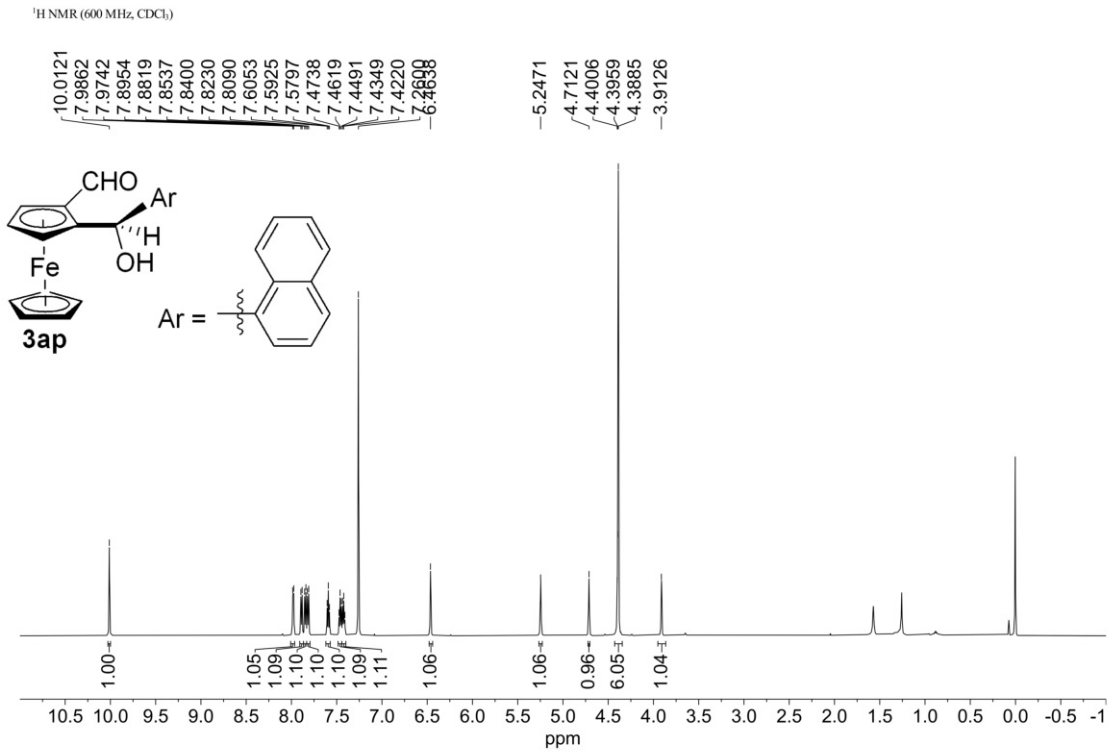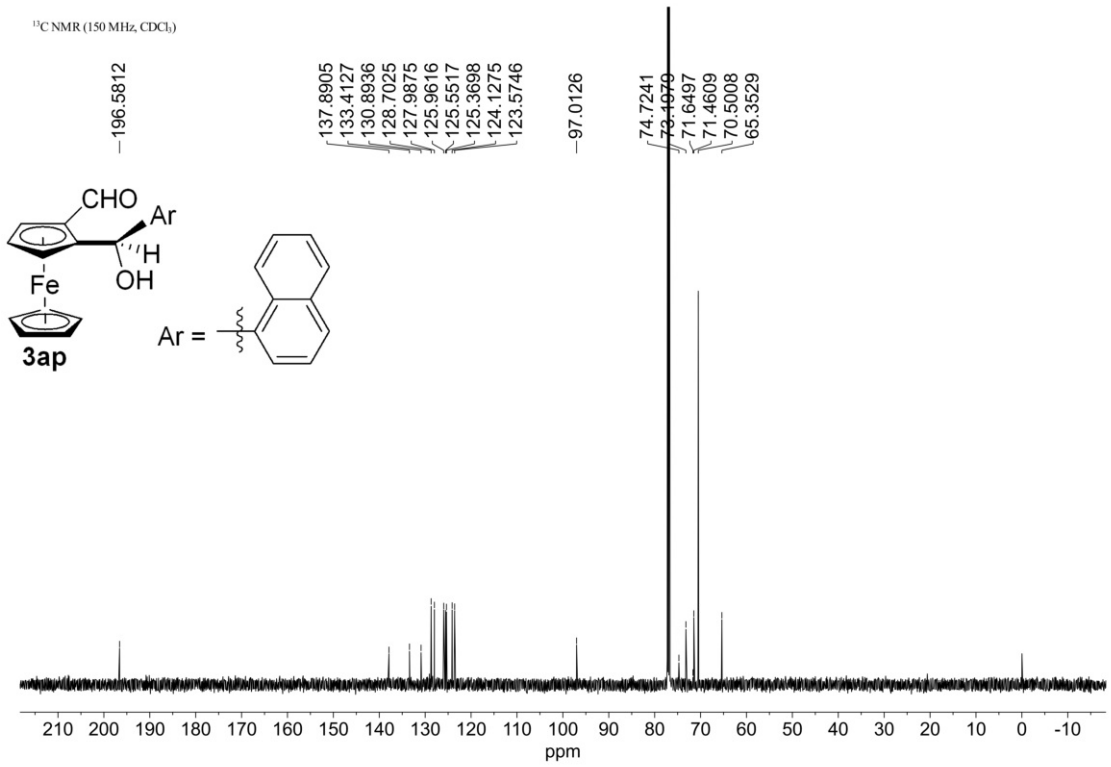



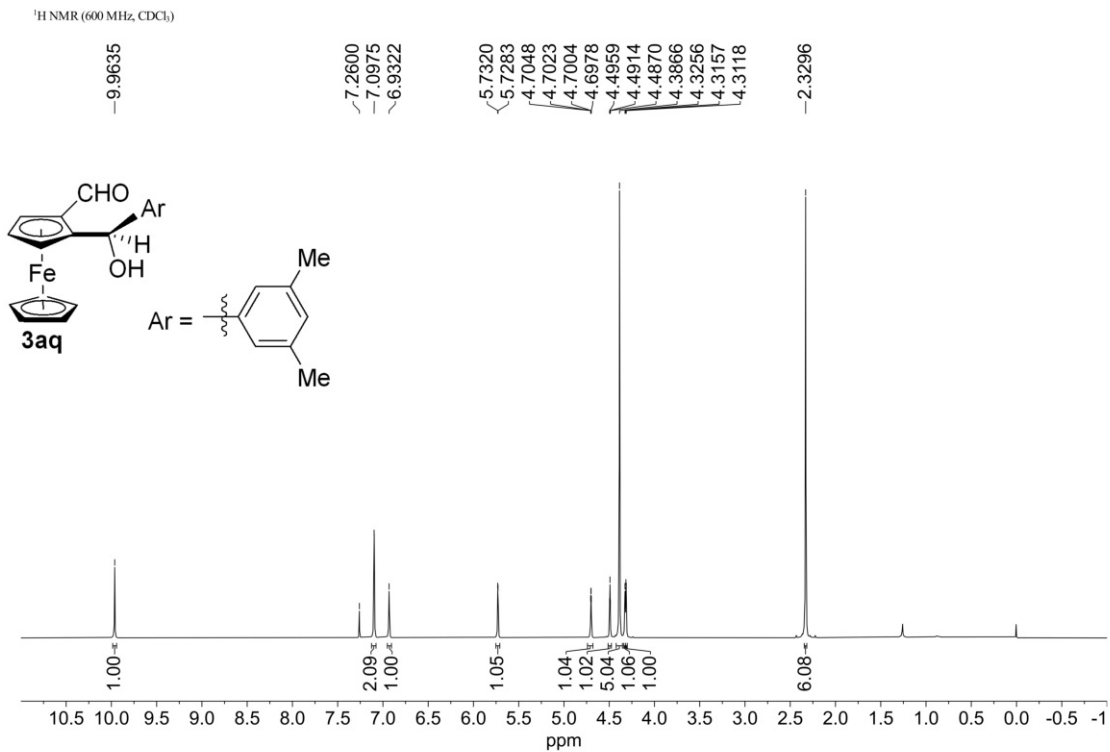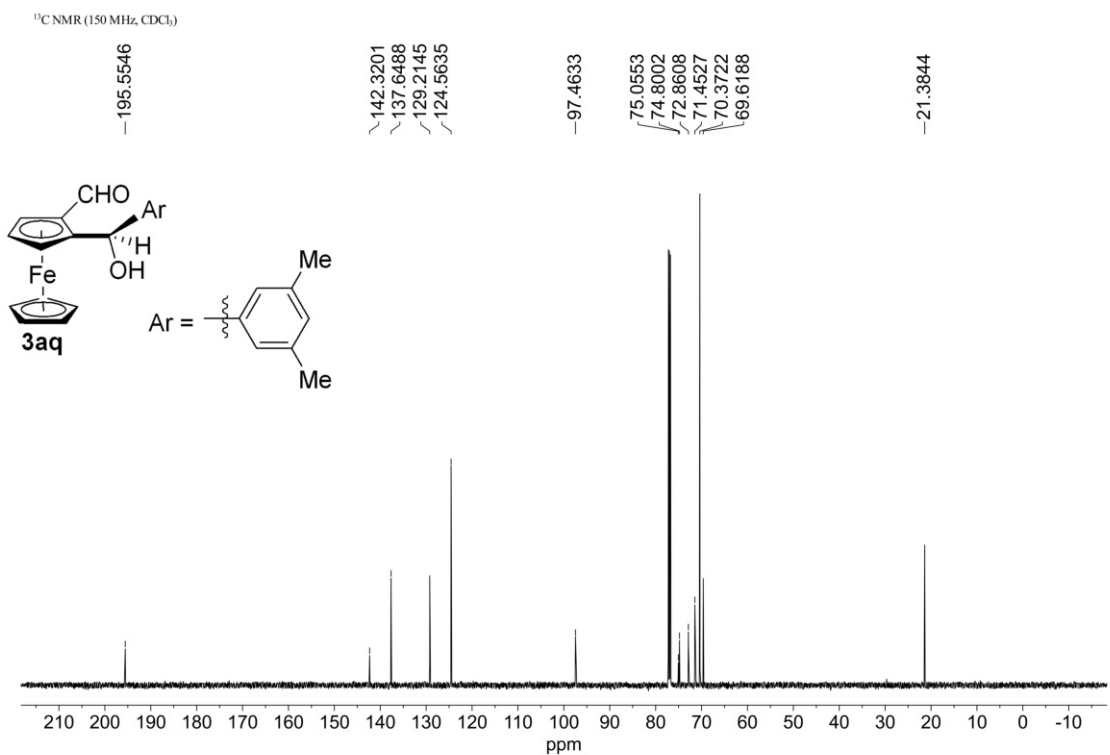

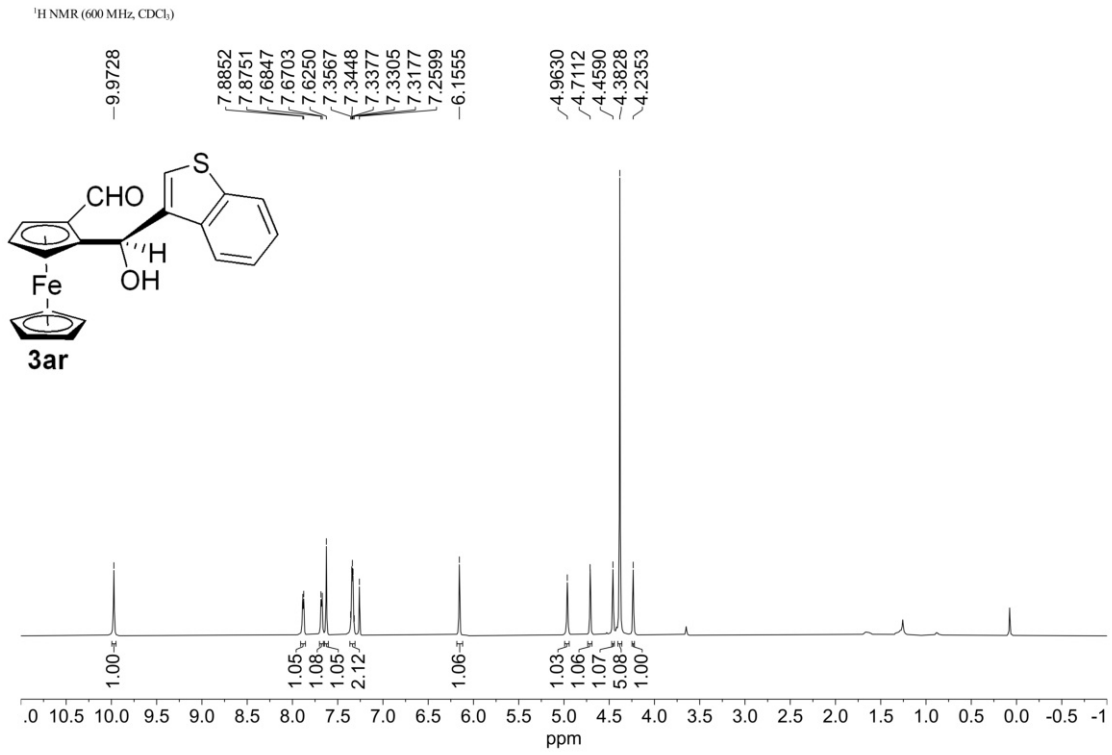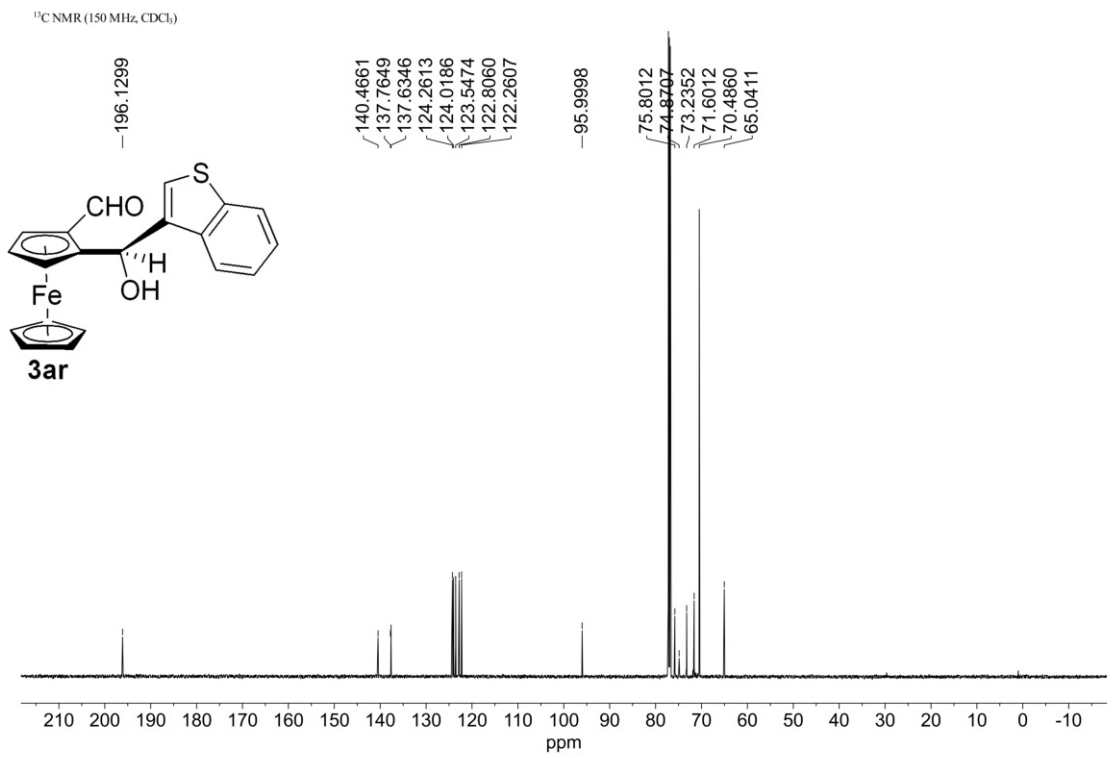

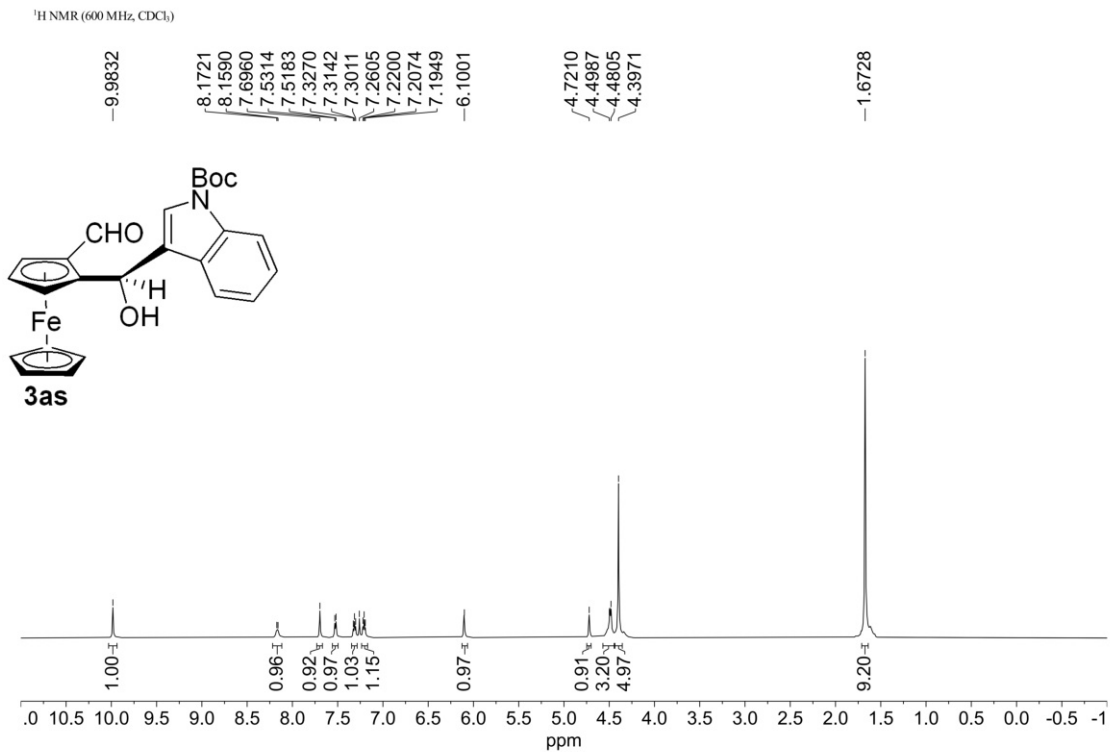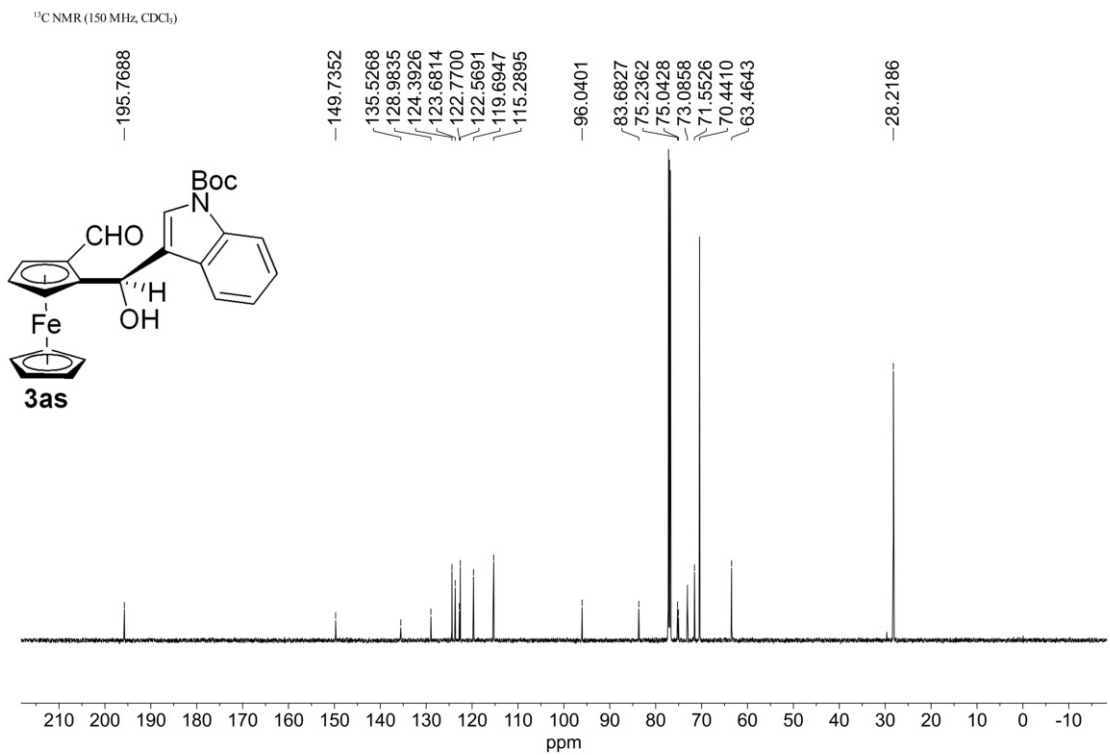

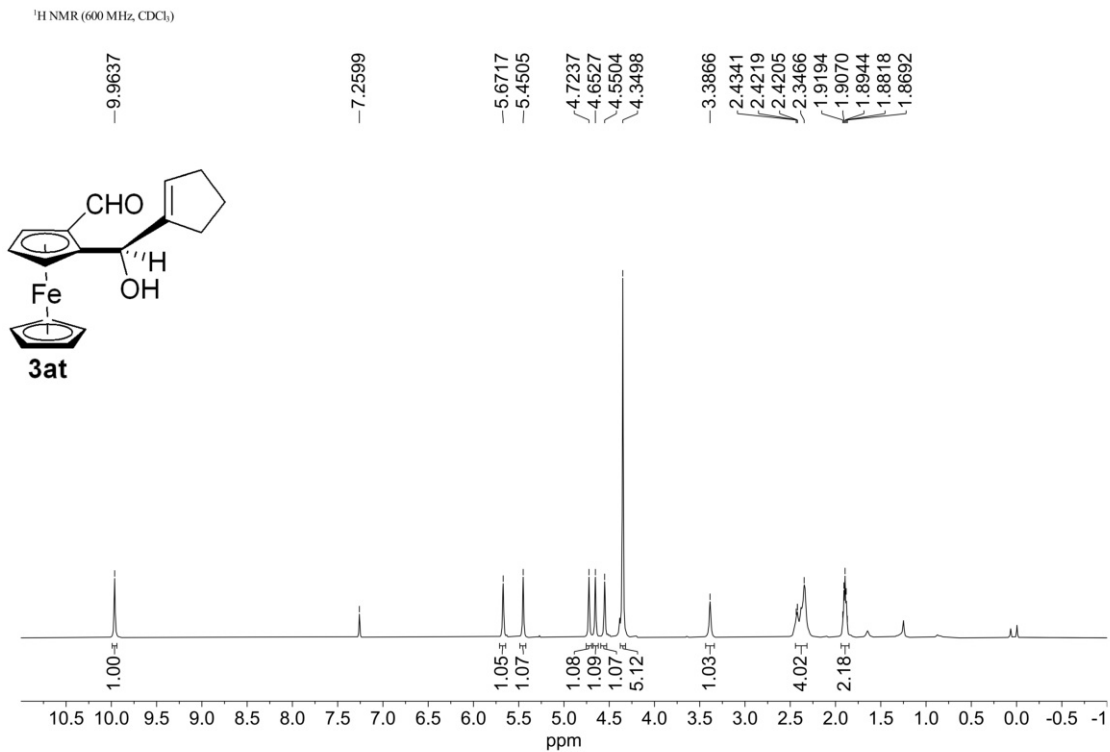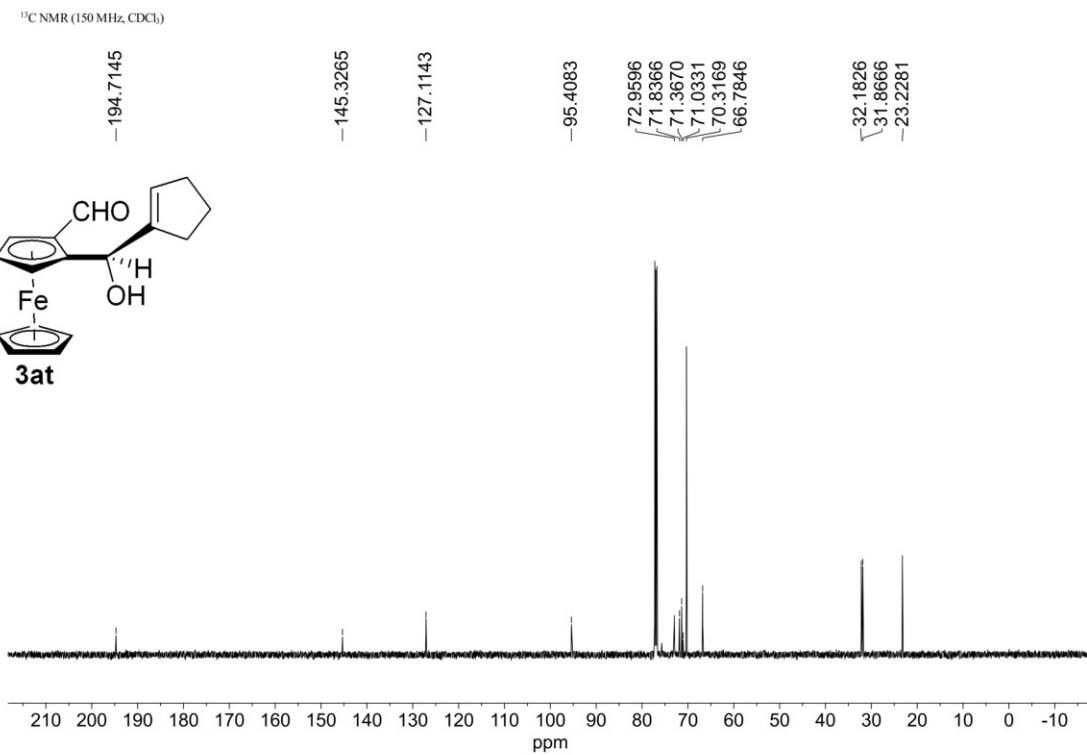

<sup>1</sup>H NMR (600 MHz, CDCl<sub>3</sub>)

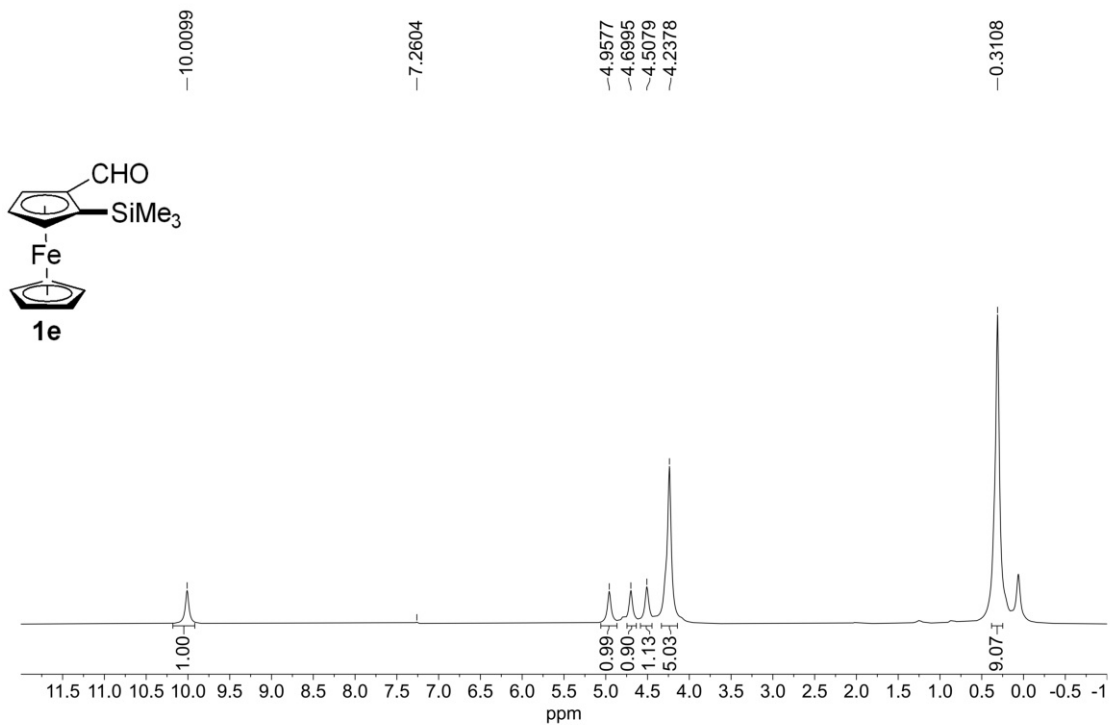

<sup>1</sup>H NMR (600 MHz, CDCl<sub>3</sub>)

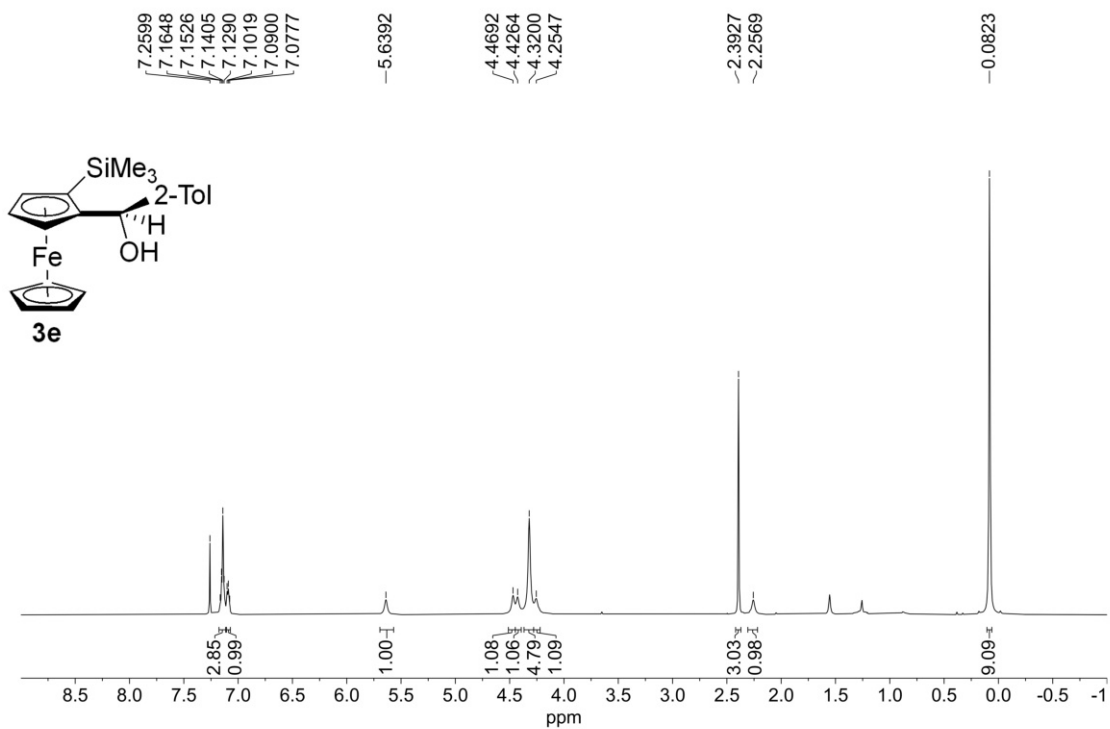

<sup>13</sup>C NMR (150 MHz, CDCl<sub>3</sub>)

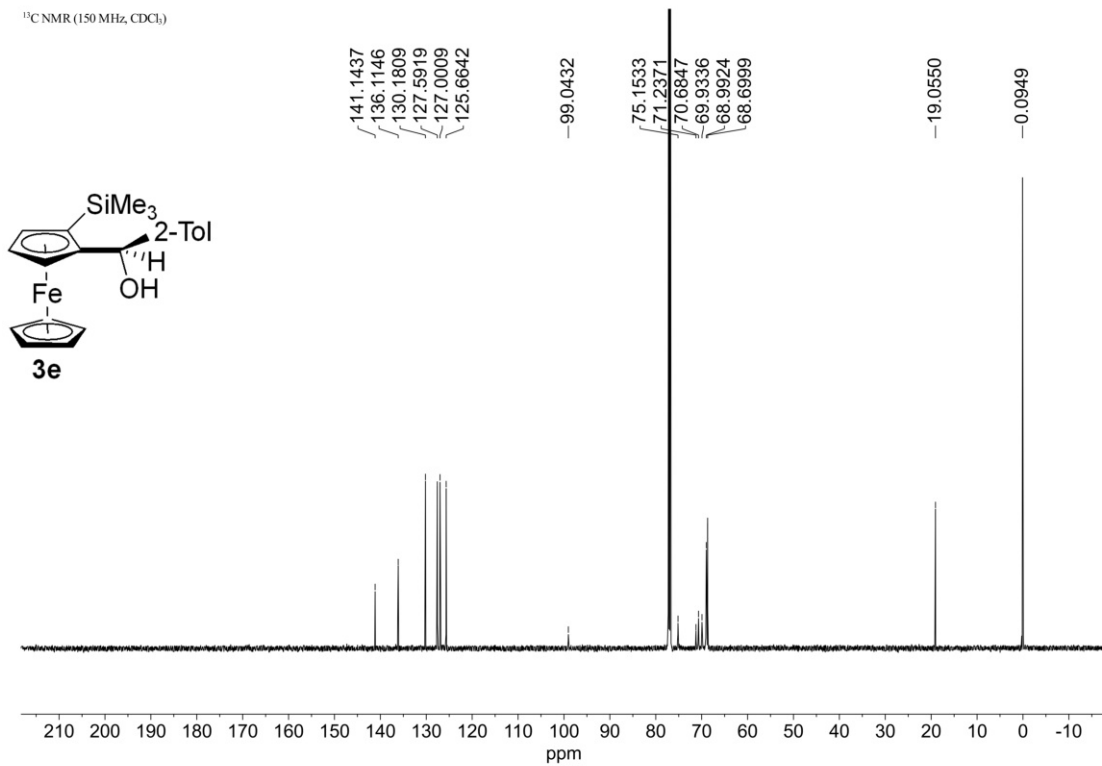

<sup>1</sup>H NMR (600 MHz, CDCl<sub>3</sub>)

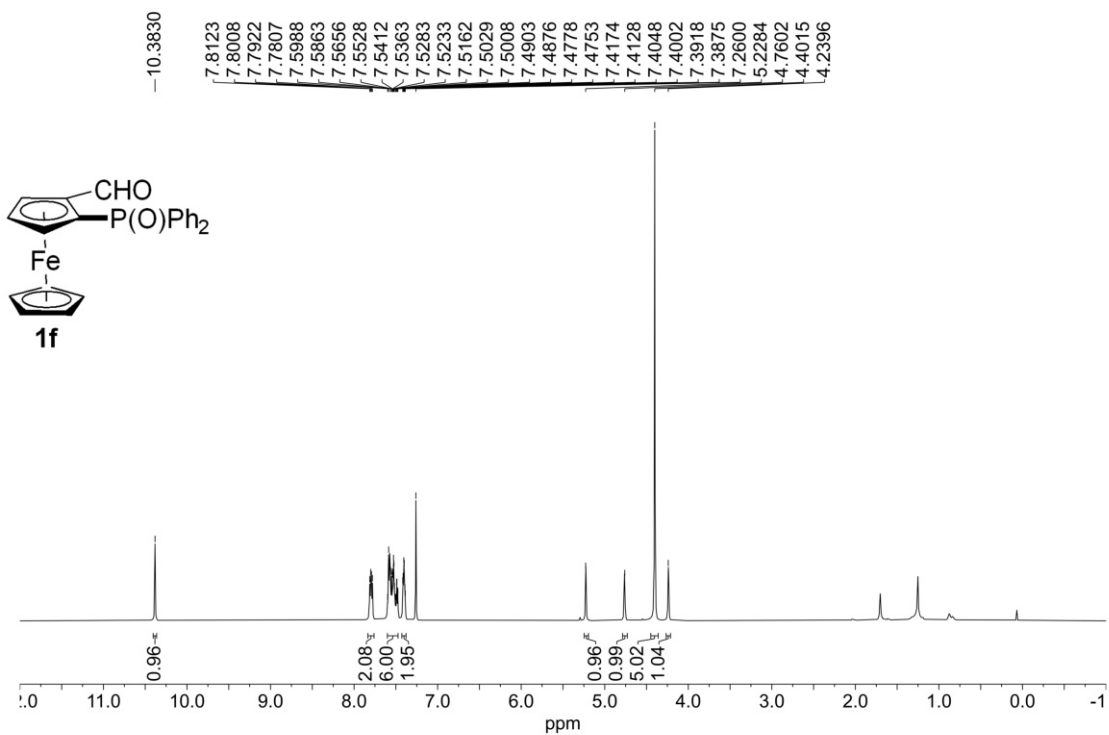

<sup>31</sup>P NMR (243 MHz, CDCl<sub>3</sub>)

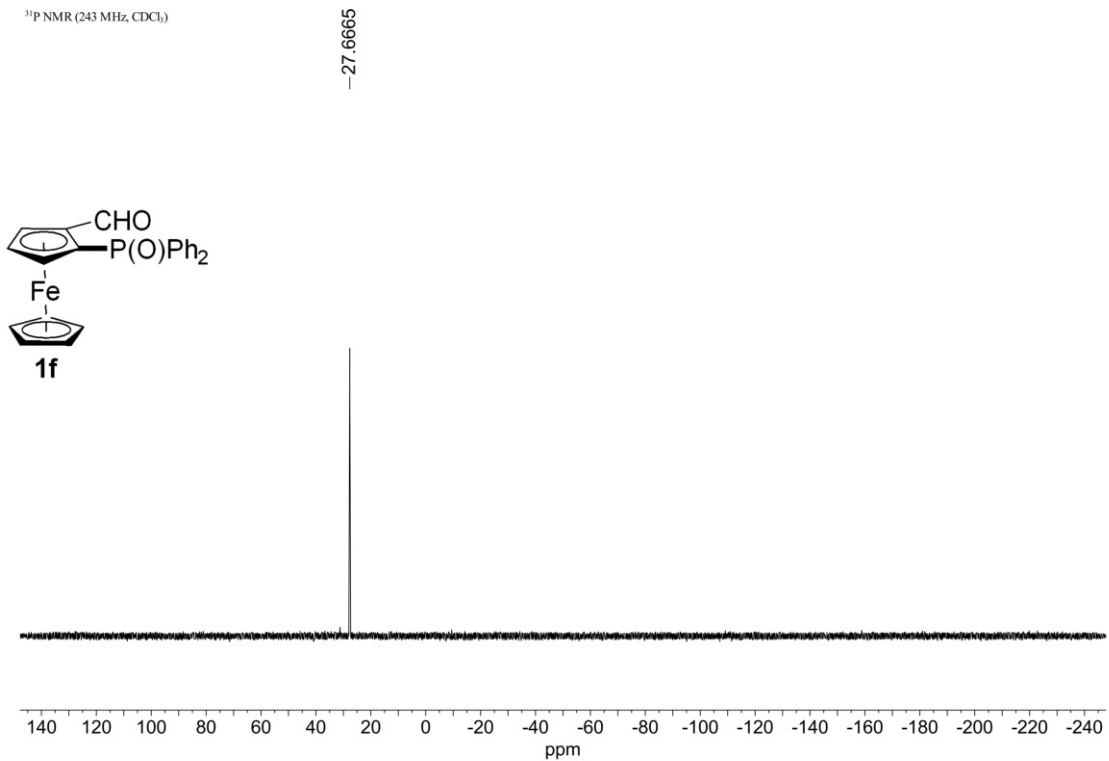

<sup>1</sup>H NMR (600 MHz, CDCl<sub>3</sub>)

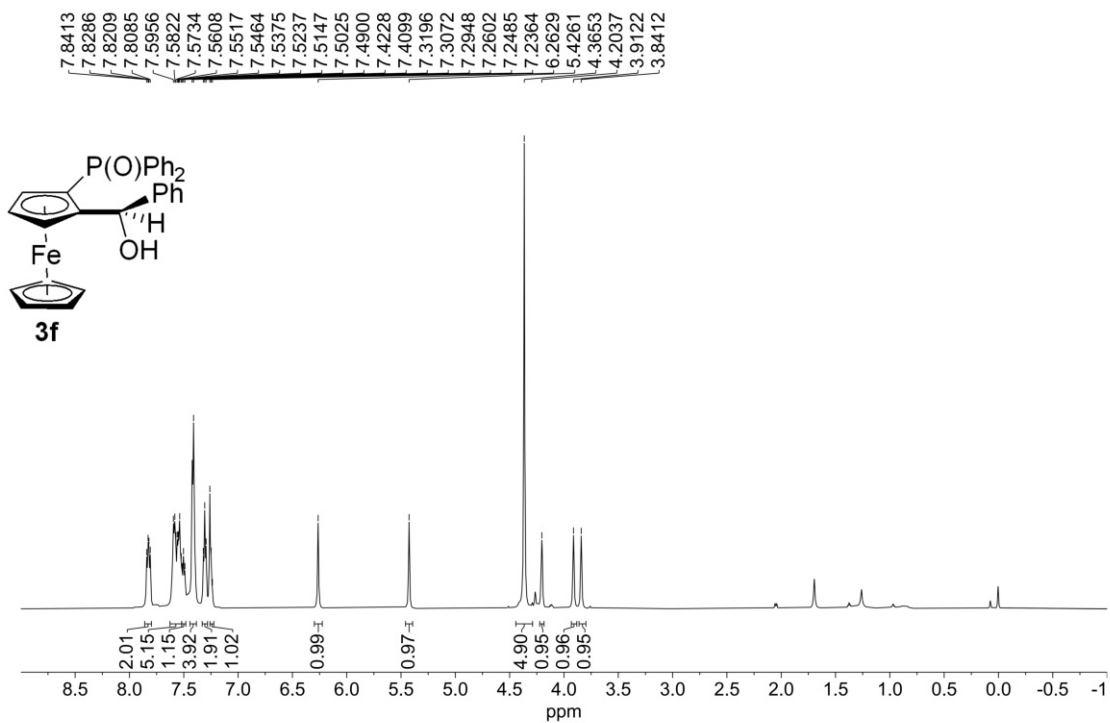

<sup>13</sup>C NMR (150 MHz, CDCl<sub>3</sub>)

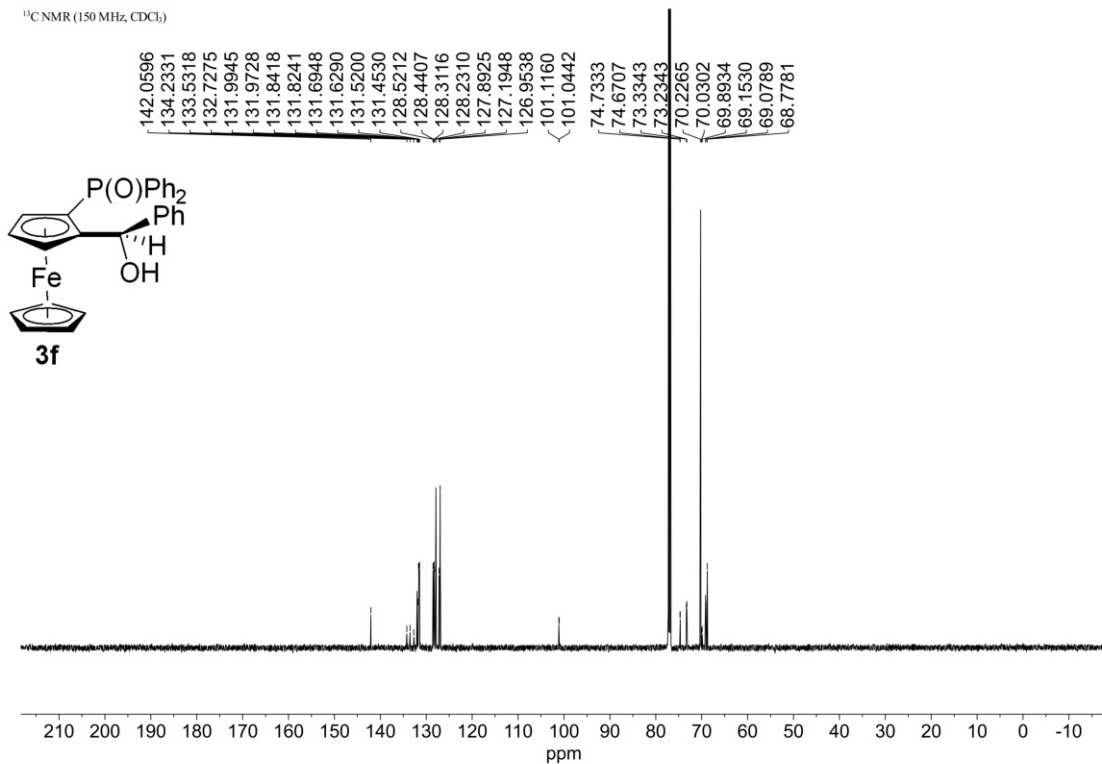



<sup>31</sup>P NMR (243 MHz, CDCl<sub>3</sub>)

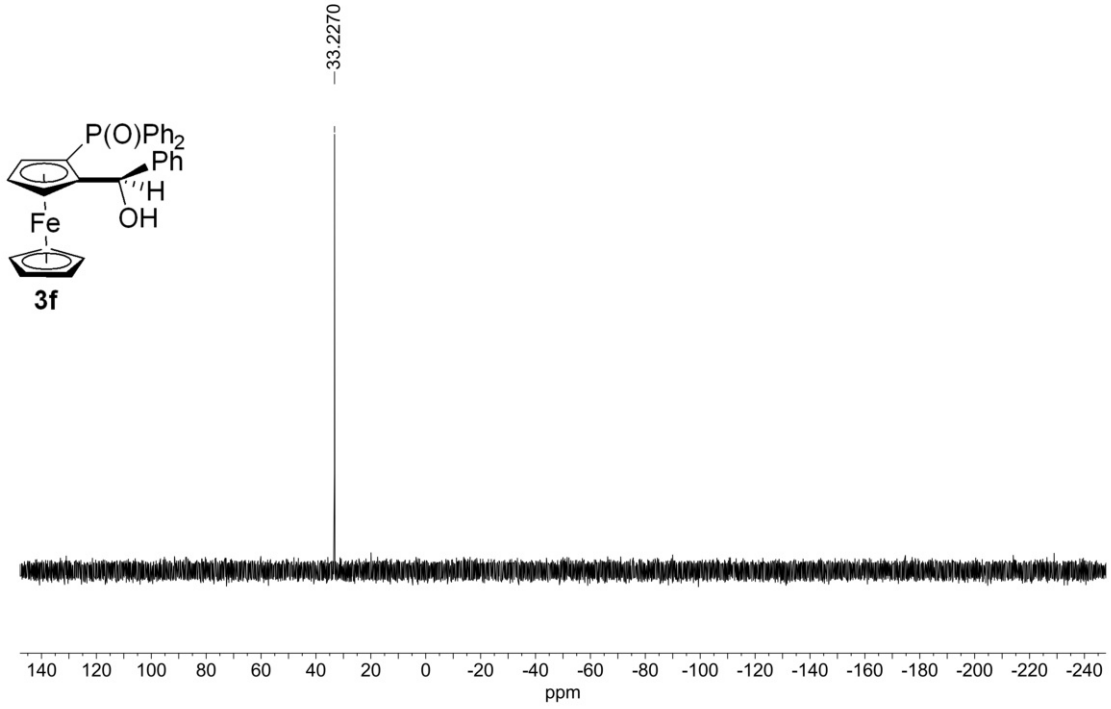

<sup>1</sup>H NMR (600 MHz, CDCl<sub>3</sub>)

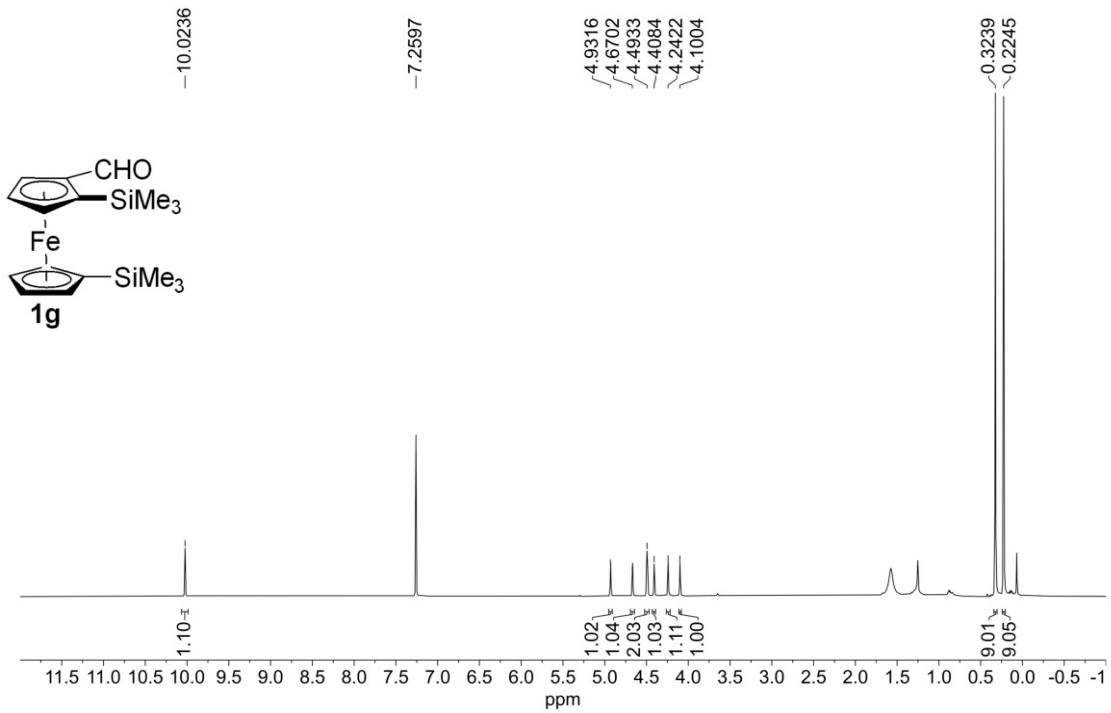



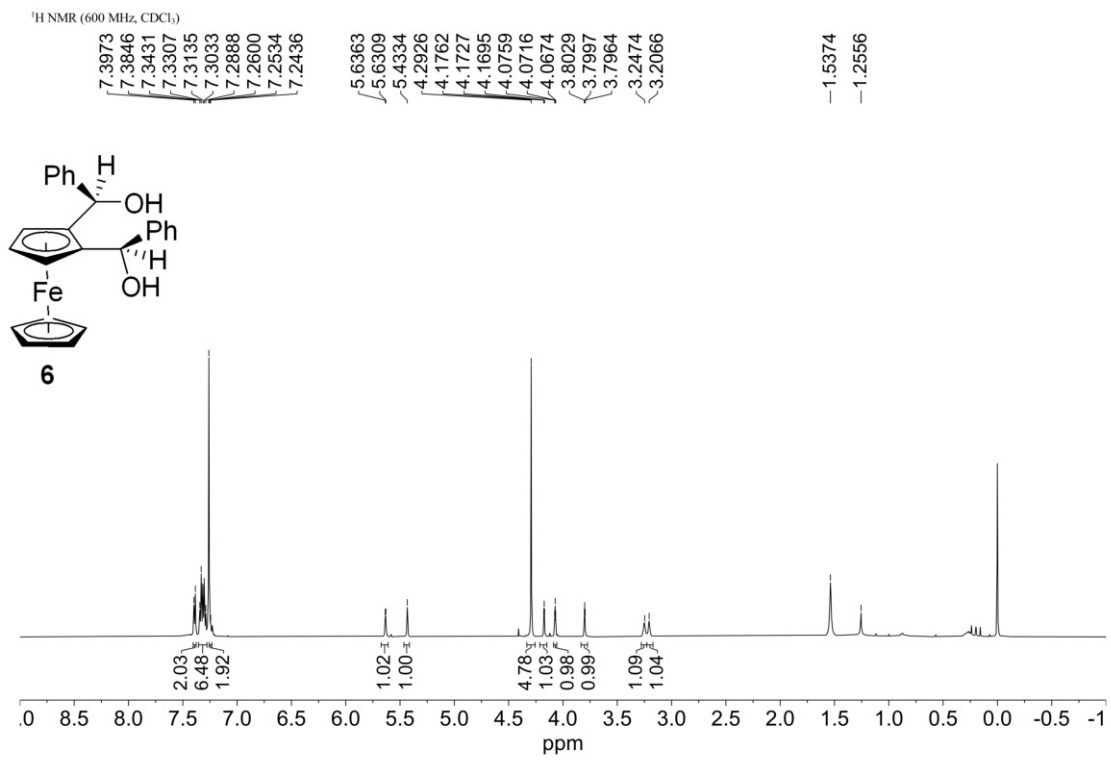

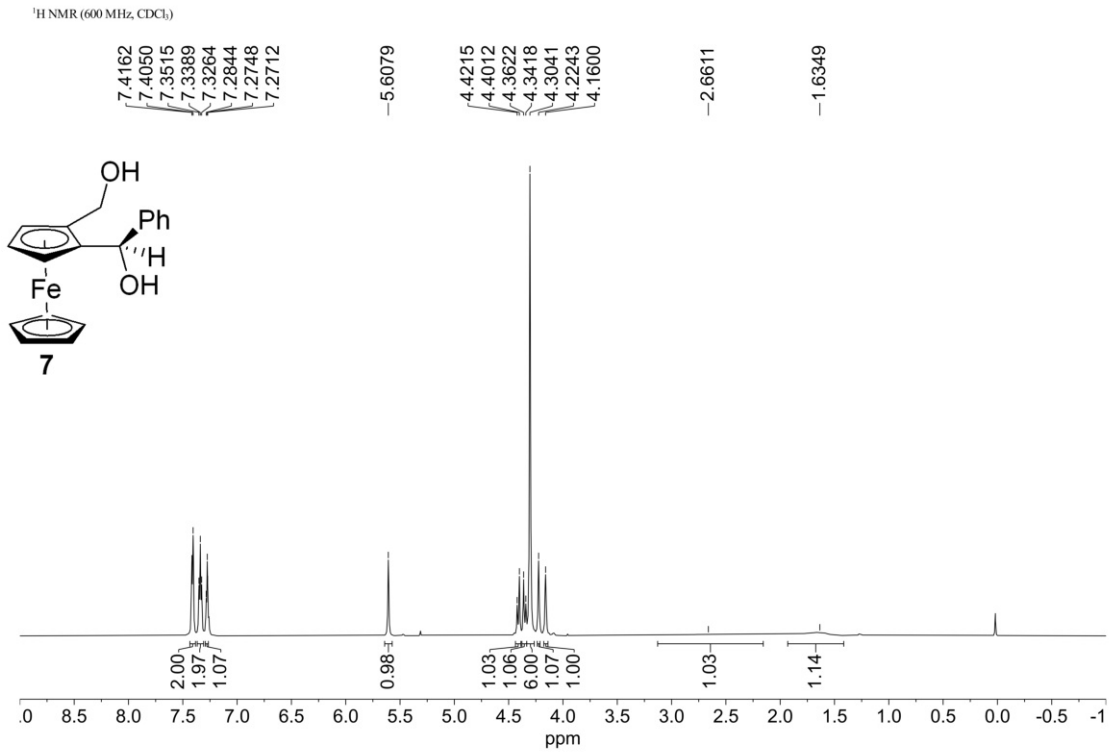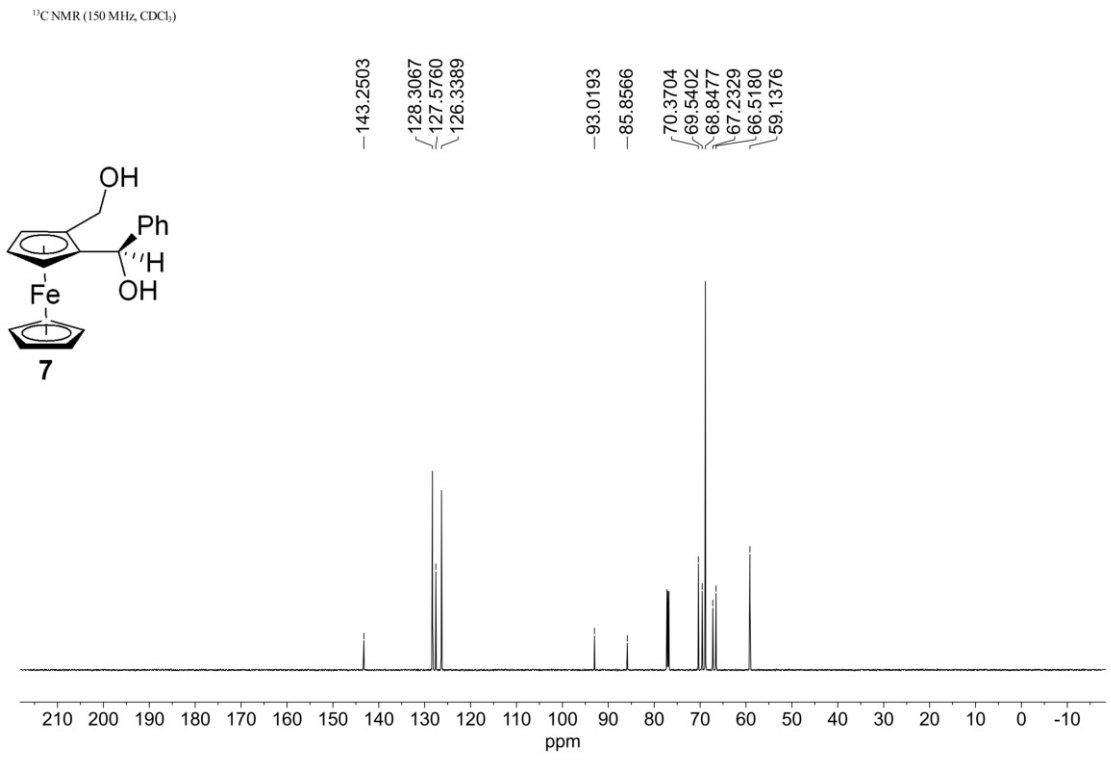

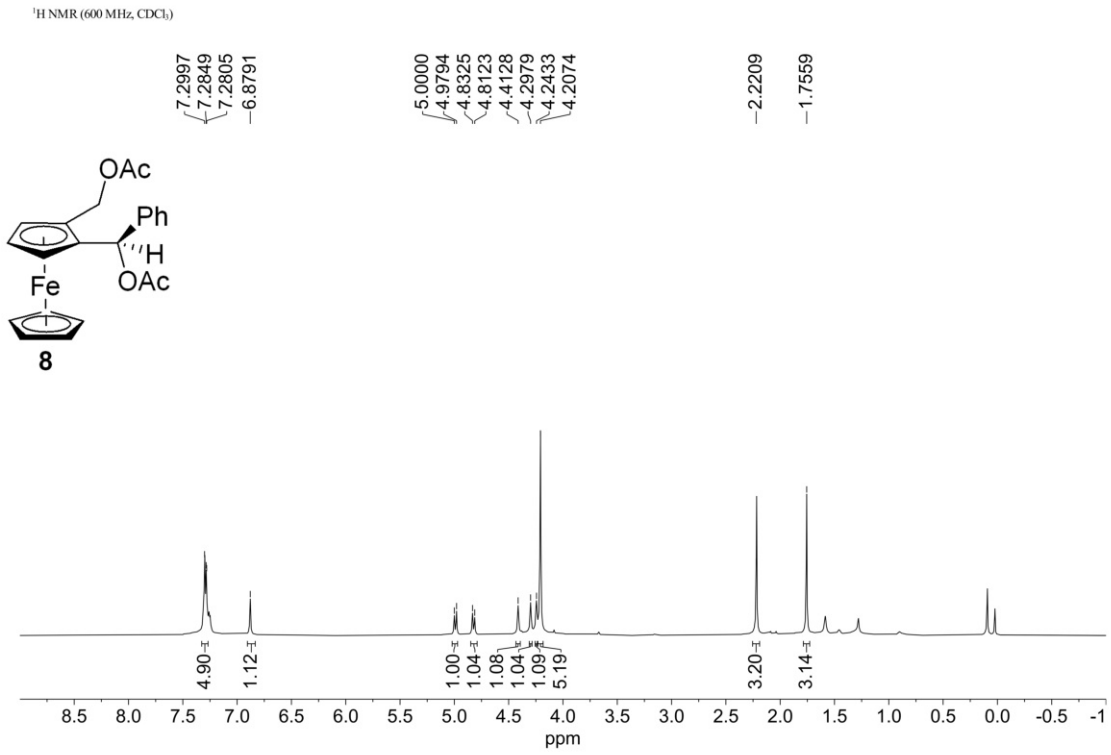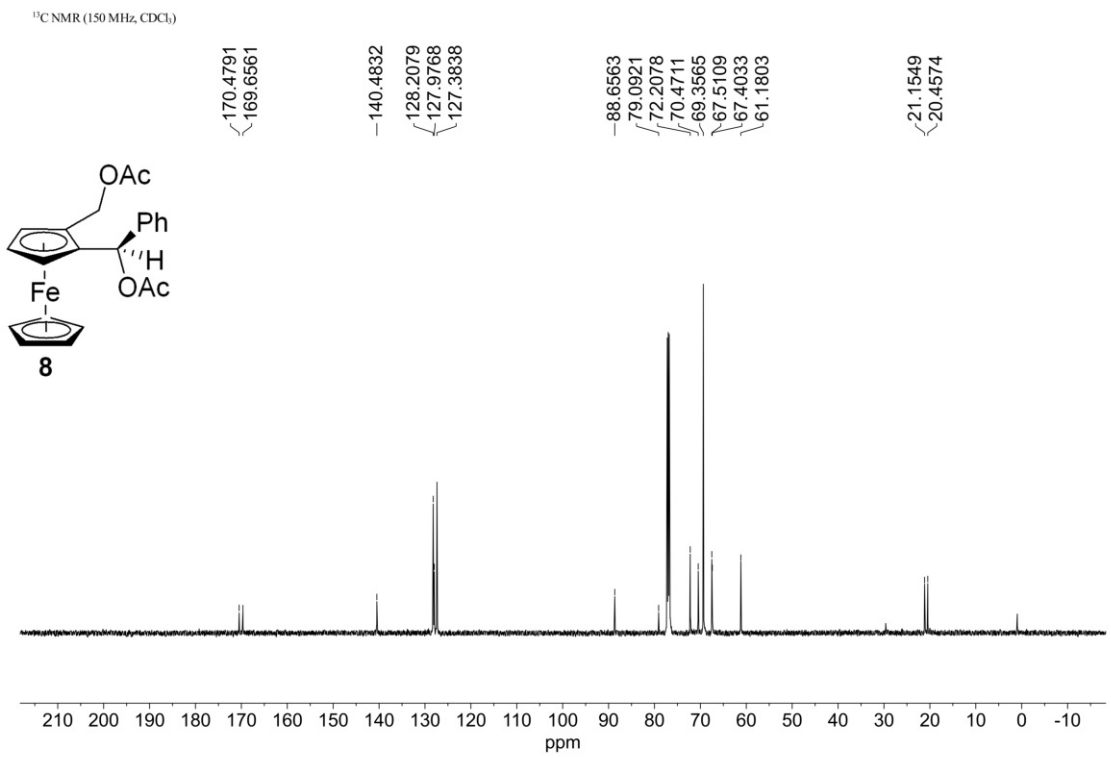

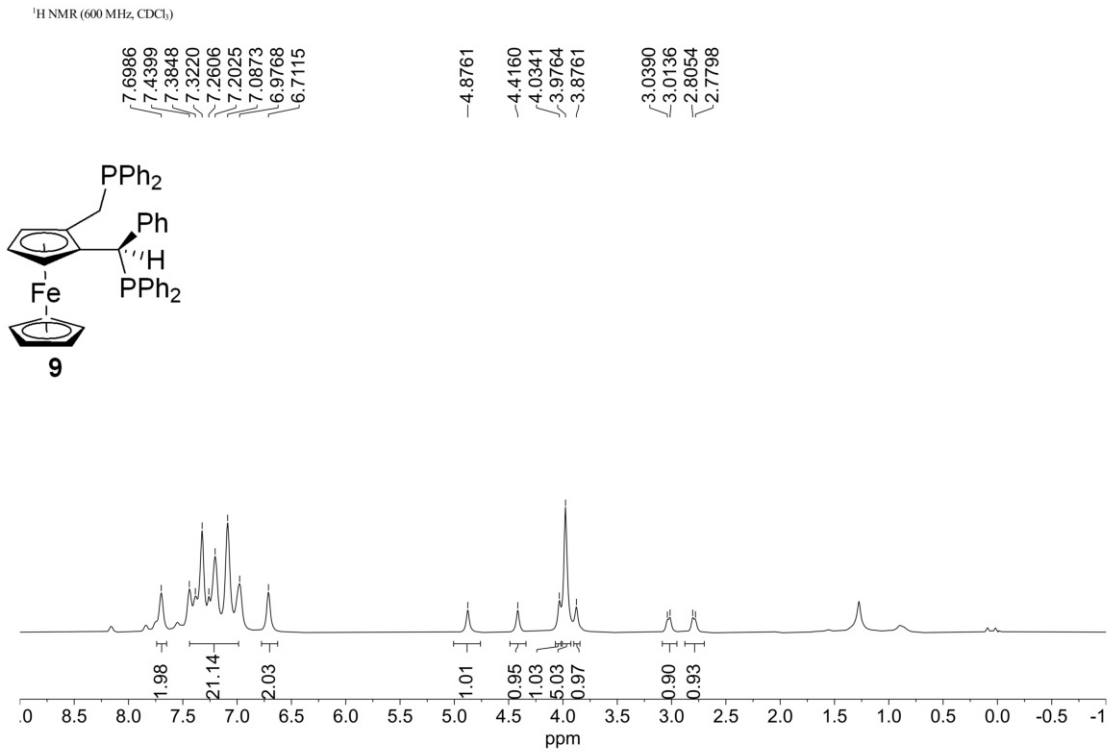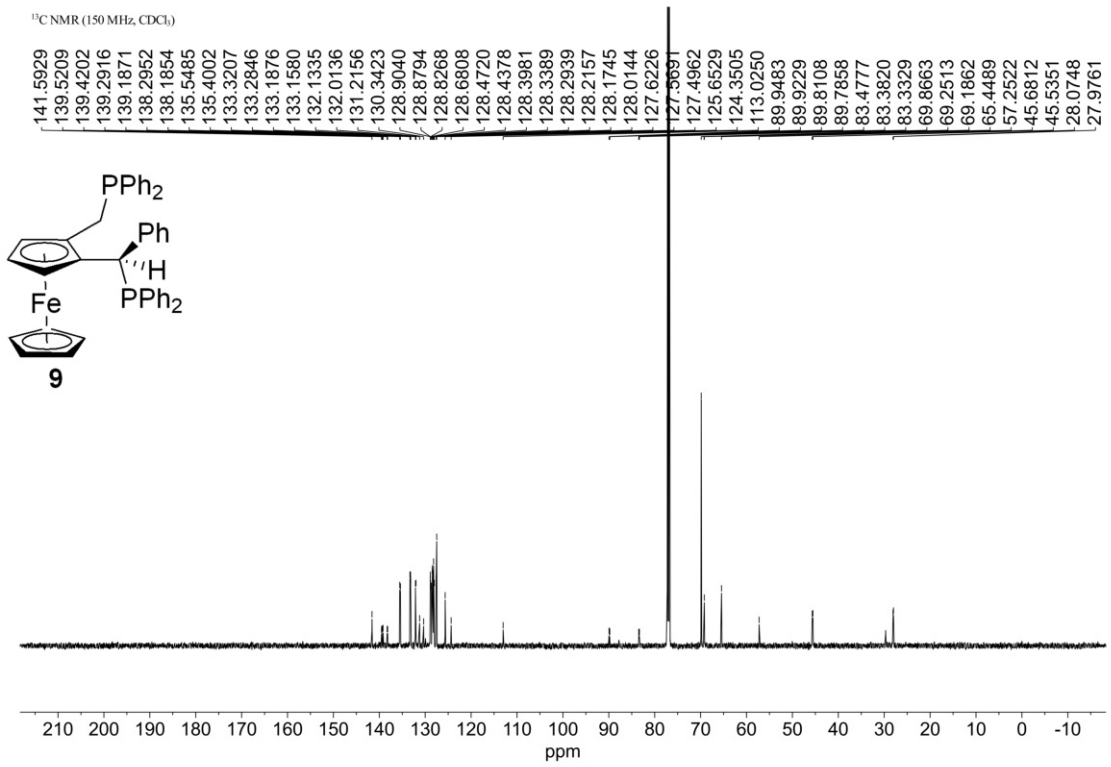

$^{31}\text{P}$  NMR (243 MHz,  $\text{CDCl}_3$ )

— 1.9346  
— -18.5016

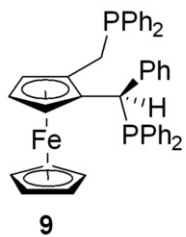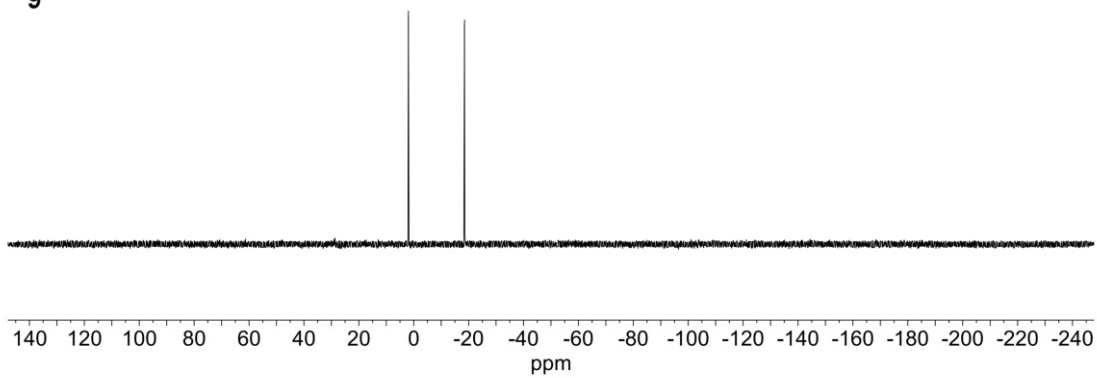

<sup>1</sup>H NMR (600 MHz, CDCl<sub>3</sub>)

7.8344  
7.8321  
7.8206  
7.8182  
7.8141  
7.8119  
7.8004  
7.7979  
7.6032  
7.6003  
7.5903  
7.5879  
7.5553  
7.5505  
7.5431  
7.5382  
7.5290  
7.5179  
7.4824  
7.4796  
7.4699  
7.4675  
7.4649  
7.4056  
7.4028  
7.4005  
7.3925  
7.3898  
7.3874  
7.3786  
7.3753  
7.3740  
7.2600  
5.4783  
5.4736  
5.4608  
5.4560  
4.5372  
4.3443  
4.3409  
4.3385  
4.3368  
4.3342  
4.3215  
4.3169  
4.2560  
4.1847  
4.1673  
4.1455  
3.9326

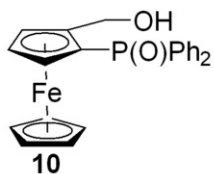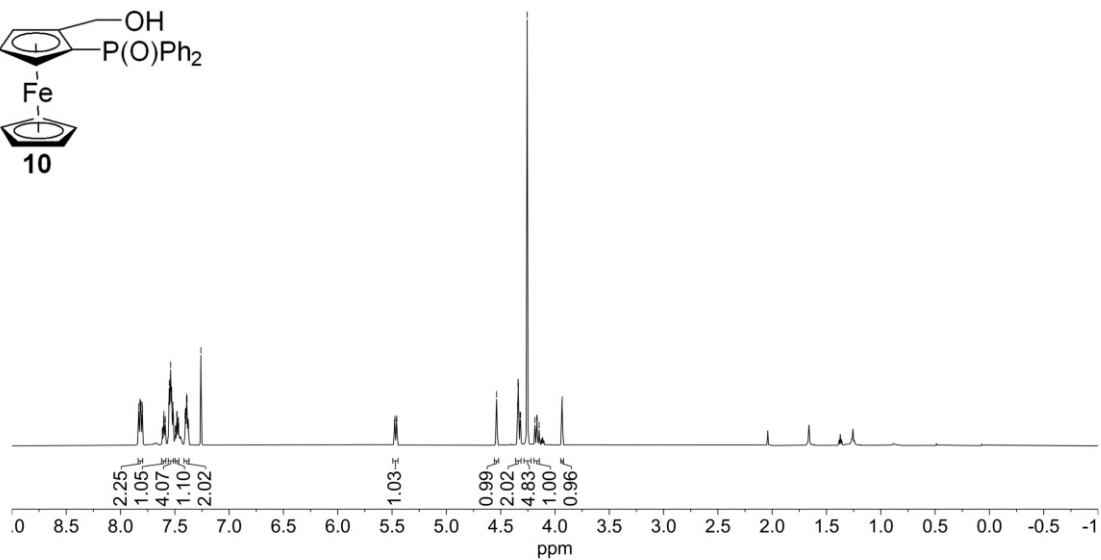

<sup>31</sup>P NMR (243 MHz, CDCl<sub>3</sub>)

33.4428

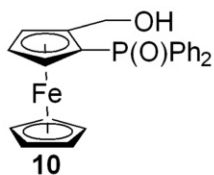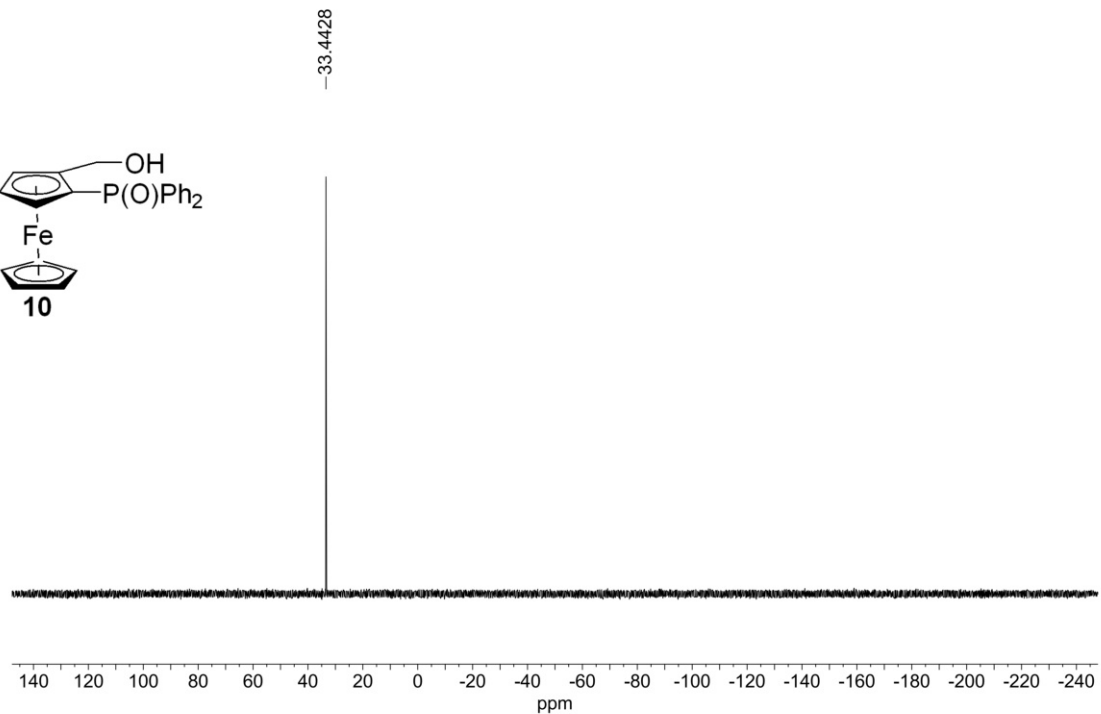



<sup>1</sup>H NMR (600 MHz, CDCl<sub>3</sub>)

7.6127  
7.6089  
7.6034  
7.5994  
7.5960  
7.5895  
7.5833  
7.4486  
7.4421  
7.4360  
7.4314  
7.4234  
7.4202  
7.4041  
7.4004  
7.3947  
7.3528  
7.3471  
7.3432  
7.3309  
7.3249  
7.3208  
7.3135  
7.3104  
7.2650  
7.2604  
7.2559  
7.2514  
7.2180  
7.2125  
7.2058  
7.2008  
7.1936  
7.1900  
4.0830  
4.1496  
3.9742  
3.7613  
3.3635

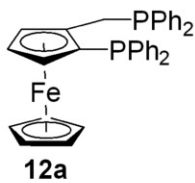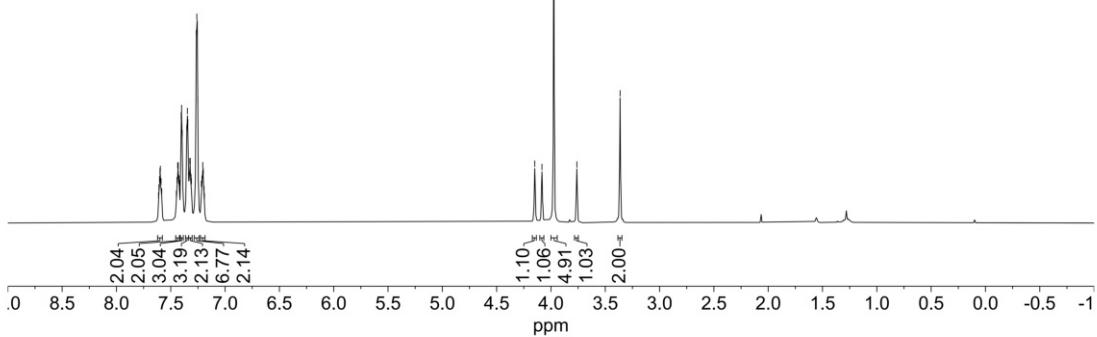

<sup>31</sup>P NMR (243 MHz, CDCl<sub>3</sub>)

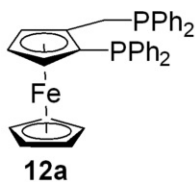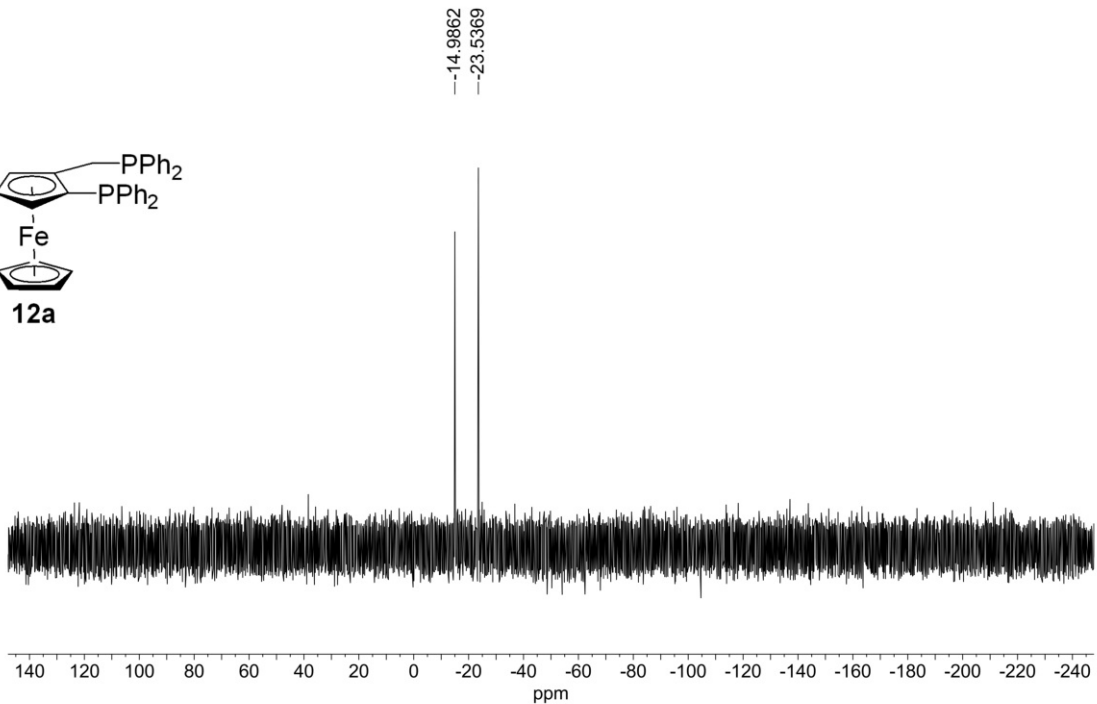

<sup>1</sup>H NMR (600 MHz, CDCl<sub>3</sub>)

7.6101  
7.6043  
7.5984  
7.5947  
7.5909  
7.5853  
7.5811  
7.3842  
7.3787  
7.3739  
7.2603  
7.2496  
7.2403  
7.2290

-4.7569

-4.2058  
-3.9852  
-3.7670

2.8202  
2.7929  
2.6351  
2.6267  
2.6078  
2.5993

1.2003  
1.1820  
0.9022  
0.8841

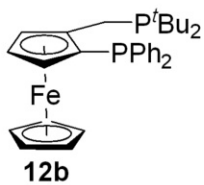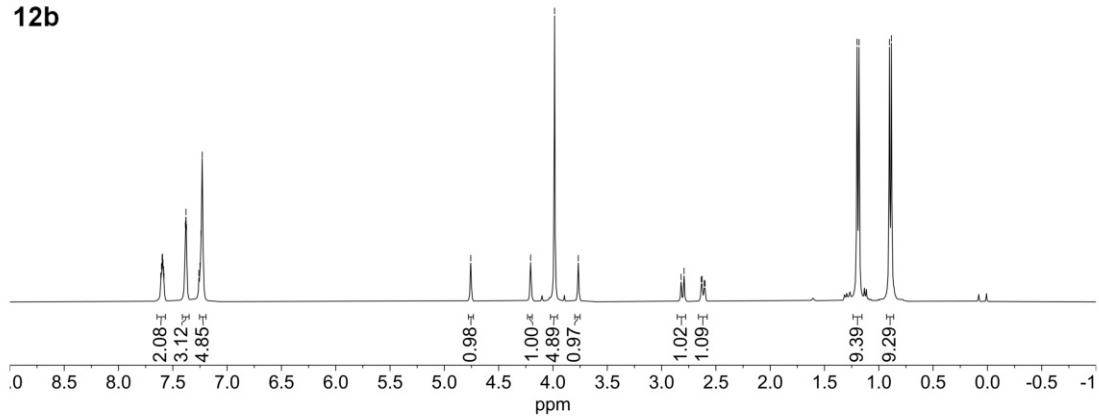

<sup>31</sup>P NMR (243 MHz, CDCl<sub>3</sub>)

-26.9077

-23.5821

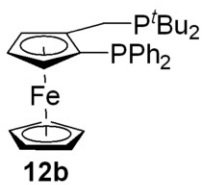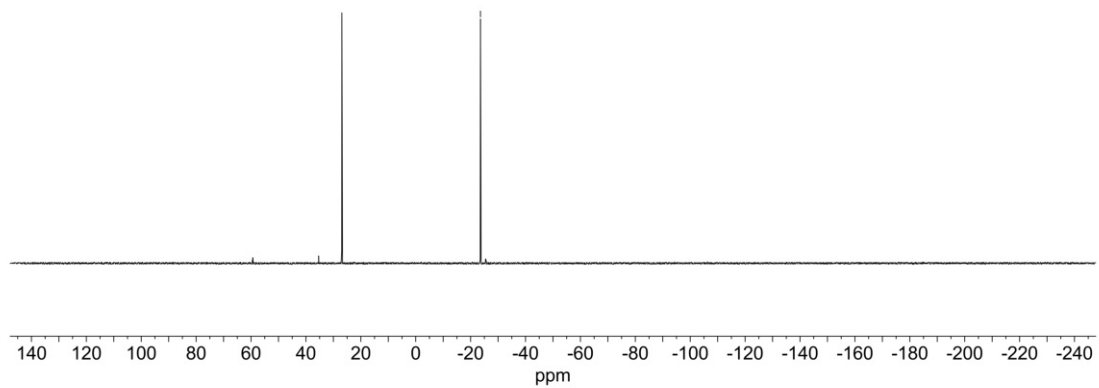

<sup>1</sup>H NMR (600 MHz, CDCl<sub>3</sub>)

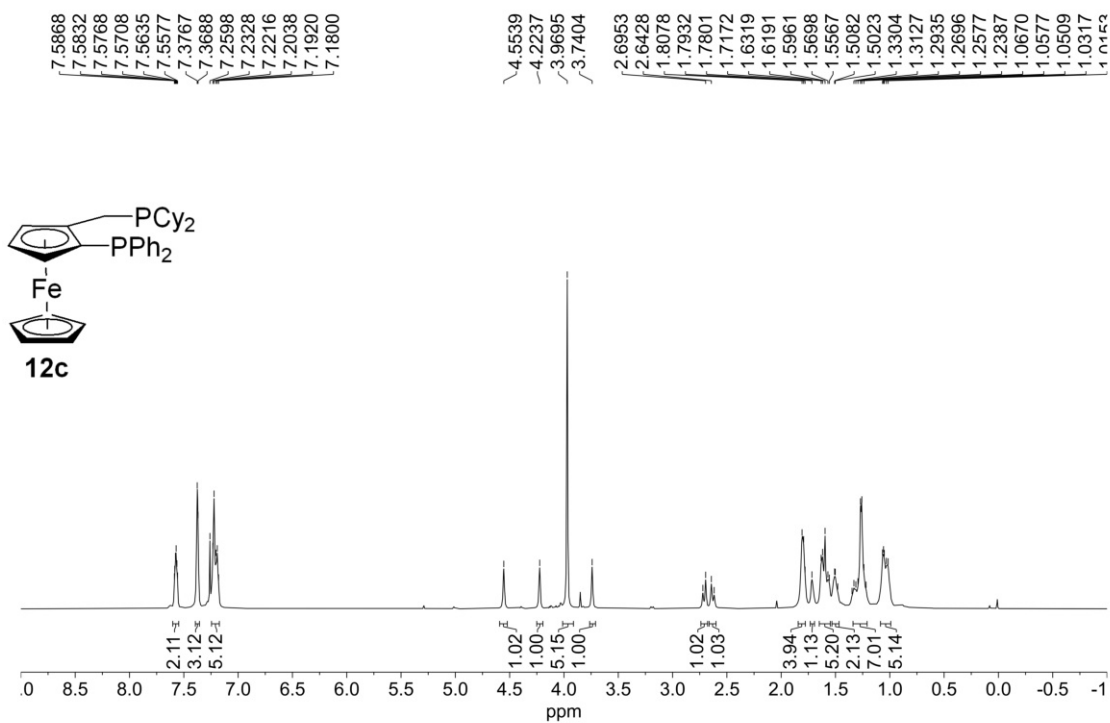

<sup>31</sup>P NMR (243 MHz, CDCl<sub>3</sub>)

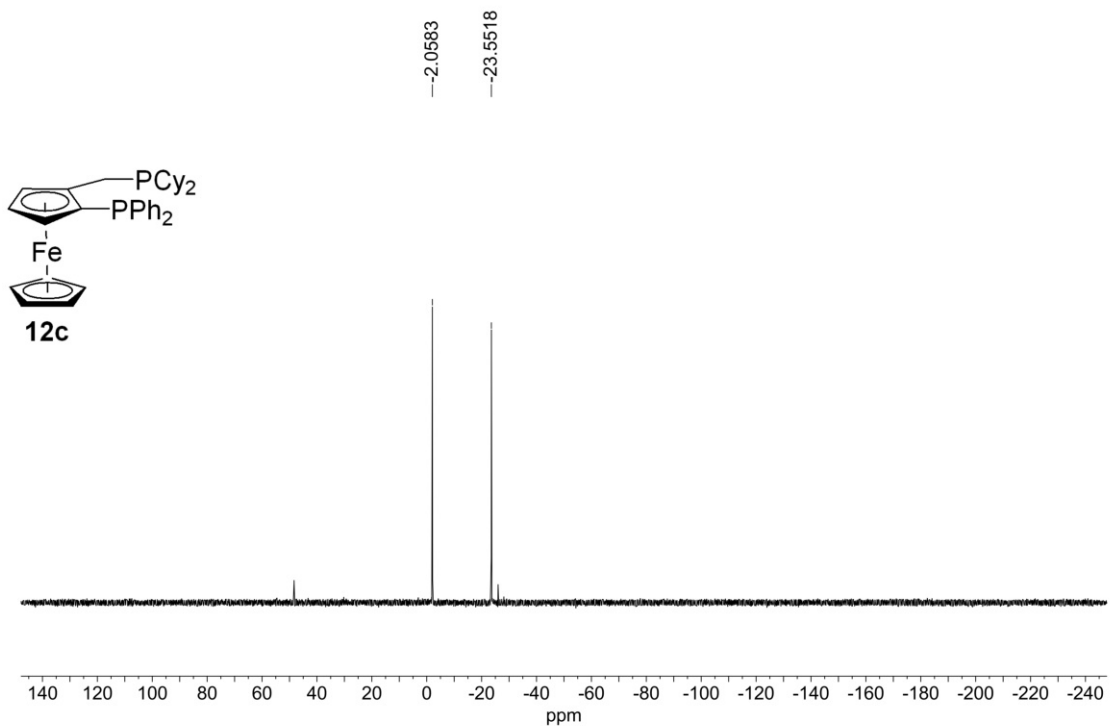

<sup>1</sup>H NMR (600 MHz, CDCl<sub>3</sub>)

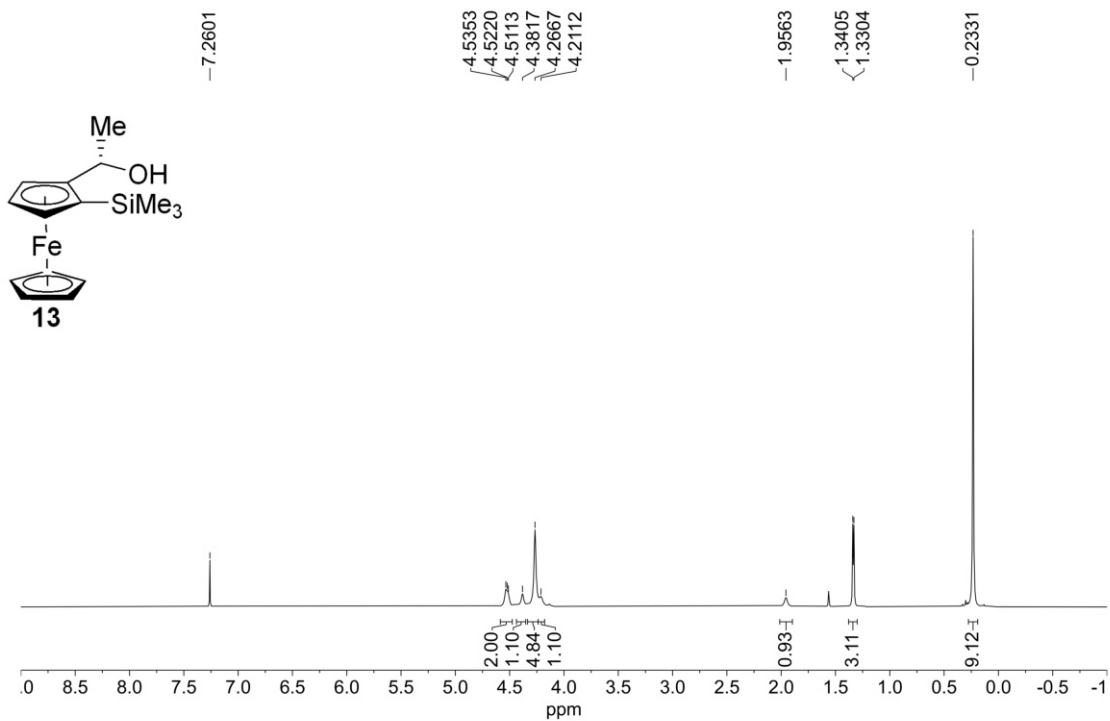

<sup>1</sup>H NMR (600 MHz, CDCl<sub>3</sub>)

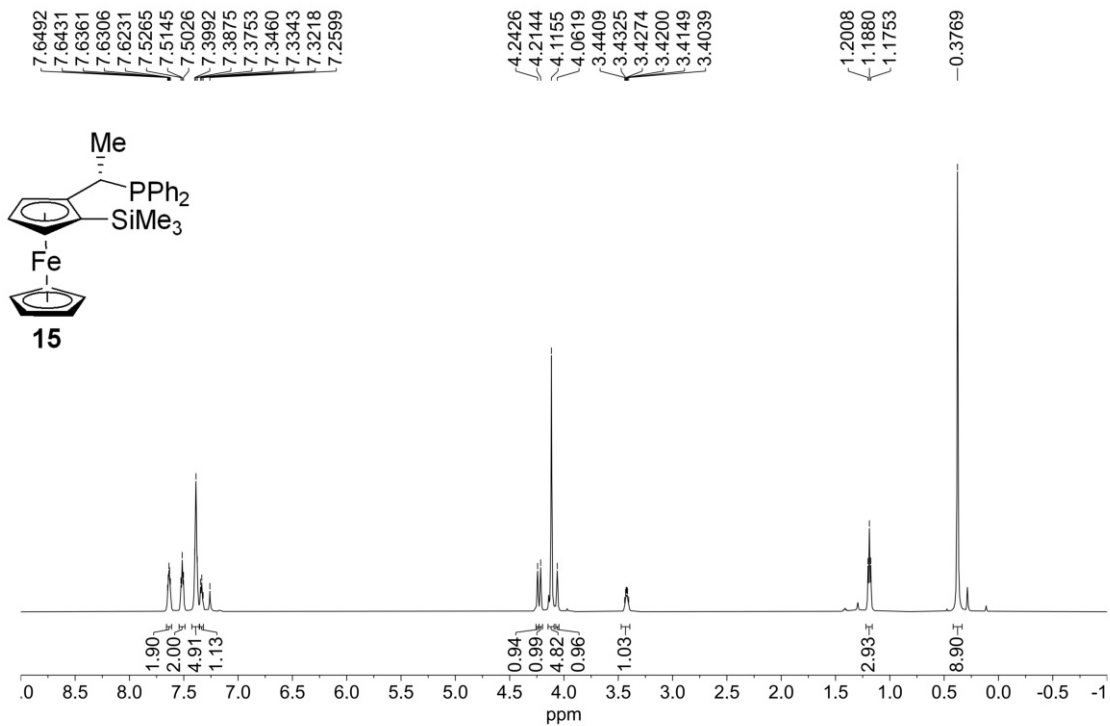

<sup>31</sup>P NMR (243 MHz, CDCl<sub>3</sub>)

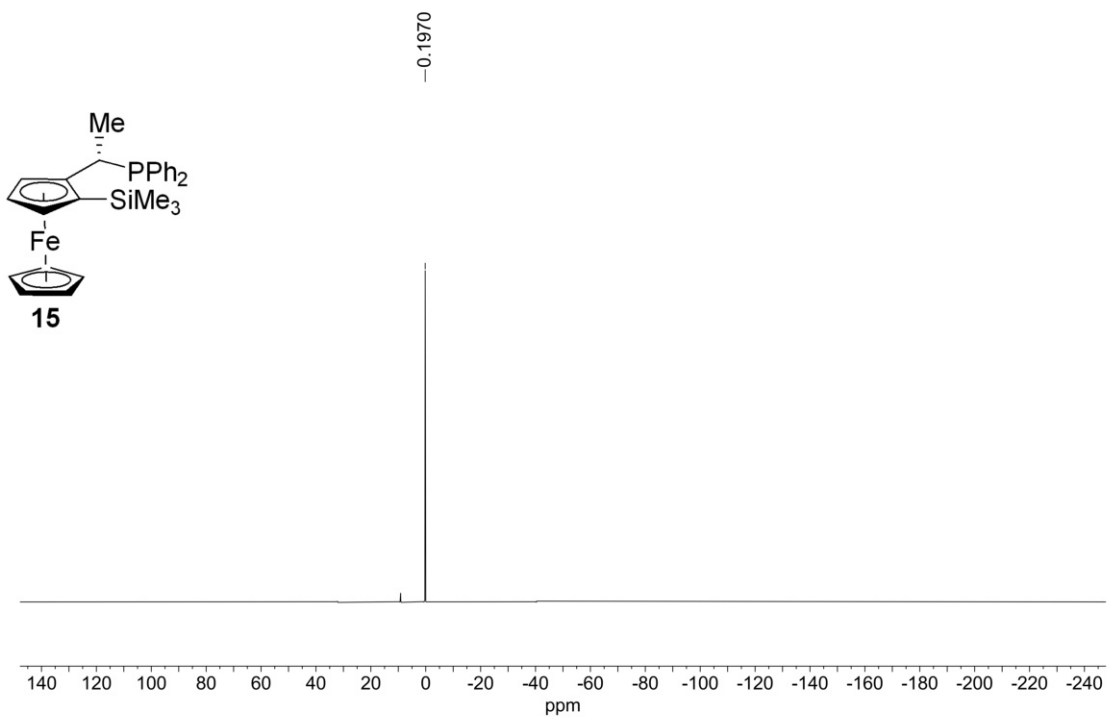

<sup>1</sup>H NMR (600 MHz, CDCl<sub>3</sub>)

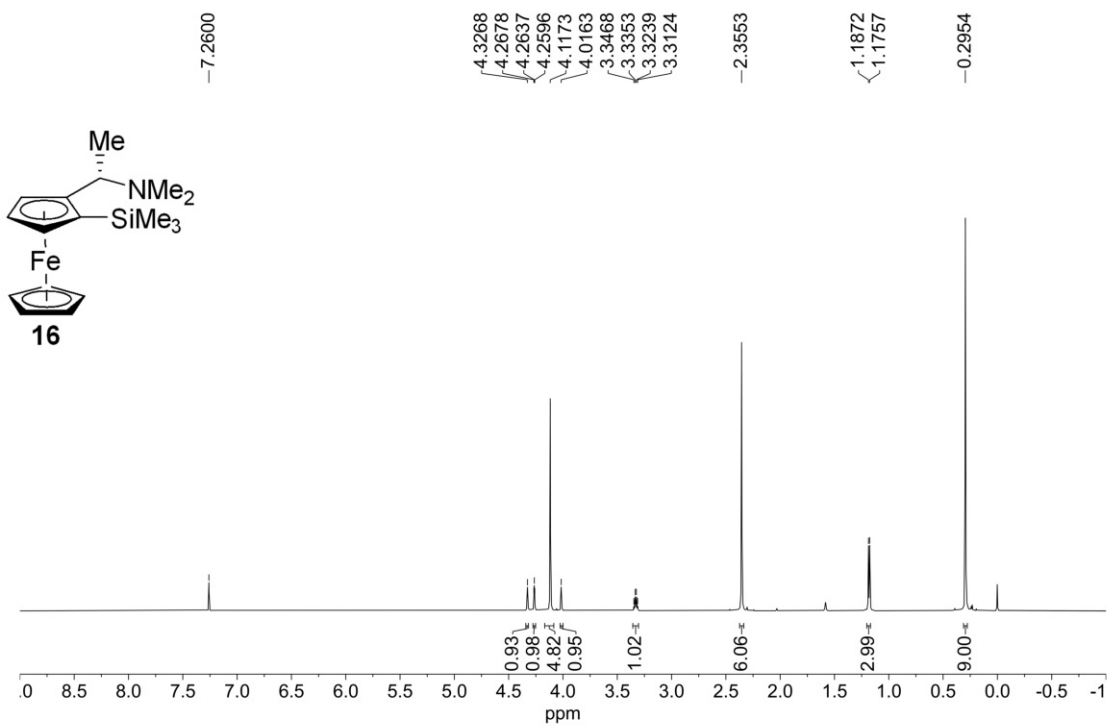

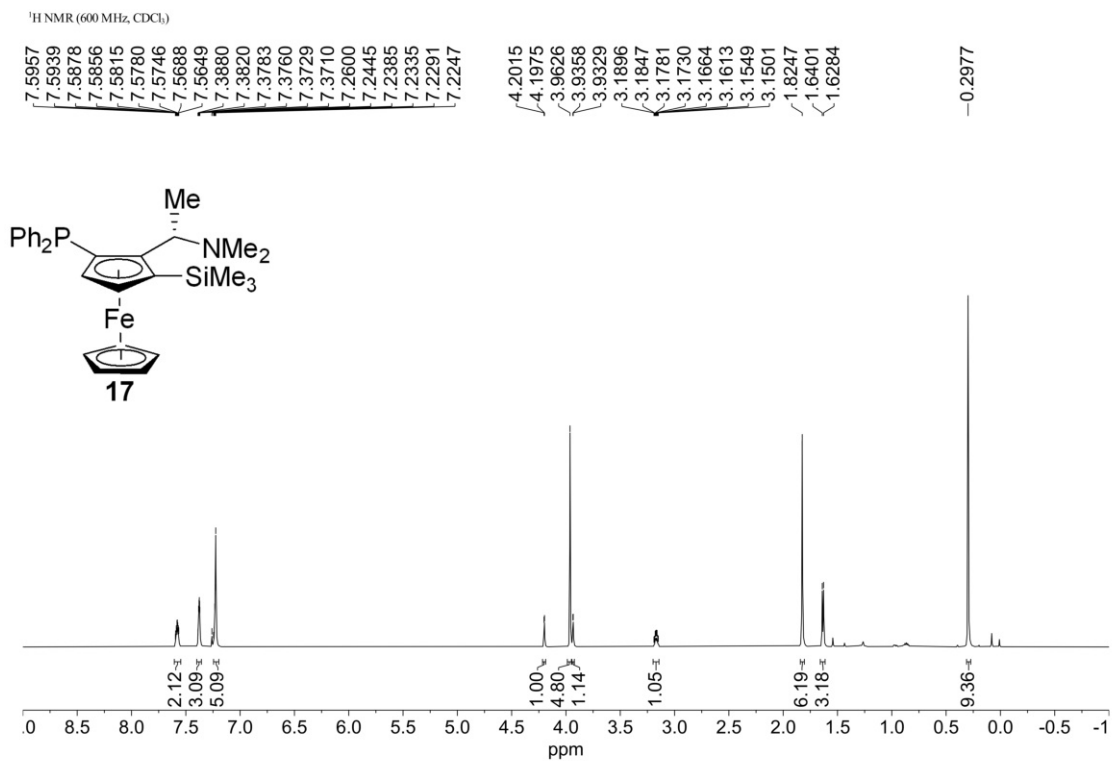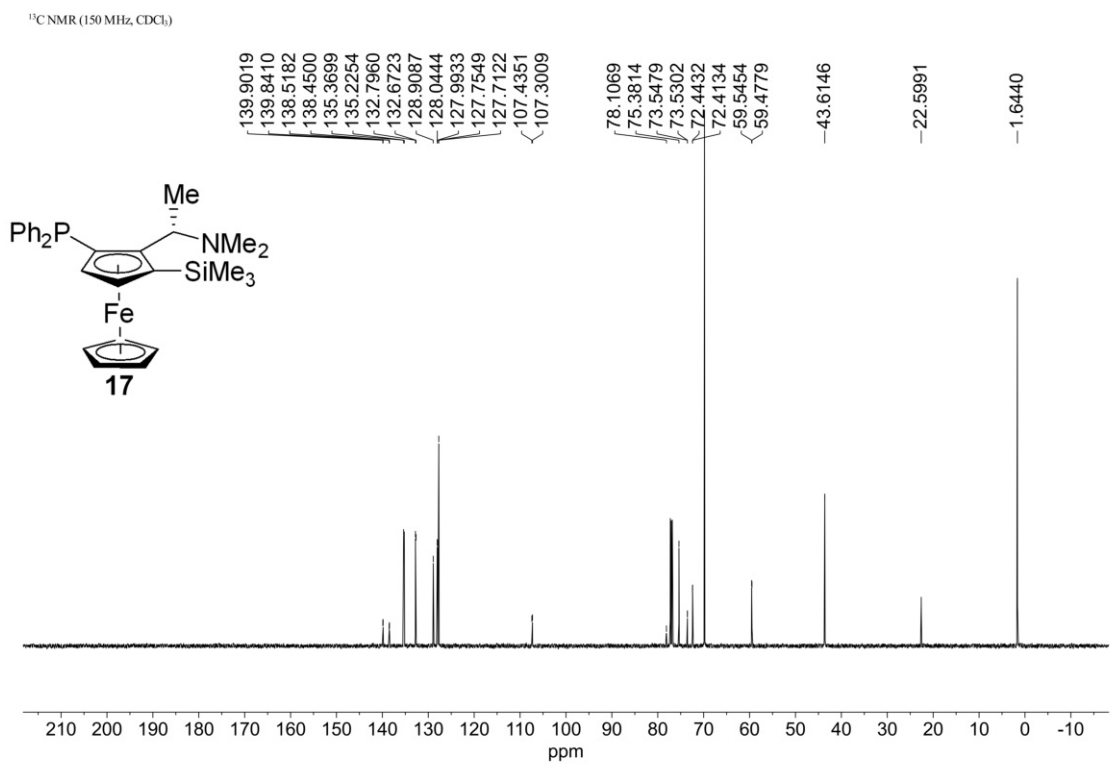

<sup>31</sup>P NMR (243 MHz, CDCl<sub>3</sub>)

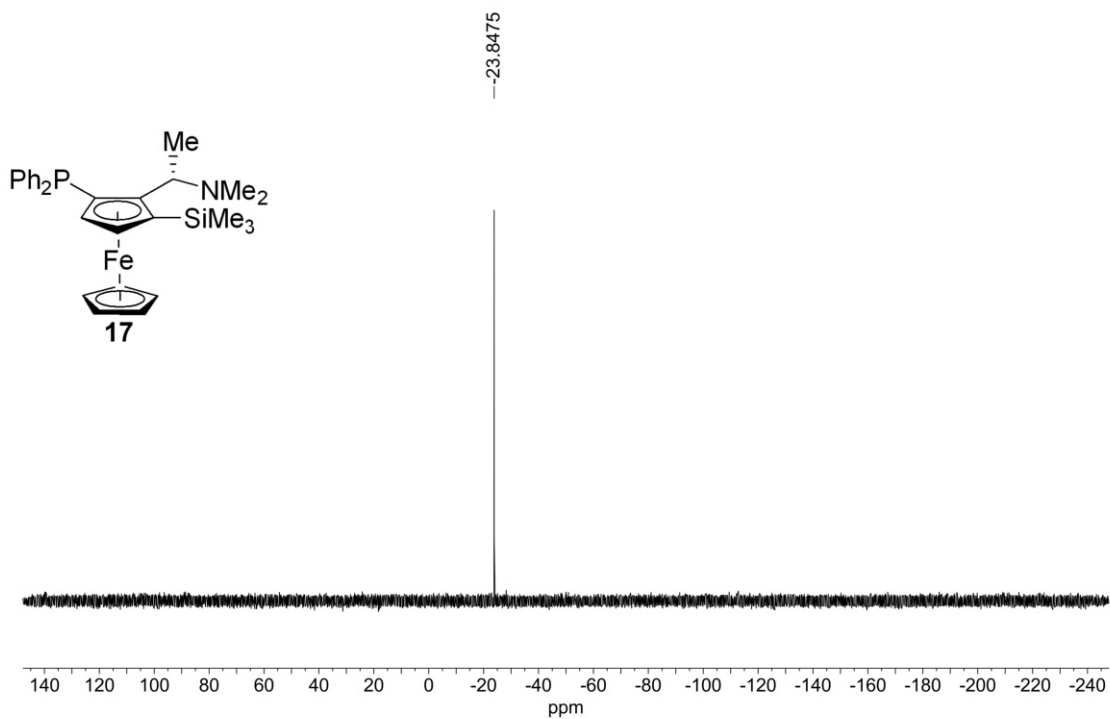

<sup>1</sup>H NMR (600 MHz, CDCl<sub>3</sub>)

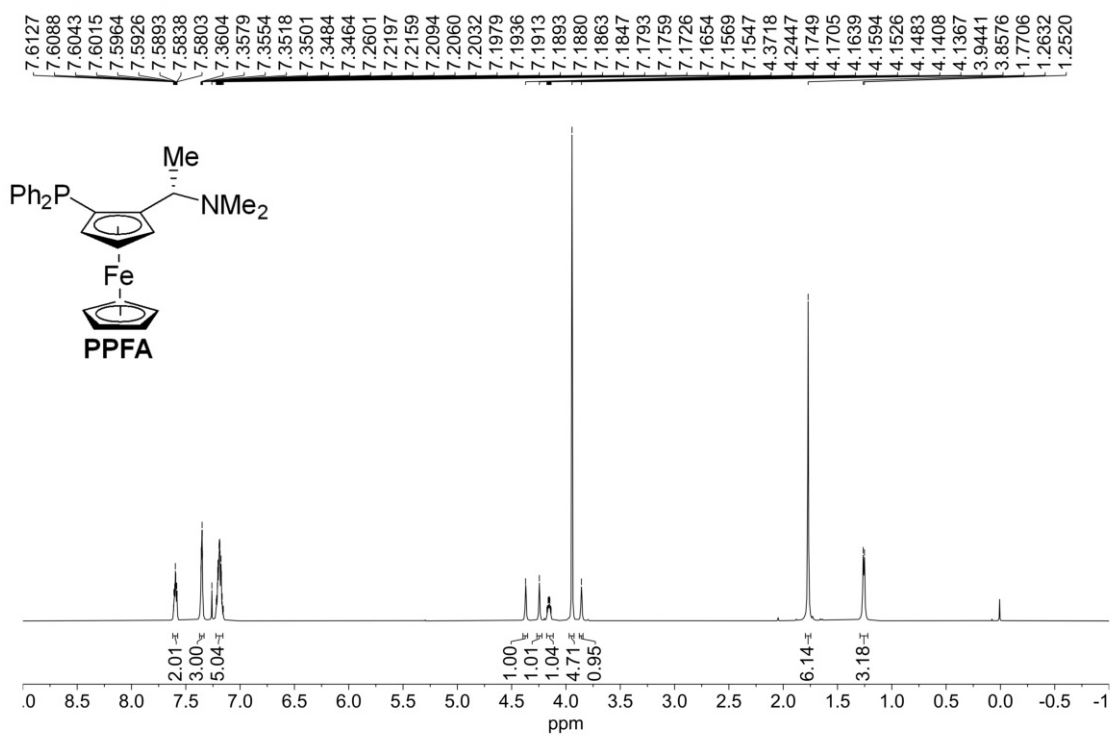

<sup>31</sup>P NMR (243 MHz, CDCl<sub>3</sub>)

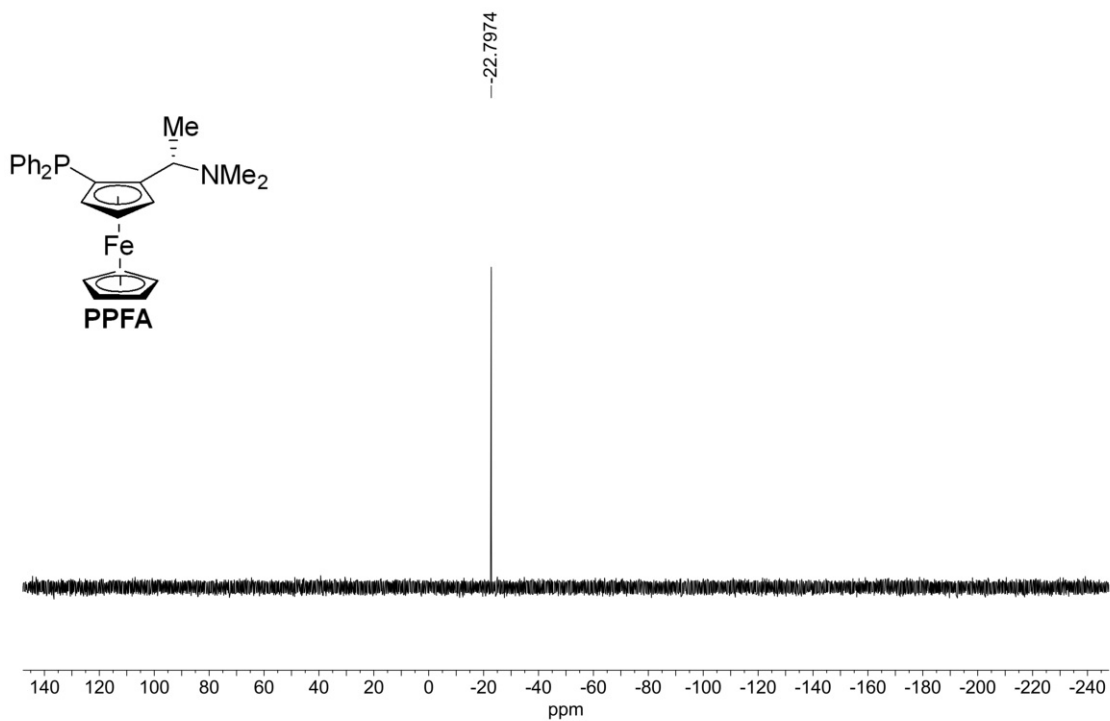

<sup>1</sup>H NMR (600 MHz, CDCl<sub>3</sub>)

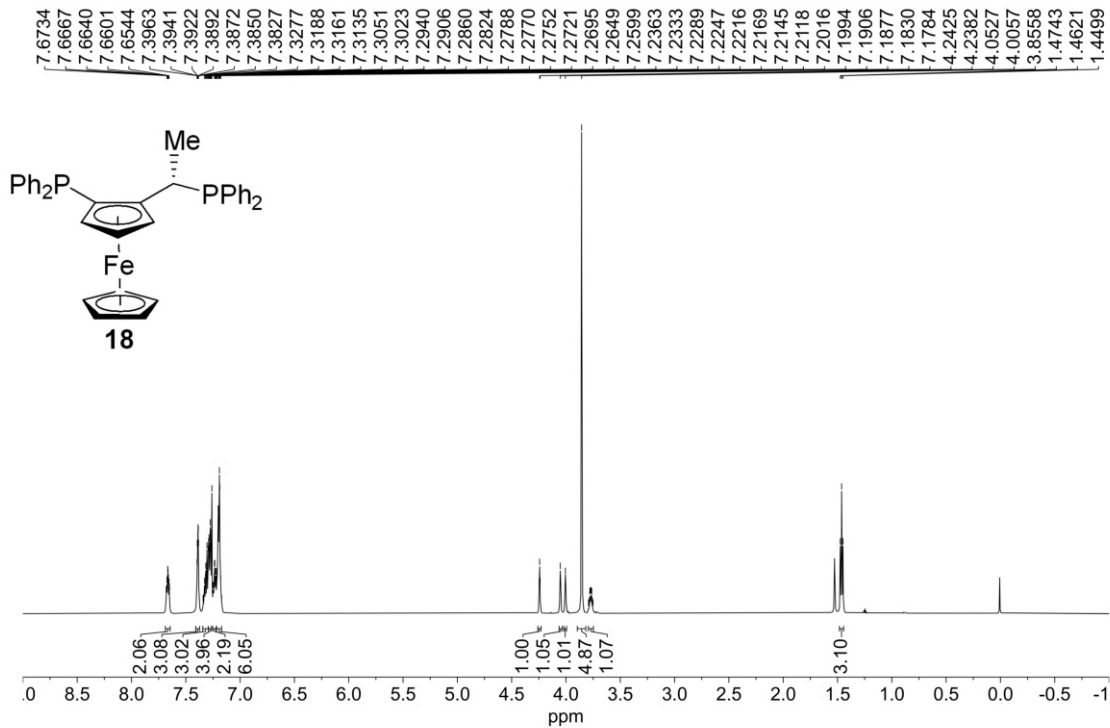



<sup>31</sup>P NMR (243 MHz, CDCl<sub>3</sub>)

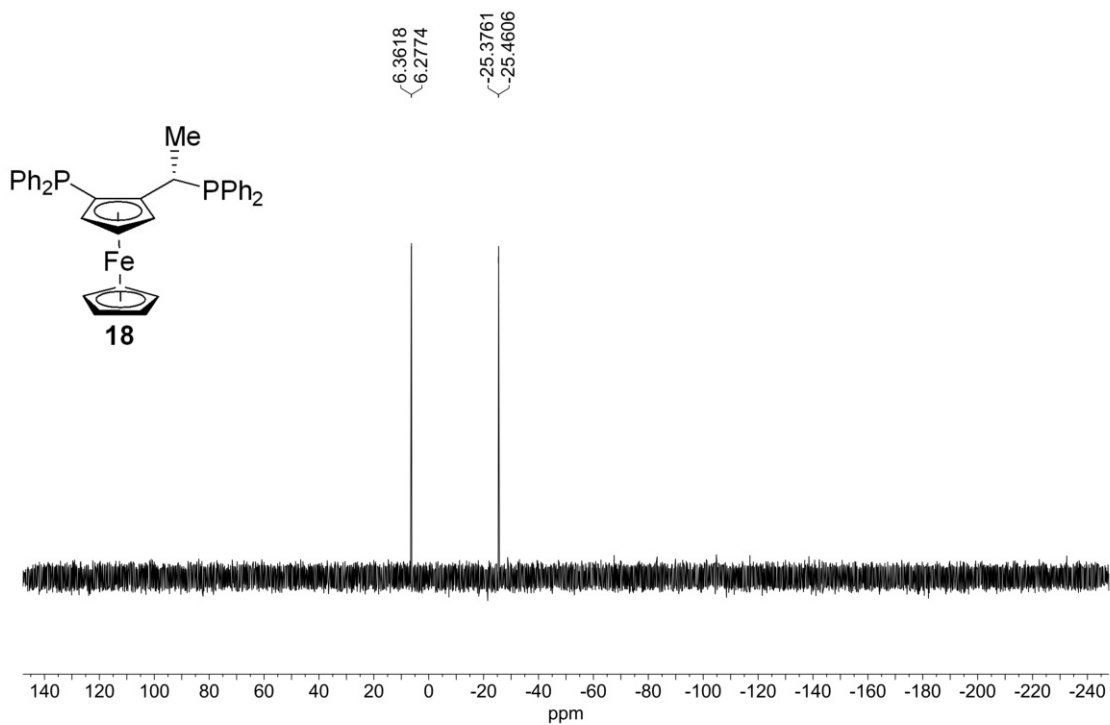

<sup>1</sup>H NMR (600 MHz, Tol)

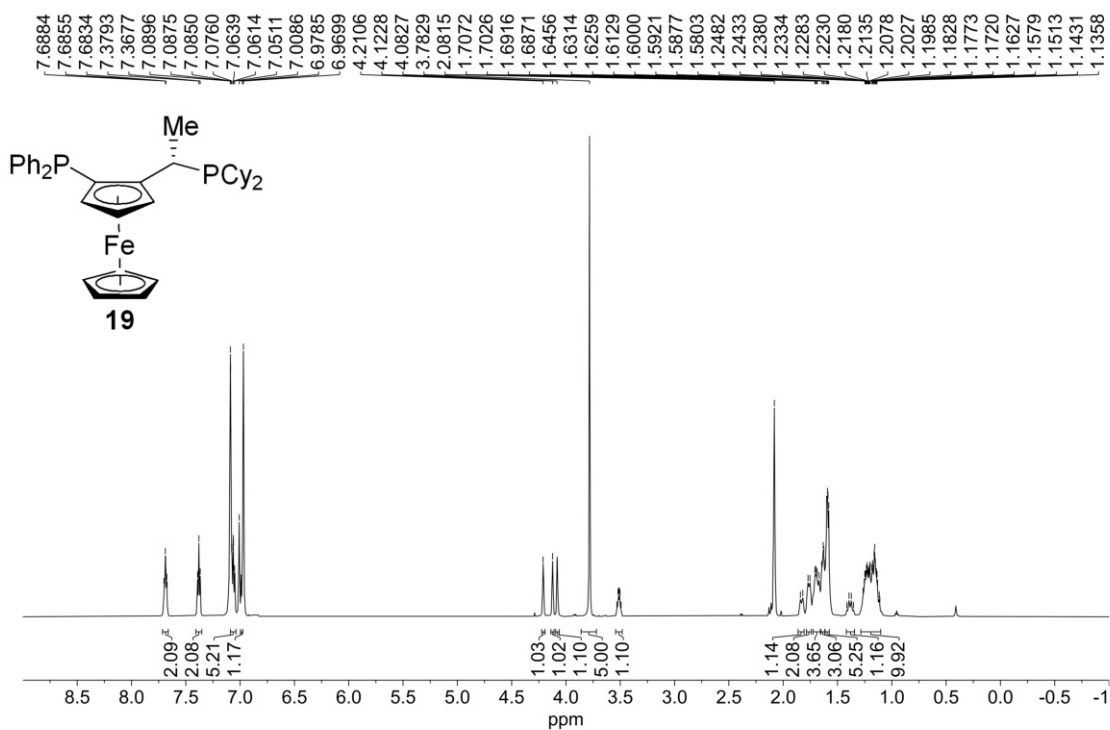

<sup>31</sup>P NMR (243 MHz, Tol).

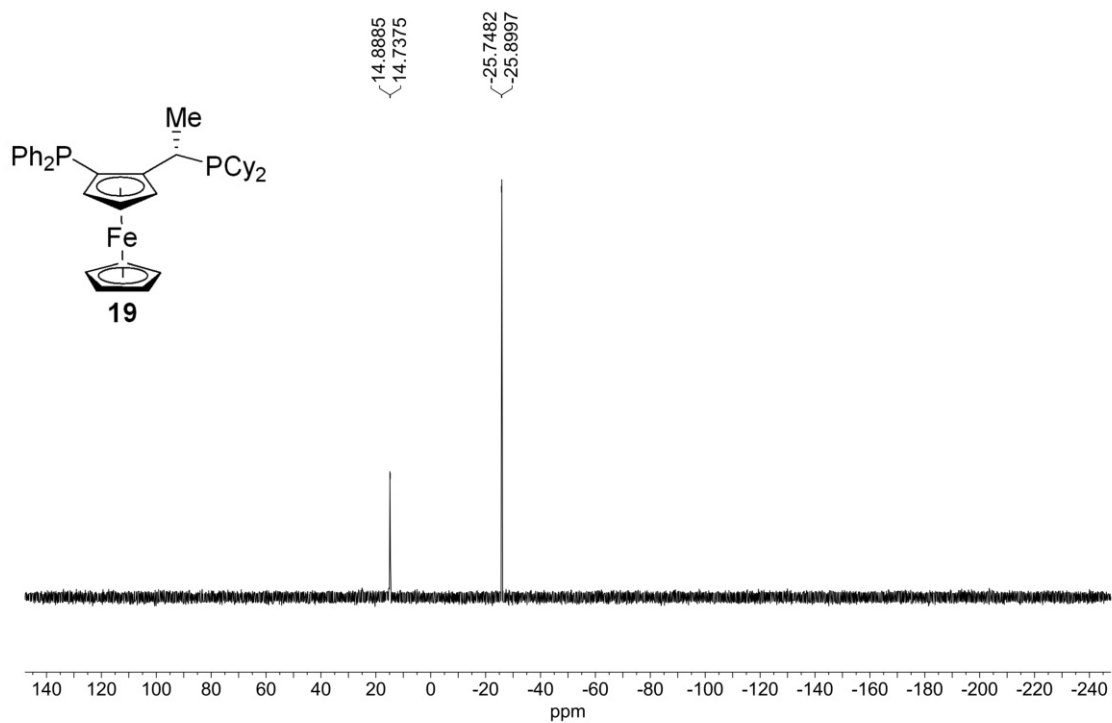

<sup>1</sup>H NMR (600 MHz, CDCl<sub>3</sub>)

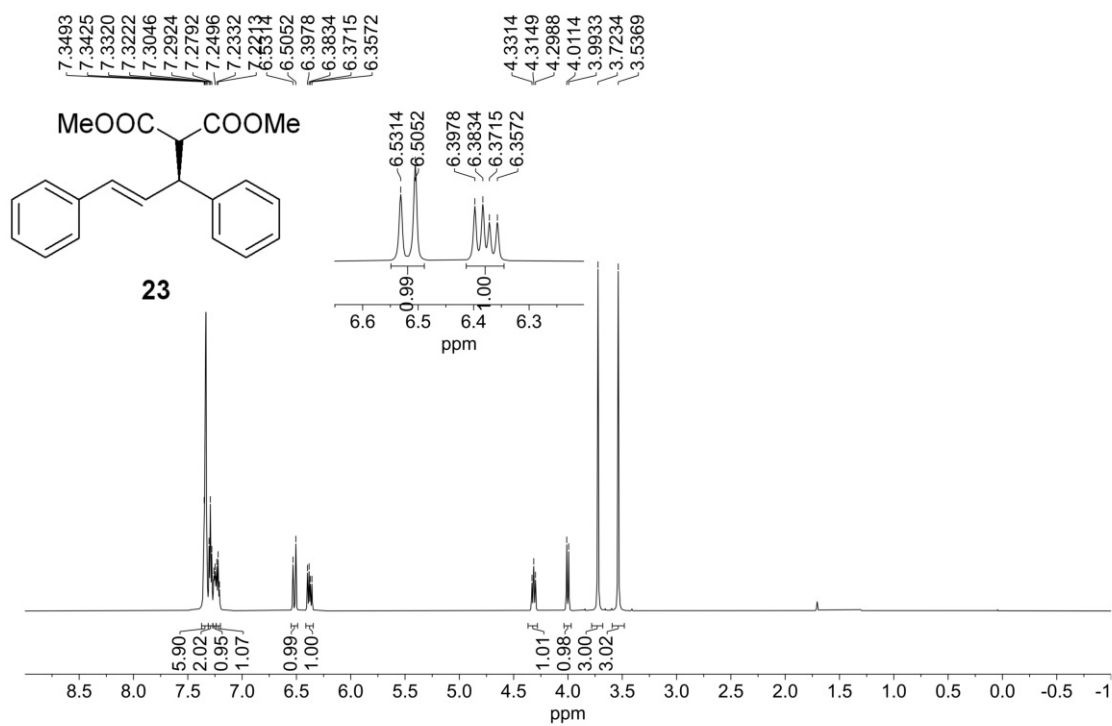

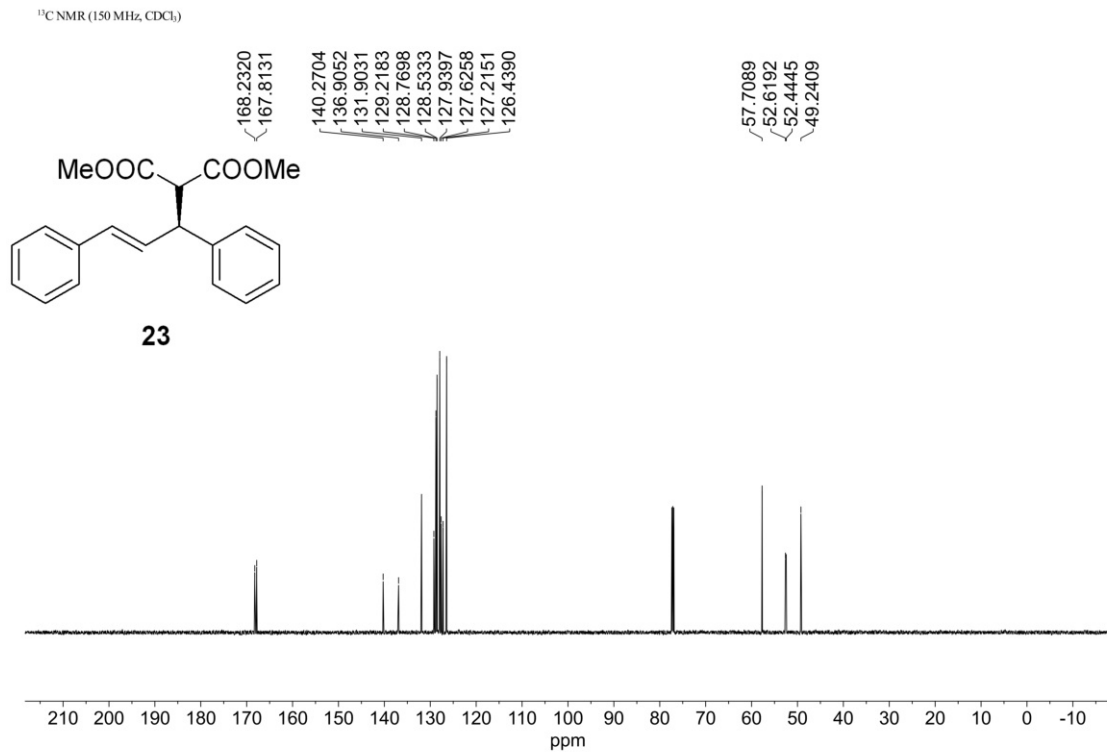

Supplement: d5sc00158g1.pdf [file d5sc00158g1.pdf]
